# Supplementary material for: Lobule-Related Action Potential Shape- and History-Dependent Current Integration in Purkinje Cells of Adult and Developing Mice
Source: MDPI journal article supplement (doi:10.3390/cells12040623), 2023-02-15
Supplement: s1 [file s1]

**Table S1.** Statistical data for *in vitro* whole cell patch electrophysiology in the adult mouse (P>30), for action potential analysis. Descriptive values are represented as  $\pm$  SEM. Abbreviations: LIII = Lobule III, LX = Lobule X, *df* = degrees of freedom, Hz = hertz, pA = picoampere,  $\Omega$  = Ohm, mV = millivolt, Vm = membrane voltage, msec = millisecond.

| Related Figure | Test Applied            | Group       | <i>p</i> -Value   | Population-Value                    | Descriptive Values                                     | Population Size |
|----------------|-------------------------|-------------|-------------------|-------------------------------------|--------------------------------------------------------|-----------------|
| Figure 1B      | Mann–Whitney U test     | LIII vs. LX | <b>&lt;0.0001</b> | (U) 379                             | 78.22 $\pm$ 9.8 $\Omega$ vs. 106.1 $\pm$ 6.6 $\Omega$  | 38 vs. 48 cells |
| Figure 1C      | Mann–Whitney U test     | LIII vs. LX | <b>0.0304</b>     | (U) 625                             | 74.25 $\pm$ 9.6 pA vs. 47.13 $\pm$ 5.5 pA              | 36 vs. 48 cells |
| Figure 1D      | Mann–Whitney U test     | LIII vs. LX | 0.3809            | (U) 750                             | −43.46 $\pm$ 1.0 mV vs. −42.21 $\pm$ 1.0 mV            | 36 vs. 47 cells |
| Figure 1E      | Mann–Whitney U test     | LIII vs. LX | <b>0.0002</b>     | (U) 465                             | 88.11 $\pm$ 1.8 mV vs. 95.95 $\pm$ 1.5 mV              | 36 vs. 48 cells |
| Figure 1F1     | Mann–Whitney U test     | LIII vs. LX | <b>0.0011</b>     | (U) 537                             | 0.145 $\pm$ 0.004 msec vs. 0.173 $\pm$ 0.006 msec      | 37 vs. 48 cells |
| Figure 1F2     | Mann–Whitney U test     | LIII vs. LX | 0.1621            | (U) 739                             | 0.138 $\pm$ 0.007 msec vs. 0.129 $\pm$ 0.003 msec      | 37 vs. 48 cells |
| Figure 1F3     | Welch’s <i>t</i> -test  | LIII vs. LX | <b>&lt;0.0001</b> | ( <i>t</i> ) 6.805 ( <i>df</i> ) 77 | 0.118 $\pm$ 0.005 msec vs. 0.181 $\pm$ 0.008 msec      | 37 vs. 48 cells |
| Figure 1G      | Unpaired <i>t</i> -test | LIII vs. LX | <b>0.0346</b>     | ( <i>t</i> ) 2.149 ( <i>df</i> ) 82 | 10.97 $\pm$ 0.7 mV vs. 9.11 $\pm$ 0.6 mV               | 37 vs. 48 cells |
| Figure 1 S1A1  | Mann–Whitney U test     | LIII vs. LX | <b>&lt;0.0001</b> | (U) 367                             | 62.82 $\pm$ 10.0 $\Omega$ vs. 90.41 $\pm$ 6.6 $\Omega$ | 38 vs. 48 cells |
| Figure 1 S1A2  | Unpaired <i>t</i> -test | LIII vs. LX | 0.6703            | ( <i>t</i> ) 0.427 ( <i>df</i> ) 84 | 15.40 $\pm$ 0.5 $\Omega$ vs. 15.66 $\pm$ 0.4 $\Omega$  | 38 vs. 48 cells |
| Figure 1 S1B   | Mann–Whitney U test     | LIII vs. LX | <b>&lt;0.0001</b> | (U) 390                             | 35.72 $\pm$ 1.6 Vm vs. 43.75 $\pm$ 1.3 Vm              | 36 vs. 48 cells |
| Figure 1 S1C   | Mann–Whitney U test     | LIII vs. LX | <b>0.0005</b>     | (U) 490                             | 0.147 $\pm$ 0.032 msec vs. 0.240 $\pm$ 0.034 msec      | 36 vs. 48 cells |

**Table S2.** Statistical data for in vitro whole cell patch electrophysiology in the adult mouse ( $P > 30$ ), for negative and positive current step analysis. Descriptive values are represented as  $\pm$  SEM. Abbreviations: LIII = Lobule III, LX = Lobule X,  $df$  = degrees of freedom, Hz = hertz, pA = picoampere, mV = millivolt.

| Related Figure | Test Applied           | Group                | <i>p</i> -Value   | Population-Value                     | Descriptive Values                          | Population Size |
|----------------|------------------------|----------------------|-------------------|--------------------------------------|---------------------------------------------|-----------------|
| Figure 2B1     | Mixed-effects analysis | -0 pA: LIII vs. LX   |                   |                                      | 0.00 $\pm$ 0.0 mV                           | 24 vs. 28 cells |
|                |                        | -40 pA: LIII vs. LX  | 0.2300            | ( <i>t</i> ) 1.201 ( <i>df</i> ) 676 | -3.40 $\pm$ 0.9 mV vs. -4.86 $\pm$ 0.9 mV   | 24 vs. 28 cells |
|                |                        | -80 pA: LIII vs. LX  | 0.6317            | ( <i>t</i> ) 0.480 ( <i>df</i> ) 676 | -11.08 $\pm$ 0.8 mV vs. -10.49 $\pm$ 0.8 mV | 24 vs. 28 cells |
|                |                        | -120 pA: LIII vs. LX | 0.1699            | ( <i>t</i> ) 1.374 ( <i>df</i> ) 676 | -13.26 $\pm$ 0.9 mV vs. -14.94 $\pm$ 0.7 mV | 24 vs. 28 cells |
|                |                        | -160 pA: LIII vs. LX | 0.1846            | ( <i>t</i> ) 1.328 ( <i>df</i> ) 676 | -15.67 $\pm$ 0.7 mV vs. -17.29 $\pm$ 0.7 mV | 24 vs. 28 cells |
|                |                        | -200 pA: LIII vs. LX | 0.1561            | ( <i>t</i> ) 1.420 ( <i>df</i> ) 676 | -17.82 $\pm$ 0.6 mV vs. -19.59 $\pm$ 0.7 mV | 24 vs. 28 cells |
|                |                        | -240 pA: LIII vs. LX | 0.0718            | ( <i>t</i> ) 1.803 ( <i>df</i> ) 676 | -19.63 $\pm$ 0.6 mV vs. -21.83 $\pm$ 0.7 mV | 24 vs. 28 cells |
|                |                        | -280 pA: LIII vs. LX | <b>0.0414</b>     | ( <i>t</i> ) 2.044 ( <i>df</i> ) 676 | -21.37 $\pm$ 0.7 mV vs. -23.87 $\pm$ 0.8 mV | 24 vs. 28 cells |
|                |                        | -320 pA: LIII vs. LX | <b>0.0126</b>     | ( <i>t</i> ) 2.502 ( <i>df</i> ) 676 | -22.87 $\pm$ 0.7 mV vs. -25.92 $\pm$ 0.8 mV | 24 vs. 28 cells |
|                |                        | -360 pA: LIII vs. LX | <b>0.0035</b>     | ( <i>t</i> ) 2.929 ( <i>df</i> ) 676 | -24.40 $\pm$ 0.8 mV vs. -27.97 $\pm$ 0.9 mV | 24 vs. 28 cells |
|                |                        | -400 pA: LIII vs. LX | <b>0.0015</b>     | ( <i>t</i> ) 3.196 ( <i>df</i> ) 676 | -26.04 $\pm$ 0.8 mV vs. -29.94 $\pm$ 1.0 mV | 24 vs. 28 cells |
|                |                        | -440 pA: LIII vs. LX | <b>0.0022</b>     | ( <i>t</i> ) 3.078 ( <i>df</i> ) 676 | -25.27 $\pm$ 1.2 mV vs. -33.35 $\pm$ 2.4 mV | 7 vs. 9 cells   |
|                |                        | -480 pA: LIII vs. LX | <b>0.0008</b>     | ( <i>t</i> ) 3.354 ( <i>df</i> ) 676 | -26.56 $\pm$ 1.3 mV vs. -35.11 $\pm$ 2.3 mV | 7 vs. 9 cells   |
|                |                        | -520 pA: LIII vs. LX | <b>0.0005</b>     | ( <i>t</i> ) 3.483 ( <i>df</i> ) 676 | -28.58 $\pm$ 1.4 mV vs. -37.45 $\pm$ 2.5 mV | 7 vs. 9 cells   |
|                |                        | -560 pA: LIII vs. LX | <b>0.0001</b>     | ( <i>t</i> ) 3.880 ( <i>df</i> ) 676 | -30.02 $\pm$ 1.4 mV vs. -39.46 $\pm$ 2.7 mV | 7 vs. 9 cells   |
|                |                        | -600 pA: LIII vs. LX | <b>&gt;0.0001</b> | ( <i>t</i> ) 4.223 ( <i>df</i> ) 676 | -31.59 $\pm$ 1.5 mV vs. -41.61 $\pm$ 2.9 mV | 7 vs. 9 cells   |
|                |                        | -640 pA: LIII vs. LX | <b>&gt;0.0001</b> | ( <i>t</i> ) 4.670 ( <i>df</i> ) 676 | -33.12 $\pm$ 1.6 mV vs. -43.90 $\pm$ 3.3 mV | 7 vs. 9 cells   |
| Figure 2B2     | Mixed-effects analysis | -680 pA: LIII vs. LX | <b>&gt;0.0001</b> | ( <i>t</i> ) 4.930 ( <i>df</i> ) 676 | -34.43 $\pm$ 1.7 mV vs. -45.65 $\pm$ 3.3 mV | 7 vs. 9 cells   |
|                |                        | -720 pA: LIII vs. LX | <b>&gt;0.0001</b> | ( <i>t</i> ) 5.405 ( <i>df</i> ) 676 | -35.96 $\pm$ 1.7 mV vs. -47.98 $\pm$ 3.4 mV | 7 vs. 9 cells   |
|                |                        | -760 pA: LIII vs. LX | <b>&gt;0.0001</b> | ( <i>t</i> ) 5.597 ( <i>df</i> ) 676 | -37.32 $\pm$ 1.7 mV vs. -49.67 $\pm$ 3.4 mV | 7 vs. 9 cells   |
|                |                        | -0 pA: LIII vs. LX   | <b>&gt;0.0001</b> | ( <i>t</i> ) 5.409 ( <i>df</i> ) 676 | 45.17 $\pm$ 7.2 Hz vs. 29.14 $\pm$ 3.5 Hz   | 24 vs. 28 cells |
|                |                        | -40 pA: LIII vs. LX  | <b>&gt;0.0001</b> | ( <i>t</i> ) 4.073 ( <i>df</i> ) 676 | 24.21 $\pm$ 6.6 Hz vs. 12.14 $\pm$ 3.2 Hz   | 24 vs. 28 cells |
|                |                        | -80 pA: LIII vs. LX  | 0.9025            | ( <i>t</i> ) 0.123 ( <i>df</i> ) 676 | 3.21 $\pm$ 2.3 Hz vs. 3.57 $\pm$ 2.0 Hz     | 24 vs. 28 cells |
|                |                        | -120 pA: LIII vs. LX | 0.6835            | ( <i>t</i> ) 0.408 ( <i>df</i> ) 676 | 1.21 $\pm$ 1.0 Hz vs. 0.00 $\pm$ 0.0 Hz     | 24 vs. 28 cells |
|                |                        | -160 pA: LIII vs. LX | >0.9999           | ( <i>t</i> ) 0.000 ( <i>df</i> ) 676 | 0.00 $\pm$ 0.0 Hz vs. 0.00 $\pm$ 0.0 Hz     | 24 vs. 28 cells |
|                |                        | -200 pA: LIII vs. LX | >0.9999           | ( <i>t</i> ) 0.000 ( <i>df</i> ) 676 | 0.00 $\pm$ 0.0 Hz vs. 0.00 $\pm$ 0.0 Hz     | 24 vs. 28 cells |
|                |                        | -240 pA: LIII vs. LX | >0.9999           | ( <i>t</i> ) 0.000 ( <i>df</i> ) 676 | 0.00 $\pm$ 0.0 Hz vs. 0.00 $\pm$ 0.0 Hz     | 24 vs. 28 cells |
|                |                        | -280 pA: LIII vs. LX | >0.9999           | ( <i>t</i> ) 0.000 ( <i>df</i> ) 676 | 0.00 $\pm$ 0.0 Hz vs. 0.00 $\pm$ 0.0 Hz     | 24 vs. 28 cells |
|                |                        | -320 pA: LIII vs. LX | >0.9999           | ( <i>t</i> ) 0.000 ( <i>df</i> ) 676 | 0.00 $\pm$ 0.0 Hz vs. 0.00 $\pm$ 0.0 Hz     | 24 vs. 28 cells |
|                |                        | -360 pA: LIII vs. LX | >0.9999           | ( <i>t</i> ) 0.000 ( <i>df</i> ) 676 | 0.00 $\pm$ 0.0 Hz vs. 0.00 $\pm$ 0.0 Hz     | 24 vs. 28 cells |
|                |                        | -400 pA: LIII vs. LX | >0.9999           | ( <i>t</i> ) 0.000 ( <i>df</i> ) 676 | 0.00 $\pm$ 0.0 Hz vs. 0.00 $\pm$ 0.0 Hz     | 24 vs. 28 cells |
|                |                        | -440 pA: LIII vs. LX | 0.7388            | ( <i>t</i> ) 0.334 ( <i>df</i> ) 676 | 0.00 $\pm$ 0.0 Hz vs. 0.00 $\pm$ 0.0 Hz     | 7 vs. 9 cells   |
|                |                        | -480 pA: LIII vs. LX | 0.7388            | ( <i>t</i> ) 0.334 ( <i>df</i> ) 676 | 0.00 $\pm$ 0.0 Hz vs. 0.00 $\pm$ 0.0 Hz     | 7 vs. 9 cells   |
|                |                        | -520 pA: LIII vs. LX | 0.7388            | ( <i>t</i> ) 0.334 ( <i>df</i> ) 676 | 0.00 $\pm$ 0.0 Hz vs. 0.00 $\pm$ 0.0 Hz     | 7 vs. 9 cells   |
| Figure 2B3     | Mixed-effects analysis | -560 pA: LIII vs. LX | 0.7388            | ( <i>t</i> ) 0.334 ( <i>df</i> ) 676 | 0.00 $\pm$ 0.0 Hz vs. 0.00 $\pm$ 0.0 Hz     | 7 vs. 9 cells   |
|                |                        | -600 pA: LIII vs. LX | 0.7388            | ( <i>t</i> ) 0.334 ( <i>df</i> ) 676 | 0.00 $\pm$ 0.0 Hz vs. 0.00 $\pm$ 0.0 Hz     | 7 vs. 9 cells   |
|                |                        | -640 pA: LIII vs. LX | 0.7388            | ( <i>t</i> ) 0.334 ( <i>df</i> ) 676 | 0.00 $\pm$ 0.0 Hz vs. 0.00 $\pm$ 0.0 Hz     | 7 vs. 9 cells   |
|                |                        | -680 pA: LIII vs. LX | 0.7388            | ( <i>t</i> ) 0.334 ( <i>df</i> ) 676 | 0.00 $\pm$ 0.0 Hz vs. 0.00 $\pm$ 0.0 Hz     | 7 vs. 9 cells   |
|                |                        | -720 pA: LIII vs. LX | 0.7388            | ( <i>t</i> ) 0.334 ( <i>df</i> ) 676 | 0.00 $\pm$ 0.0 Hz vs. 0.00 $\pm$ 0.0 Hz     | 7 vs. 9 cells   |
|                |                        | -760 pA: LIII vs. LX | 0.7388            | ( <i>t</i> ) 0.334 ( <i>df</i> ) 676 | 0.00 $\pm$ 0.0 Hz vs. 0.00 $\pm$ 0.0 Hz     | 7 vs. 9 cells   |
|                |                        | -0 pA: LIII vs. LX   | <b>&gt;0.9999</b> | ( <i>t</i> ) 0.000 ( <i>df</i> ) 676 | 100 $\pm$ 0 % vs. 100 $\pm$ 0 %             | 24 vs. 28 cells |
|                |                        | -40 pA: LIII vs. LX  | <b>0.0015</b>     | ( <i>t</i> ) 3.189 ( <i>df</i> ) 676 | 45 $\pm$ 12 % vs. 28 $\pm$ 6 %              | 24 vs. 28 cells |
|                |                        | -80 pA: LIII vs. LX  | <b>0.0242</b>     | ( <i>t</i> ) 2.259 ( <i>df</i> ) 676 | 17 $\pm$ 14 % vs. 6 $\pm$ 3 %               | 24 vs. 28 cells |
|                |                        | -120 pA: LIII vs. LX | <b>0.4035</b>     | ( <i>t</i> ) 0.000 ( <i>df</i> ) 676 | 4 $\pm$ 3 % vs. 0 $\pm$ 0 %                 | 24 vs. 28 cells |
|                |                        | -160 pA: LIII vs. LX | <b>&gt;0.9999</b> | ( <i>t</i> ) 0.000 ( <i>df</i> ) 676 | 0 $\pm$ 0 % vs. 0 $\pm$ 0 %                 | 24 vs. 28 cells |
|                |                        | -200 pA: LIII vs. LX | <b>&gt;0.9999</b> | ( <i>t</i> ) 0.000 ( <i>df</i> ) 676 | 0 $\pm$ 0 % vs. 0 $\pm$ 0 %                 | 24 vs. 28 cells |
|                |                        | -240 pA: LIII vs. LX | <b>&gt;0.9999</b> | ( <i>t</i> ) 0.000 ( <i>df</i> ) 676 | 0 $\pm$ 0 % vs. 0 $\pm$ 0 %                 | 24 vs. 28 cells |
|                |                        | -280 pA: LIII vs. LX | <b>&gt;0.9999</b> | ( <i>t</i> ) 0.000 ( <i>df</i> ) 676 | 0 $\pm$ 0 % vs. 0 $\pm$ 0 %                 | 24 vs. 28 cells |
|                |                        | -320 pA: LIII vs. LX | <b>&gt;0.9999</b> | ( <i>t</i> ) 0.000 ( <i>df</i> ) 676 | 0 $\pm$ 0 % vs. 0 $\pm$ 0 %                 | 24 vs. 28 cells |
|                |                        | -360 pA: LIII vs. LX | <b>&gt;0.9999</b> | ( <i>t</i> ) 0.000 ( <i>df</i> ) 676 | 0 $\pm$ 0 % vs. 0 $\pm$ 0 %                 | 24 vs. 28 cells |
|                |                        | -400 pA: LIII vs. LX | <b>&gt;0.9999</b> | ( <i>t</i> ) 0.190 ( <i>df</i> ) 676 | 0 $\pm$ 0 % vs. 0 $\pm$ 0 %                 | 24 vs. 28 cells |
|                |                        | -440 pA: LIII vs. LX | <b>0.8498</b>     | ( <i>t</i> ) 0.190 ( <i>df</i> ) 676 | 0 $\pm$ 0 % vs. 0 $\pm$ 0 %                 | 7 vs. 9 cells   |
|                |                        | -480 pA: LIII vs. LX | <b>0.8498</b>     | ( <i>t</i> ) 0.190 ( <i>df</i> ) 676 | 0 $\pm$ 0 % vs. 0 $\pm$ 0 %                 | 7 vs. 9 cells   |
|                |                        | -520 pA: LIII vs. LX | <b>0.8498</b>     | ( <i>t</i> ) 0.190 ( <i>df</i> ) 676 | 0 $\pm$ 0 % vs. 0 $\pm$ 0 %                 | 7 vs. 9 cells   |
|                |                        | -560 pA: LIII vs. LX | <b>0.8498</b>     | ( <i>t</i> ) 0.190 ( <i>df</i> ) 676 | 0 $\pm$ 0 % vs. 0 $\pm$ 0 %                 | 7 vs. 9 cells   |
|                |                        | -600 pA: LIII vs. LX | <b>0.8498</b>     | ( <i>t</i> ) 0.190 ( <i>df</i> ) 676 | 0 $\pm$ 0 % vs. 0 $\pm$ 0 %                 | 7 vs. 9 cells   |
|                |                        | -640 pA: LIII vs. LX | <b>0.8498</b>     | ( <i>t</i> ) 0.190 ( <i>df</i> ) 676 | 0 $\pm$ 0 % vs. 0 $\pm$ 0 %                 | 7 vs. 9 cells   |
|                |                        | -680 pA: LIII vs. LX | <b>0.8498</b>     | ( <i>t</i> ) 0.190 ( <i>df</i> ) 676 | 0 $\pm$ 0 % vs. 0 $\pm$ 0 %                 | 7 vs. 9 cells   |

|             |               |  |                      |                   |                                       |                                      |                 |
|-------------|---------------|--|----------------------|-------------------|---------------------------------------|--------------------------------------|-----------------|
|             |               |  | -720 pA: LIII vs. LX | <b>0.8498</b>     | ( <i>t</i> ) 0.190 ( <i>df</i> ) 676  | 0 ± 0 % vs. 0 ± 0 %                  | 7 vs. 9 cells   |
|             |               |  | -760 pA: LIII vs. LX | <b>0.8498</b>     | ( <i>t</i> ) 0.190 ( <i>df</i> ) 676  | 0 ± 0 % vs. 0 ± 0 %                  | 7 vs. 9 cells   |
| Figure 2C1  | Two-way ANOVA |  | 0 pA: LIII vs. LX    |                   |                                       | 0.00 ± 0.0 mV                        | 24 vs. 28 cells |
|             |               |  | 40 pA: LIII vs. LX   | 0.1283            | ( <i>t</i> ) 1.522 ( <i>df</i> ) 1020 | 2.49 ± 0.1 mV vs. 4.25 ± 0.5 mV      | 24 vs. 28 cells |
|             |               |  | 80 pA: LIII vs. LX   | 0.1128            | ( <i>t</i> ) 1.587 ( <i>df</i> ) 1020 | 8.22 ± 0.9 mV vs. 10.05 ± 0.7 mV     | 24 vs. 28 cells |
|             |               |  | 120 pA: LIII vs. LX  | 0.0658            | ( <i>t</i> ) 1.842 ( <i>df</i> ) 1020 | 11.02 ± 0.8 mV vs. 13.16 ± 0.6 mV    | 24 vs. 28 cells |
|             |               |  | 160 pA: LIII vs. LX  | 0.2259            | ( <i>t</i> ) 1.212 ( <i>df</i> ) 1020 | 13.24 ± 0.7 mV vs. 14.64 ± 0.5 mV    | 24 vs. 28 cells |
|             |               |  | 200 pA: LIII vs. LX  | 0.4621            | ( <i>t</i> ) 0.736 ( <i>df</i> ) 1020 | 14.31 ± 0.5 mV vs. 15.16 ± 0.6 mV    | 24 vs. 28 cells |
|             |               |  | 240 pA: LIII vs. LX  | 0.6287            | ( <i>t</i> ) 0.484 ( <i>df</i> ) 1020 | 14.94 ± 0.5 mV vs. 15.50 ± 0.5 mV    | 24 vs. 28 cells |
|             |               |  | 280 pA: LIII vs. LX  | 0.4827            | ( <i>t</i> ) 0.702 ( <i>df</i> ) 1020 | 15.60 ± 0.5 mV vs. 14.79 ± 0.7 mV    | 24 vs. 28 cells |
|             |               |  | 320 pA: LIII vs. LX  | 0.4296            | ( <i>t</i> ) 0.790 ( <i>df</i> ) 1020 | 15.61 ± 0.6 mV vs. 14.70 ± 0.7 mV    | 24 vs. 28 cells |
|             |               |  | 360 pA: LIII vs. LX  | 0.2566            | ( <i>t</i> ) 1.135 ( <i>df</i> ) 1020 | 15.77 ± 0.6 mV vs. 14.45 ± 0.7 mV    | 24 vs. 28 cells |
|             |               |  | 400 pA: LIII vs. LX  | 0.0875            | ( <i>t</i> ) 1.711 ( <i>df</i> ) 1020 | 15.98 ± 0.7 mV vs. 14.00 ± 0.9 mV    | 24 vs. 28 cells |
|             |               |  | 440 pA: LIII vs. LX  | 0.2934            | ( <i>t</i> ) 1.051 ( <i>df</i> ) 1020 | 15.92 ± 0.8 mV vs. 14.70 ± 0.9 mV    | 7 vs. 9 cells   |
|             |               |  | 480 pA: LIII vs. LX  | 0.3516            | ( <i>t</i> ) 0.932 ( <i>df</i> ) 1020 | 16.37 ± 1.0 mV vs. 15.29 ± 0.9 mV    | 7 vs. 9 cells   |
|             |               |  | 520 pA: LIII vs. LX  | 0.1777            | ( <i>t</i> ) 1.349 ( <i>df</i> ) 1020 | 16.71 ± 1.0 mV vs. 15.15 ± 0.8 mV    | 7 vs. 9 cells   |
|             |               |  | 560 pA: LIII vs. LX  | 0.0537            | ( <i>t</i> ) 1.931 ( <i>df</i> ) 1020 | 17.51 ± 1.1 mV vs. 15.28 ± 0.8 mV    | 7 vs. 9 cells   |
|             |               |  | 600 pA: LIII vs. LX  | 0.1716            | ( <i>t</i> ) 1.368 ( <i>df</i> ) 1020 | 17.76 ± 1.3 mV vs. 16.18 ± 0.8 mV    | 7 vs. 9 cells   |
|             |               |  | 640 pA: LIII vs. LX  | <b>0.0299</b>     | ( <i>t</i> ) 2.174 ( <i>df</i> ) 1020 | 19.33 ± 1.1 mV vs. 16.81 ± 0.9 mV    | 7 vs. 9 cells   |
|             |               |  | 680 pA: LIII vs. LX  | <b>0.0418</b>     | ( <i>t</i> ) 2.038 ( <i>df</i> ) 1020 | 20.26 ± 1.2 mV vs. 17.90 ± 0.9 mV    | 7 vs. 9 cells   |
| Figure 2C2  | Two-way ANOVA |  | 720 pA: LIII vs. LX  | <b>0.0405</b>     | ( <i>t</i> ) 2.051 ( <i>df</i> ) 1020 | 20.99 ± 1.2 mV vs. 18.61 ± 0.9 mV    | 7 vs. 9 cells   |
|             |               |  | 760 pA: LIII vs. LX  | <b>0.0380</b>     | ( <i>t</i> ) 2.078 ( <i>df</i> ) 1020 | 22.01 ± 1.3 mV vs. 19.60 ± 0.9 mV    | 7 vs. 9 cells   |
|             |               |  | 0 pA: LIII vs. LX    | >0.9999           | ( <i>t</i> ) 0.000 ( <i>df</i> ) 1020 | 0.00 ± 0.0 Hz vs. 0.00 ± 0.0 Hz      | 26 vs. 27 cells |
|             |               |  | 40 pA: LIII vs. LX   | 0.8196            | ( <i>t</i> ) 0.228 ( <i>df</i> ) 1020 | 0.00 ± 0.0 Hz vs. 2.37 ± 1.5 Hz      | 26 vs. 27 cells |
|             |               |  | 80 pA: LIII vs. LX   | 0.9230            | ( <i>t</i> ) 0.097 ( <i>df</i> ) 1020 | 16.89 ± 5.1 Hz vs. 17.89 ± 3.6 Hz    | 26 vs. 27 cells |
|             |               |  | 120 pA: LIII vs. LX  | 0.7867            | ( <i>t</i> ) 0.271 ( <i>df</i> ) 1020 | 30.07 ± 6.6 Hz vs. 32.89 ± 4.2 Hz    | 26 vs. 27 cells |
|             |               |  | 160 pA: LIII vs. LX  | 0.8170            | ( <i>t</i> ) 0.232 ( <i>df</i> ) 1020 | 43.92 ± 7.1 Hz vs. 41.52 ± 4.4 Hz    | 26 vs. 27 cells |
|             |               |  | 200 pA: LIII vs. LX  | 0.5404            | ( <i>t</i> ) 0.612 ( <i>df</i> ) 1020 | 55.77 ± 7.7 Hz vs. 49.41 ± 4.5 Hz    | 26 vs. 27 cells |
|             |               |  | 240 pA: LIII vs. LX  | 0.2165            | ( <i>t</i> ) 1.237 ( <i>df</i> ) 1020 | 68.85 ± 7.9 Hz vs. 56.00 ± 4.6 Hz    | 26 vs. 27 cells |
|             |               |  | 280 pA: LIII vs. LX  | 0.1009            | ( <i>t</i> ) 1.642 ( <i>df</i> ) 1020 | 79.62 ± 8.3 Hz vs. 62.56 ± 4.9 Hz    | 26 vs. 27 cells |
|             |               |  | 320 pA: LIII vs. LX  | <b>0.0312</b>     | ( <i>t</i> ) 2.157 ( <i>df</i> ) 1020 | 91.12 ± 8.3 Hz vs. 68.70 ± 5.2 Hz    | 26 vs. 27 cells |
|             |               |  | 360 pA: LIII vs. LX  | <b>0.0072</b>     | ( <i>t</i> ) 2.694 ( <i>df</i> ) 1020 | 102.58 ± 8.6 Hz vs. 74.59 ± 5.3 Hz   | 26 vs. 27 cells |
|             |               |  | 400 pA: LIII vs. LX  | <b>0.0017</b>     | ( <i>t</i> ) 3.145 ( <i>df</i> ) 1020 | 113.04 ± 9.0 Hz vs. 80.37 ± 5.5 Hz   | 26 vs. 27 cells |
|             |               |  | 440 pA: LIII vs. LX  | <b>0.0003</b>     | ( <i>t</i> ) 3.589 ( <i>df</i> ) 1020 | 123.77 ± 9.4 Hz vs. 86.48 ± 5.8 Hz   | 26 vs. 27 cells |
|             |               |  | 480 pA: LIII vs. LX  | <b>&lt;0.0001</b> | ( <i>t</i> ) 4.174 ( <i>df</i> ) 1020 | 134.89 ± 9.8 Hz vs. 91.52 ± 6.0 Hz   | 26 vs. 27 cells |
|             |               |  | 520 pA: LIII vs. LX  | <b>&lt;0.0001</b> | ( <i>t</i> ) 4.602 ( <i>df</i> ) 1020 | 144.96 ± 10.3 Hz vs. 97.15 ± 6.2 Hz  | 26 vs. 27 cells |
|             |               |  | 560 pA: LIII vs. LX  | <b>&lt;0.0001</b> | ( <i>t</i> ) 5.039 ( <i>df</i> ) 1020 | 154.54 ± 10.8 Hz vs. 102.19 ± 6.5 Hz | 26 vs. 27 cells |
|             |               |  | 600 pA: LIII vs. LX  | <b>&lt;0.0001</b> | ( <i>t</i> ) 5.504 ( <i>df</i> ) 1020 | 163.77 ± 11.2 Hz vs. 106.59 ± 6.6 Hz | 26 vs. 27 cells |
| Figure 2C3  | Two-way ANOVA |  | 640 pA: LIII vs. LX  | <b>&lt;0.0001</b> | ( <i>t</i> ) 5.976 ( <i>df</i> ) 1020 | 173.19 ± 11.4 Hz vs. 111.11 ± 6.8 Hz | 26 vs. 27 cells |
|             |               |  | 680 pA: LIII vs. LX  | <b>&lt;0.0001</b> | ( <i>t</i> ) 6.390 ( <i>df</i> ) 1020 | 182.27 ± 11.4 Hz vs. 115.89 ± 7.1 Hz | 26 vs. 27 cells |
|             |               |  | 720 pA: LIII vs. LX  | <b>&lt;0.0001</b> | ( <i>t</i> ) 6.838 ( <i>df</i> ) 1020 | 191.04 ± 11.4 Hz vs. 120.00 ± 7.2 Hz | 26 vs. 27 cells |
|             |               |  | 760 pA: LIII vs. LX  | <b>&lt;0.0001</b> | ( <i>t</i> ) 7.335 ( <i>df</i> ) 1020 | 200.42 ± 11.7 Hz vs. 124.22 ± 7.4 Hz | 26 vs. 27 cells |
|             |               |  | 0 pA: LIII vs. LX    | >0.9999           | ( <i>t</i> ) 0.000 ( <i>df</i> ) 1020 | 0 ± 0 % vs. 0 ± 0 %                  | 26 vs. 27 cells |
|             |               |  | 40 pA: LIII vs. LX   | 0.4887            | ( <i>t</i> ) 0.693 ( <i>df</i> ) 1020 | 0 ± 0 % vs. 2 ± 1 %                  | 26 vs. 27 cells |
|             |               |  | 80 pA: LIII vs. LX   | <b>0.0114</b>     | ( <i>t</i> ) 2.535 ( <i>df</i> ) 1020 | 7 ± 2 % vs. 13 ± 3 %                 | 26 vs. 27 cells |
|             |               |  | 120 pA: LIII vs. LX  | <b>&lt;0.0001</b> | ( <i>t</i> ) 4.576 ( <i>df</i> ) 1020 | 14 ± 2 % vs. 24 ± 2 %                | 26 vs. 27 cells |
|             |               |  | 160 pA: LIII vs. LX  | <b>&lt;0.0001</b> | ( <i>t</i> ) 4.830 ( <i>df</i> ) 1020 | 20 ± 3 % vs. 31 ± 2 %                | 26 vs. 27 cells |
|             |               |  | 200 pA: LIII vs. LX  | <b>&lt;0.0001</b> | ( <i>t</i> ) 5.250 ( <i>df</i> ) 1020 | 26 ± 3 % vs. 38 ± 2 %                | 26 vs. 27 cells |
|             |               |  | 240 pA: LIII vs. LX  | <b>&lt;0.0001</b> | ( <i>t</i> ) 4.893 ( <i>df</i> ) 1020 | 33 ± 2 % vs. 44 ± 2 %                | 26 vs. 27 cells |
|             |               |  | 280 pA: LIII vs. LX  | <b>&lt;0.0001</b> | ( <i>t</i> ) 4.902 ( <i>df</i> ) 1020 | 38 ± 2 % vs. 49 ± 2 %                | 26 vs. 27 cells |
|             |               |  | 320 pA: LIII vs. LX  | <b>&lt;0.0001</b> | ( <i>t</i> ) 4.533 ( <i>df</i> ) 1020 | 44 ± 2 % vs. 54 ± 2 %                | 26 vs. 27 cells |
|             |               |  | 360 pA: LIII vs. LX  | <b>&lt;0.0001</b> | ( <i>t</i> ) 4.160 ( <i>df</i> ) 1020 | 50 ± 2 % vs. 59 ± 2 %                | 26 vs. 27 cells |
|             |               |  | 400 pA: LIII vs. LX  | <b>&lt;0.0001</b> | ( <i>t</i> ) 3.957 ( <i>df</i> ) 1020 | 95 ± 2 % vs. 64 ± 2 %                | 26 vs. 27 cells |
|             |               |  | 440 pA: LIII vs. LX  | <b>0.0002</b>     | ( <i>t</i> ) 3.705 ( <i>df</i> ) 1020 | 61 ± 1 % vs. 69 ± 1 %                | 26 vs. 27 cells |
|             |               |  | 480 pA: LIII vs. LX  | <b>0.0025</b>     | ( <i>t</i> ) 3.036 ( <i>df</i> ) 1020 | 66 ± 1 % vs. 73 ± 1 %                | 26 vs. 27 cells |
|             |               |  | 520 pA: LIII vs. LX  | <b>0.0046</b>     | ( <i>t</i> ) 2.842 ( <i>df</i> ) 1020 | 71 ± 1 % vs. 78 ± 1 %                | 26 vs. 27 cells |
| Figure 2S1B | Mixed-effects |  | 560 pA: LIII vs. LX  | <b>0.0109</b>     | ( <i>t</i> ) 2.551 ( <i>df</i> ) 1020 | 76 ± 1 % vs. 82 ± 1 %                | 26 vs. 27 cells |
|             |               |  | 600 pA: LIII vs. LX  | <b>0.0398</b>     | ( <i>t</i> ) 2.058 ( <i>df</i> ) 1020 | 80 ± 1 % vs. 85 ± 1 %                | 26 vs. 27 cells |
|             |               |  | 640 pA: LIII vs. LX  | 0.1273            | ( <i>t</i> ) 1.526 ( <i>df</i> ) 1020 | 86 ± 1 % vs. 89 ± 1 %                | 26 vs. 27 cells |
|             |               |  | 680 pA: LIII vs. LX  | 0.2524            | ( <i>t</i> ) 1.145 ( <i>df</i> ) 1020 | 91 ± 1 % vs. 93 ± 0 %                | 26 vs. 27 cells |
|             |               |  | 720 pA: LIII vs. LX  | 0.5578            | ( <i>t</i> ) 0.586 ( <i>df</i> ) 1020 | 95 ± 0 % vs. 96 ± 0 %                | 26 vs. 27 cells |
|             |               |  | 760 pA: LIII vs. LX  | >0.9999           | ( <i>t</i> ) 0.000 ( <i>df</i> ) 1020 | 100 ± 0 % vs. 100 ± 0 %              | 26 vs. 27 cells |
|             |               |  | -0 pA: LIII vs. LX   |                   |                                       | 0.00 ± 0.0 mV vs. 0.00 ± 0.0 mV      | 24 vs. 28 cells |
|             |               |  | -40 pA: LIII vs. LX  | 0.6272            | ( <i>t</i> ) 0.486 ( <i>df</i> ) 676  | 0.30 ± 0.1 mV vs. 0.60 ± 0.2 mV      | 24 vs. 28 cells |

|                 |                  |                      |                     |                     |                                   |                                 |                 |
|-----------------|------------------|----------------------|---------------------|---------------------|-----------------------------------|---------------------------------|-----------------|
| Figure 2<br>S1C | Two-way<br>ANOVA | analysis             | -80 pA: LIII vs. LX | 0.9784              | (t) 0.027 (df) 676                | 1.33 ± 0.3 mV vs. 1.35 ± 0.2 mV | 24 vs. 28 cells |
|                 |                  | -120 pA: LIII vs. LX | 0.4429              | (t) 0.768 (df) 676  | 1.85 ± 0.3 mV vs. 2.32 ± 0.3 mV   | 24 vs. 28 cells                 |                 |
|                 |                  | -160 pA: LIII vs. LX | 0.4927              | (t) 0.686 (df) 676  | 2.70 ± 0.4 mV vs. 3.12 ± 0.4 mV   | 24 vs. 28 cells                 |                 |
|                 |                  | -200 pA: LIII vs. LX | 0.4668              | (t) 0.728 (df) 676  | 3.54 ± 0.4 mV vs. 3.98 ± 0.4 mV   | 24 vs. 28 cells                 |                 |
|                 |                  | -240 pA: LIII vs. LX | 0.1982              | (t) 1.288 (df) 676  | 4.22 ± 0.4 mV vs. 4.99 ± 0.4 mV   | 24 vs. 28 cells                 |                 |
|                 |                  | -280 pA: LIII vs. LX | 0.1248              | (t) 1.537 (df) 676  | 4.94 ± 0.4 mV vs. 5.87 ± 0.4 mV   | 24 vs. 28 cells                 |                 |
|                 |                  | -320 pA: LIII vs. LX | <b>0.0381</b>       | (t) 2.078 (df) 676  | 5.44 ± 0.5 mV vs. 6.70 ± 0.5 mV   | 24 vs. 28 cells                 |                 |
|                 |                  | -360 pA: LIII vs. LX | <b>0.0236</b>       | (t) 2.269 (df) 676  | 6.08 ± 0.5 mV vs. 7.45 ± 0.5 mV   | 24 vs. 28 cells                 |                 |
|                 |                  | -400 pA: LIII vs. LX | <b>0.0095</b>       | (t) 2.600 (df) 676  | 6.69 ± 0.5 mV vs. 8.26 ± 0.6 mV   | 24 vs. 28 cells                 |                 |
|                 |                  | -440 pA: LIII vs. LX | <b>0.0155</b>       | (t) 2.426 (df) 676  | 6.58 ± 1.0 mV vs. 9.00 ± 1.1 mV   | 7 vs. 9 cells                   |                 |
|                 |                  | -480 pA: LIII vs. LX | <b>0.0116</b>       | (t) 2.532 (df) 676  | 7.26 ± 0.9 mV vs. 9.76 ± 0.9 mV   | 7 vs. 9 cells                   |                 |
|                 |                  | -520 pA: LIII vs. LX | <b>0.0190</b>       | (t) 2.350 (df) 676  | 8.18 ± 0.7 mV vs. 10.54 ± 0.8 mV  | 7 vs. 9 cells                   |                 |
|                 |                  | -560 pA: LIII vs. LX | <b>0.0494</b>       | (t) 1.969 (df) 676  | 8.77 ± 0.7 mV vs. 10.83 ± 1.0 mV  | 7 vs. 9 cells                   |                 |
|                 |                  | -600 pA: LIII vs. LX | <b>0.0349</b>       | (t) 2.113 (df) 676  | 9.07 ± 0.9 mV vs. 11.24 ± 1.0 mV  | 7 vs. 9 cells                   |                 |
|                 |                  | -640 pA: LIII vs. LX | 0.0576              | (t) 1.902 (df) 676  | 9.57 ± 1.0 mV vs. 11.58 ± 1.1 mV  | 7 vs. 9 cells                   |                 |
|                 |                  | -680 pA: LIII vs. LX | 0.1962              | (t) 1.294 (df) 676  | 10.40 ± 1.0 mV vs. 11.93 ± 0.9 mV | 7 vs. 9 cells                   |                 |
|                 |                  | -720 pA: LIII vs. LX | 0.2001              | (t) 1.283 (df) 676  | 10.70 ± 1.0 mV vs. 12.22 ± 1.0 mV | 7 vs. 9 cells                   |                 |
|                 |                  | -760 pA: LIII vs. LX | 0.5226              | (t) 0.640 (df) 676  | 12.41 ± 1.6 mV vs. 12.42 ± 1.0 mV | 7 vs. 9 cells                   |                 |
|                 |                  | 0 pA: LIII vs. LX    | >0.9999             | (t) 0.000 (df) 1020 | 0.00 ± 0.0 mV vs. 0.00 ± 0.0 mV   | 26 vs. 27 cells                 |                 |
|                 |                  | 40 pA: LIII vs. LX   | 0.7561              | (t) 0.311 (df) 1020 | 0.07 ± 0.1 mV vs. 0.19 ± 0.1 mV   | 26 vs. 27 cells                 |                 |
|                 |                  | 80 pA: LIII vs. LX   | 0.6293              | (t) 0.483 (df) 1020 | 0.91 ± 0.3 mV vs. 1.10 ± 0.3 mV   | 26 vs. 27 cells                 |                 |
|                 |                  | 120 pA: LIII vs. LX  | 0.5389              | (t) 0.615 (df) 1020 | 1.47 ± 0.3 mV vs. 1.71 ± 0.2 mV   | 26 vs. 27 cells                 |                 |
|                 |                  | 160 pA: LIII vs. LX  | 0.7305              | (t) 0.345 (df) 1020 | 1.97 ± 0.3 mV vs. 2.11 ± 0.2 mV   | 26 vs. 27 cells                 |                 |
|                 |                  | 200 pA: LIII vs. LX  | 0.5314              | (t) 0.626 (df) 1020 | 2.37 ± 0.3 mV vs. 2.13 ± 0.2 mV   | 26 vs. 27 cells                 |                 |
|                 |                  | 240 pA: LIII vs. LX  | 0.5345              | (t) 0.621 (df) 1020 | 2.61 ± 0.3 mV vs. 2.37 ± 0.3 mV   | 26 vs. 27 cells                 |                 |
|                 |                  | 280 pA: LIII vs. LX  | 0.5728              | (t) 0.564 (df) 1020 | 2.72 ± 0.3 mV vs. 2.49 ± 0.2 mV   | 26 vs. 27 cells                 |                 |
|                 |                  | 320 pA: LIII vs. LX  | 0.2359              | (t) 1.186 (df) 1020 | 2.95 ± 0.3 mV vs. 2.49 ± 0.2 mV   | 26 vs. 27 cells                 |                 |
|                 |                  | 360 pA: LIII vs. LX  | 0.6282              | (t) 0.485 (df) 1020 | 2.98 ± 0.3 mV vs. 2.80 ± 0.3 mV   | 26 vs. 27 cells                 |                 |
|                 |                  | 400 pA: LIII vs. LX  | 0.3656              | (t) 0.905 (df) 1020 | 3.13 ± 0.3 mV vs. 2.77 ± 0.3 mV   | 26 vs. 27 cells                 |                 |
|                 |                  | 440 pA: LIII vs. LX  | 0.4909              | (t) 0.689 (df) 1020 | 3.12 ± 0.3 mV vs. 2.85 ± 0.3 mV   | 26 vs. 27 cells                 |                 |
|                 |                  | 480 pA: LIII vs. LX  | 0.6834              | (t) 0.408 (df) 1020 | 3.09 ± 0.3 mV vs. 2.93 ± 0.3 mV   | 26 vs. 27 cells                 |                 |
|                 |                  | 520 pA: LIII vs. LX  | 0.8736              | (t) 0.159 (df) 1020 | 3.15 ± 0.3 mV vs. 3.08 ± 0.3 mV   | 26 vs. 27 cells                 |                 |
|                 |                  | 560 pA: LIII vs. LX  | 0.9643              | (t) 0.045 (df) 1020 | 3.20 ± 0.3 mV vs. 3.21 ± 0.4 mV   | 26 vs. 27 cells                 |                 |
|                 |                  | 600 pA: LIII vs. LX  | 0.8260              | (t) 0.220 (df) 1020 | 3.26 ± 0.3 mV vs. 3.35 ± 0.4 mV   | 26 vs. 27 cells                 |                 |
|                 |                  | 640 pA: LIII vs. LX  | 0.7859              | (t) 0.272 (df) 1020 | 3.35 ± 0.3 mV vs. 3.46 ± 0.4 mV   | 26 vs. 27 cells                 |                 |
|                 |                  | 680 pA: LIII vs. LX  | 0.9943              | (t) 0.007 (df) 1020 | 3.43 ± 0.3 mV vs. 3.44 ± 0.4 mV   | 26 vs. 27 cells                 |                 |
|                 |                  | 720 pA: LIII vs. LX  | 0.7041              | (t) 0.380 (df) 1020 | 3.47 ± 0.3 mV vs. 3.62 ± 0.4 mV   | 26 vs. 27 cells                 |                 |
|                 |                  | 760 pA: LIII vs. LX  | 0.8276              | (t) 0.218 (df) 1020 | 3.52 ± 0.3 mV vs. 3.61 ± 0.4 mV   | 26 vs. 27 cells                 |                 |

**Table S3.** Statistical data for in vitro whole cell patch electrophysiology in the adult mouse ( $P > 30$ ), for negative and positive current ramp analysis. Descriptive values are represented as  $\pm$  SEM. Abbreviations: LIII = Lobule III, LIII $\downarrow$  = Lobule III downphase at the current ramp, LIII $\uparrow$  = Lobule III upphase at the current ramp, LX = Lobule X, LX $\downarrow$  = Lobule X downphase at the current ramp, LX $\uparrow$  = Lobule X upphase at the current ramp,  $df$  = degrees of freedom, Hz = hertz, mV = millivolt.

| Related Figure | Test Applied  | Group                    | <i>p</i> -Value   | Population-Value                      | Descriptive Values                  | Population Size |
|----------------|---------------|--------------------------|-------------------|---------------------------------------|-------------------------------------|-----------------|
| Figure 3B1     | Two-way ANOVA | -0 pA: LIII vs. LX       |                   |                                       | 0.00 ± 0.0 mV vs. 0.00 ± 0.0 mV     | 23 vs. 28 cells |
|                |               | -0 pA: LIII vs. LX       | 0.9981            | ( <i>t</i> ) 0.002 ( <i>df</i> ) 1666 | 0.06 ± 0.0 mV vs. 0.06 ± 0.07 mV    | 23 vs. 28 cells |
|                |               | -0 pA: LIII vs. LX       | 0.9658            | ( <i>t</i> ) 0.043 ( <i>df</i> ) 1666 | 0.02 ± 0.0 mV vs. -0.02 ± 0.1 mV    | 23 vs. 28 cells |
|                |               | -0 pA: LIII vs. LX       | 0.9491            | ( <i>t</i> ) 0.064 ( <i>df</i> ) 1666 | -0.04 ± 0.0 mV vs. 0.02 ± 0.1 mV    | 23 vs. 28 cells |
|                |               | -0 pA: LIII vs. LX       | 0.9609            | ( <i>t</i> ) 0.049 ( <i>df</i> ) 1666 | 0.00 ± 0.1 mV vs. 0.04 ± 0.1 mV     | 23 vs. 28 cells |
|                |               | -0 pA: LIII vs. LX       | 0.9969            | ( <i>t</i> ) 0.004 ( <i>df</i> ) 1666 | -0.02 ± 0.1 mV vs. -0.02 ± 0.1 mV   | 23 vs. 28 cells |
|                |               | -0 pA: LIII vs. LX       | 0.9518            | ( <i>t</i> ) 0.060 ( <i>df</i> ) 1666 | -0.09 ± 0.1 mV vs. -0.04 ± 0.1 mV   | 23 vs. 28 cells |
|                |               | -0 pA: LIII vs. LX       | 0.8012            | ( <i>t</i> ) 0.252 ( <i>df</i> ) 1666 | -0.10 ± 0.1 mV vs. 0.10 ± 0.1 mV    | 23 vs. 28 cells |
|                |               | -0 pA: LIII vs. LX       | 0.9786            | ( <i>t</i> ) 0.027 ( <i>df</i> ) 1666 | -0.11 ± 0.1 mV vs. -0.13 ± 0.1 mV   | 23 vs. 28 cells |
|                |               | -0 pA: LIII vs. LX       | 0.9809            | ( <i>t</i> ) 0.024 ( <i>df</i> ) 1666 | -0.16 ± 0.1 mV vs. -0.14 ± 0.1 mV   | 23 vs. 28 cells |
|                |               | -40 pA: LIII vs. LX      | 0.7749            | ( <i>t</i> ) 0.286 ( <i>df</i> ) 1666 | -0.56 ± 0.1 mV vs. -0.79 ± 0.1 mV   | 23 vs. 28 cells |
|                |               | -80 pA: LIII vs. LX      | 0.4059            | ( <i>t</i> ) 0.831 ( <i>df</i> ) 1666 | -3.53 ± 0.8 mV vs. -2.86 ± 0.5 mV   | 23 vs. 28 cells |
|                |               | -120 pA: LIII vs. LX     | 0.1539            | ( <i>t</i> ) 1.426 ( <i>df</i> ) 1666 | -11.03 ± 1.2 mV vs. -9.89 ± 1.2 mV  | 23 vs. 28 cells |
|                |               | -160 pA: LIII vs. LX     | 0.3807            | ( <i>t</i> ) 0.877 ( <i>df</i> ) 1666 | -15.77 ± 0.8 mV vs. -16.47 ± 1.1 mV | 23 vs. 28 cells |
|                |               | -200 pA: LIII vs. LX     | <u>0.0019</u>     | ( <i>t</i> ) 3.113 ( <i>df</i> ) 1666 | -17.77 ± 0.8 mV vs. -20.26 ± 0.7mV  | 23 vs. 28 cells |
|                |               | -240 pA: LIII vs. LX     | <u>0.0005</u>     | ( <i>t</i> ) 3.481 ( <i>df</i> ) 1666 | -19.94 ± 0.7 mV vs. -22.73 ± 0.8 mV | 23 vs. 28 cells |
|                |               | -280 pA: LIII vs. LX     | <u>0.0002</u>     | ( <i>t</i> ) 3.781 ( <i>df</i> ) 1666 | -21.87 ± 0.8 mV vs. -24.90 ± 0.9 mV | 23 vs. 28 cells |
|                |               | -320 pA: LIII vs. LX     | <u>&lt;0.0001</u> | ( <i>t</i> ) 4.025 ( <i>df</i> ) 1666 | -23.35 ± 0.8 mV vs. -26.57 ± 0.9 mV | 23 vs. 28 cells |
|                |               | -280 pA: LIII vs. LX     | <u>0.0023</u>     | ( <i>t</i> ) 3.059 ( <i>df</i> ) 1666 | -20.95 ± 0.7 mV vs. -23.41 ± 0.9 mV | 23 vs. 28 cells |
|                |               | -240 pA: LIII vs. LX     | <u>0.0146</u>     | ( <i>t</i> ) 2.444 ( <i>df</i> ) 1666 | -19.19 ± 0.7 mV vs. -21.15 ± 0.8 mV | 23 vs. 28 cells |
|                |               | -200 pA: LIII vs. LX     | 0.1012            | ( <i>t</i> ) 1.640 ( <i>df</i> ) 1666 | -17.31 ± 0.7 mV vs. -18.63 ± 0.8 mV | 23 vs. 28 cells |
|                |               | -160 pA: LIII vs. LX     | 0.2155            | ( <i>t</i> ) 1.239 ( <i>df</i> ) 1666 | -15.14 ± 0.7 mV vs. -16.13 ± 0.8 mV | 23 vs. 28 cells |
|                |               | -120 pA: LIII vs. LX     | 0.4816            | ( <i>t</i> ) 0.704 ( <i>df</i> ) 1666 | -12.73 ± 0.7 mV vs. -13.30 ± 0.7 mV | 23 vs. 28 cells |
|                |               | -80 pA: LIII vs. LX      | 0.9268            | ( <i>t</i> ) 0.092 ( <i>df</i> ) 1666 | -10.24 ± 0.7 mV vs. -10.31 ± 0.7 mV | 23 vs. 28 cells |
|                |               | -40 pA: LIII vs. LX      | 0.3062            | ( <i>t</i> ) 1.024 ( <i>df</i> ) 1666 | -7.48 ± 0.7 mV vs. -6.66 ± 0.8 mV   | 23 vs. 28 cells |
|                |               | -0 pA: LIII vs. LX       | 0.8513            | ( <i>t</i> ) 0.188 ( <i>df</i> ) 1666 | -2.29 ± 0.6 mV vs. -2.44 ± 0.7 mV   | 23 vs. 28 cells |
|                |               | -0 pA: LIII vs. LX       | 0.3672            | ( <i>t</i> ) 0.902 ( <i>df</i> ) 1666 | -0.81 ± 0.4 mV vs. -1.53 ± 0.6 mV   | 23 vs. 28 cells |
|                |               | -0 pA: LIII vs. LX       | 0.5021            | ( <i>t</i> ) 0.671 ( <i>df</i> ) 1666 | -0.48 ± 0.4 mV vs. -1.02 ± 0.5 mV   | 23 vs. 28 cells |
|                |               | -0 pA: LIII vs. LX       | 0.5332            | ( <i>t</i> ) 0.623 ( <i>df</i> ) 1666 | -0.19 ± 0.2 mV vs. -0.69 ± 0.5 mV   | 23 vs. 28 cells |
|                |               | -0 pA: LIII vs. LX       | 0.5857            | ( <i>t</i> ) 0.545 ( <i>df</i> ) 1666 | -0.09 ± 0.2 mV vs. -0.53 ± 0.4 mV   | 23 vs. 28 cells |
|                |               | -0 pA: LIII vs. LX       | 0.5030            | ( <i>t</i> ) 0.670 ( <i>df</i> ) 1666 | 0.12 ± 0.2 mV vs. -0.41 ± 0.4 mV    | 23 vs. 28 cells |
|                |               | -0 pA: LIII vs. LX       | 0.6352            | ( <i>t</i> ) 0.475 ( <i>df</i> ) 1666 | 0.12 ± 0.1 mV vs. -0.26 ± 0.3 mV    | 23 vs. 28 cells |
|                |               | -0 pA: LIII vs. LX       | 0.7281            | ( <i>t</i> ) 0.348 ( <i>df</i> ) 1666 | 0.11 ± 0.1 mV vs. -0.17 ± 0.2 mV    | 23 vs. 28 cells |
|                |               | -0 pA: LIII vs. LX       | 0.9379            | ( <i>t</i> ) 0.078 ( <i>df</i> ) 1666 | 0.19 ± 0.1 mV vs. 0.13 ± 0.2 mV     | 23 vs. 28 cells |
| Figure 3B2     | Two-way ANOVA | -0 pA: LIII↓ vs. LIII↑   | 0.7678            | ( <i>t</i> ) 0.276 ( <i>df</i> ) 347  | 0.06 ± 0.0 mV vs. 0.19 ± 0.1 mV     | 23 cells        |
|                |               | -0 pA: LIII↓ vs. LIII↑   | 0.8409            | ( <i>t</i> ) 0.188 ( <i>df</i> ) 347  | 0.02 ± 0.0 mV vs. 0.11 ± 0.1 mV     |                 |
|                |               | -0 pA: LIII↓ vs. LIII↑   | 0.7312            | ( <i>t</i> ) 0.321 ( <i>df</i> ) 347  | -0.04 ± 0.0 mV vs. 0.12 ± 0.1 mV    |                 |
|                |               | -0 pA: LIII↓ vs. LIII↑   | 0.7915            | ( <i>t</i> ) 0.247 ( <i>df</i> ) 347  | 0.00 ± 0.1 mV vs. 0.12 ± 0.2 mV     |                 |
|                |               | -0 pA: LIII↓ vs. LIII↑   | 0.8788            | ( <i>t</i> ) 0.143 ( <i>df</i> ) 347  | -0.02 ± 0.1 mV vs. -0.09 ± 0.2 mV   |                 |
|                |               | -0 pA: LIII↓ vs. LIII↑   | 0.8116            | ( <i>t</i> ) 0.223 ( <i>df</i> ) 347  | -0.09 ± 0.1 mV vs. -0.19 ± 0.2 mV   |                 |
|                |               | -0 pA: LIII↓ vs. LIII↑   | 0.3987            | ( <i>t</i> ) 0.789 ( <i>df</i> ) 347  | -0.10 ± 0.1 mV vs. -0.49 ± 0.4 mV   |                 |
|                |               | -0 pA: LIII↓ vs. LIII↑   | 0.1200            | ( <i>t</i> ) 1.455 ( <i>df</i> ) 347  | -0.11 ± 0.1 mV vs. -0.81 ± 0.4 mV   |                 |
|                |               | -0 pA: LIII↓ vs. LIII↑   | <u>&lt;0.0001</u> | ( <i>t</i> ) 4.433 ( <i>df</i> ) 347  | -0.16 ± 0.1 mV vs. -2.29 ± 0.5 mV   |                 |
|                |               | -40 pA: LIII↓ vs. LIII↑  | <u>&lt;0.0001</u> | ( <i>t</i> ) 14.36 ( <i>df</i> ) 347  | -0.56 ± 0.1 mV vs. -7.48 ± 0.6 mV   |                 |
|                |               | -80 pA: LIII↓ vs. LIII↑  | <u>&lt;0.0001</u> | ( <i>t</i> ) 13.92 ( <i>df</i> ) 347  | -3.53 ± 0.1 mV vs. -10.24 ± 0.7 mV  |                 |
|                |               | -120 pA: LIII↓ vs. LIII↑ | <u>0.0002</u>     | ( <i>t</i> ) 3.521 ( <i>df</i> ) 347  | -11.03 ± 1.2 mV vs. -12.73 ± 0.7 mV |                 |
|                |               | -160 pA: LIII↓ vs. LIII↑ | 0.1629            | ( <i>t</i> ) 1.306 ( <i>df</i> ) 347  | -15.77 ± 0.8 mV vs. -15.14 ± 0.7 mV |                 |
|                |               | -200 pA: LIII↓ vs. LIII↑ | 0.3150            | ( <i>t</i> ) 0.937 ( <i>df</i> ) 347  | -17.77 ± 0.8 mV vs. -17.31 ± 0.7 mV |                 |
|                |               | -240 pA: LIII↓ vs. LIII↑ | 0.0964            | ( <i>t</i> ) 1.556 ( <i>df</i> ) 347  | -19.94 ± 0.7 mV vs. -19.19 ± 0.7 mV |                 |
|                |               | -280 pA: LIII↓ vs. LIII↑ | <u>0.0431</u>     | ( <i>t</i> ) 1.895 ( <i>df</i> ) 347  | -21.87 ± 0.8 mV vs. -20.95 ± 0.7 mV |                 |
|                |               | -320 pA                  |                   | -23.35 ± 0.8 mV                       |                                     |                 |
| Figure 3B3     | Two-way ANOVA | -0 pA: LX↓ vs. LX↑       | 0.8868            | ( <i>t</i> ) 0.142 ( <i>df</i> ) 432  | 0.06 ± 0.1 mV vs. 0.13 ± 0.2 mV     | 28 cells        |
|                |               | -0 pA: LX↓ vs. LX↑       | 0.7625            | ( <i>t</i> ) 0.302 ( <i>df</i> ) 432  | -0.02 ± 0.1 mV vs. -0.17 ± 0.2 mV   |                 |
|                |               | -0 pA: LX↓ vs. LX↑       | 0.5870            | ( <i>t</i> ) 0.544 ( <i>df</i> ) 432  | 0.02 ± 0.1 mV vs. -0.26 ± 0.3 mV    |                 |
|                |               | -0 pA: LX↓ vs. LX↑       | 0.3697            | ( <i>t</i> ) 0.898 ( <i>df</i> ) 432  | 0.04 ± 0.1 mV vs. -0.41 ± 0.4 mV    |                 |
|                |               | -0 pA: LX↓ vs. LX↑       | 0.3242            | ( <i>t</i> ) 0.987 ( <i>df</i> ) 432  | -0.02 ± 0.1 mV vs. -0.53 ± 0.4 mV   |                 |
|                |               | -0 pA: LX↓ vs. LX↑       | 0.1987            | ( <i>t</i> ) 1.287 ( <i>df</i> ) 432  | -0.04 ± 0.1 mV vs. -0.69 ± 0.5 mV   |                 |

|            |                        |                          |                   |                     |                                     |                 |
|------------|------------------------|--------------------------|-------------------|---------------------|-------------------------------------|-----------------|
|            |                        | -0 pA: LX↓ vs. LX↑       | <b>0.0283</b>     | (t) 2.201 (df) 432  | 0.10 ± 0.1 mV vs. -1.02 ± 0.5 mV    |                 |
|            |                        | -0 pA: LX↓ vs. LX↑       | <b>0.0061</b>     | (t) 2.756 (df) 432  | -0.13 ± 0.1 mV vs. -1.53 ± 0.6 mV   |                 |
|            |                        | -0 pA: LX↓ vs. LX↑       | <b>&lt;0.0001</b> | (t) 4.531 (df) 432  | -0.14 ± 0.1 mV vs. -2.44 ± 0.7 mV   |                 |
|            |                        | -40 pA: LX↓ vs. LX↑      | <b>&lt;0.0001</b> | (t) 11.540 (df) 432 | -0.79 ± 0.1 mV vs. -6.66 ± 0.8 mV   |                 |
|            |                        | -80 pA: LX↓ vs. LX↑      | <b>&lt;0.0001</b> | (t) 14.630 (df) 432 | -2.86 ± 0.6 mV vs. -10.31 ± 0.7 mV  |                 |
|            |                        | -120 pA: LX↓ vs. LX↑     | <b>&lt;0.0001</b> | (t) 6.689 (df) 432  | -9.89 ± 1.2 mV vs. -13.30 ± 0.7 mV  |                 |
|            |                        | -160 pA: LX↓ vs. LX↑     | 0.5055            | (t) 0.666 (df) 432  | -16.47 ± 1.1 mV vs. -16.13 ± 0.8 mV |                 |
|            |                        | -200 pA: LX↓ vs. LX↑     | <b>0.0014</b>     | (t) 3.208 (df) 432  | -20.26 ± 0.7 mV vs. -18.83 ± 0.8 mV |                 |
|            |                        | -240 pA: LX↓ vs. LX↑     | <b>0.0020</b>     | (t) 3.106 (df) 432  | -22.73 ± 0.8 mV vs. -21.15 ± 0.8 mV |                 |
|            |                        | -280 pA: LX↓ vs. LX↑     | <b>0.0035</b>     | (t) 2.933 (df) 432  | -24.89 ± 0.9 mV vs. -23.41 ± 0.9 mV |                 |
|            |                        | -320 pA                  |                   |                     | -26.54 ± 0.9 mV                     |                 |
| Figure 3C1 | Two-way ANOVA          | -0 pA: LIII vs. LX       | <b>0.0412</b>     | (t) 2.043 (df) 1666 | 39.82 ± 6.2 Hz vs. 29.31 ± 3.3 Hz   | 23 vs. 28 cells |
|            |                        | -0 pA: LIII vs. LX       | <b>0.0252</b>     | (t) 2.240 (df) 1666 | 41.01 ± 6.3 Hz vs. 29.50 ± 3.3 Hz   | 23 vs. 28 cells |
|            |                        | -0 pA: LIII vs. LX       | <b>0.0287</b>     | (t) 2.189 (df) 1666 | 41.12 ± 6.4 Hz vs. 29.87 ± 3.4 Hz   | 23 vs. 28 cells |
|            |                        | -0 pA: LIII vs. LX       | <b>0.0264</b>     | (t) 2.223 (df) 1666 | 41.44 ± 6.4 Hz vs. 30.02 ± 3.4 Hz   | 23 vs. 28 cells |
|            |                        | -0 pA: LIII vs. LX       | <b>0.0198</b>     | (t) 2.33 (df) 1666  | 42.24 ± 6.5 Hz vs. 30.00 ± 3.4 Hz   | 23 vs. 28 cells |
|            |                        | -0 pA: LIII vs. LX       | <b>0.0163</b>     | (t) 2.404 (df) 1666 | 42.62 ± 6.5 Hz vs. 30.24 ± 3.4 Hz   | 23 vs. 28 cells |
|            |                        | -0 pA: LIII vs. LX       | <b>0.0162</b>     | (t) 2.407 (df) 1666 | 42.76 ± 6.5 Hz vs. 30.44 ± 3.5 Hz   | 23 vs. 28 cells |
|            |                        | -0 pA: LIII vs. LX       | <b>0.0166</b>     | (t) 2.397 (df) 1666 | 43.01 ± 6.6 Hz vs. 30.57 ± 3.4 Hz   | 23 vs. 28 cells |
|            |                        | -0 pA: LIII vs. LX       | <b>0.0156</b>     | (t) 2.421 (df) 1666 | 43.05 ± 6.6 Hz vs. 30.30 ± 3.5 Hz   | 23 vs. 28 cells |
|            |                        | -0 pA: LIII vs. LX       | <b>0.0129</b>     | (t) 2.488 (df) 1666 | 32.05 ± 6.1 Hz vs. 23.70 ± 3.3 Hz   | 23 vs. 28 cells |
|            |                        | -40 pA: LIII vs. LX      | 0.1045            | (t) 1.624 (df) 1666 | 14.76 ± 4.7 Hz vs. 11.53 ± 2.9 Hz   | 23 vs. 28 cells |
|            |                        | -80 pA: LIII vs. LX      | 0.5305            | (t) 0.627 (df) 1666 | 4.68 ± 2.18 Hz vs. 4.21 ± 2.0 Hz    | 23 vs. 28 cells |
|            |                        | -120 pA: LIII vs. LX     | 0.9267            | (t) 0.091 (df) 1666 | 0.46 ± 0.38 Hz vs. 1.30 ± 0.9 Hz    | 23 vs. 28 cells |
|            |                        | -160 pA: LIII vs. LX     | 0.8696            | (t) 0.164 (df) 1666 | 0.00 ± 0.0 Hz vs. 0.09 ± 0.1 Hz     | 23 vs. 28 cells |
|            |                        | -200 pA: LIII vs. LX     | 0.9861            | (t) 0.017 (df) 1666 | 0.00 ± 0.0 Hz vs. 0.00 ± 0.0 Hz     | 23 vs. 28 cells |
|            |                        | -240 pA: LIII vs. LX     | >0.9999           | (t) 0.000 (df) 1666 | 0.00 ± 0.0 Hz vs. 0.00 ± 0.0 Hz     | 23 vs. 28 cells |
|            |                        | -280 pA: LIII vs. LX     | >0.9999           | (t) 0.000 (df) 1666 | 0.00 ± 0.0 Hz vs. 0.00 ± 0.0 Hz     | 23 vs. 28 cells |
|            |                        | -320 pA: LIII vs. LX     | >0.9999           | (t) 0.000 (df) 1666 | 0.00 ± 0.0 Hz vs. 0.00 ± 0.0 Hz     | 23 vs. 28 cells |
|            |                        | -280 pA: LIII vs. LX     | >0.9999           | (t) 0.000 (df) 1666 | 0.00 ± 0.0 Hz vs. 0.00 ± 0.0 Hz     | 23 vs. 28 cells |
|            |                        | -240 pA: LIII vs. LX     | >0.9999           | (t) 0.000 (df) 1666 | 0.00 ± 0.0 Hz vs. 0.00 ± 0.0 Hz     | 23 vs. 28 cells |
|            |                        | -200 pA: LIII vs. LX     | >0.9999           | (t) 0.000 (df) 1666 | 0.00 ± 0.0 Hz vs. 0.00 ± 0.0 Hz     | 23 vs. 28 cells |
|            |                        | -160 pA: LIII vs. LX     | >0.9999           | (t) 0.000 (df) 1666 | 0.00 ± 0.0 Hz vs. 0.00 ± 0.0 Hz     | 23 vs. 28 cells |
|            |                        | -120 pA: LIII vs. LX     | 0.8919            | (t) 0.136 (df) 1666 | 0.70 ± 0.6 Hz vs. 0.00 ± 0.0 Hz     | 23 vs. 28 cells |
|            |                        | -80 pA: LIII vs. LX      | 0.7853            | (t) 0.273 (df) 1666 | 1.47 ± 1.1 Hz vs. 0.07 ± 0.1 Hz     | 23 vs. 28 cells |
|            |                        | -40 pA: LIII vs. LX      | 0.8375            | (t) 0.205 (df) 1666 | 3.93 ± 1.9 Hz vs. 2.88 ± 1.4 Hz     | 23 vs. 28 cells |
|            |                        | -0 pA: LIII vs. LX       | 0.1714            | (t) 1.368 (df) 1666 | 17.89 ± 5.3 Hz vs. 10.86 ± 2.3 Hz   | 23 vs. 28 cells |
|            |                        | -0 pA: LIII vs. LX       | 0.1105            | (t) 1.597 (df) 1666 | 25.49 ± 5.5 Hz vs. 17.28 ± 2.9 Hz   | 23 vs. 28 cells |
|            |                        | -0 pA: LIII vs. LX       | 0.1499            | (t) 1.441 (df) 1666 | 27.46 ± 5.5 Hz vs. 20.06 ± 3.1 Hz   | 23 vs. 28 cells |
|            |                        | -0 pA: LIII vs. LX       | 0.1471            | (t) 1.450 (df) 1666 | 29.65 ± 5.6 Hz vs. 22.19 ± 3.1 Hz   | 23 vs. 28 cells |
|            |                        | -0 pA: LIII vs. LX       | 0.1142            | (t) 1.580 (df) 1666 | 31.50 ± 5.6 Hz vs. 23.38 ± 3.1 Hz   | 23 vs. 28 cells |
|            |                        | -0 pA: LIII vs. LX       | 0.1240            | (t) 1.539 (df) 1666 | 32.22 ± 5.7 Hz vs. 24.31 ± 3.0 Hz   | 23 vs. 28 cells |
|            |                        | -0 pA: LIII vs. LX       | 0.0728            | (t) 1.795 (df) 1666 | 34.99 ± 5.7 Hz vs. 25.77 ± 3.0 Hz   | 23 vs. 28 cells |
|            |                        | -0 pA: LIII vs. LX       | 0.0583            | (t) 1.895 (df) 1666 | 36.00 ± 5.9 Hz vs. 26.26 ± 3.0 Hz   | 23 vs. 28 cells |
|            |                        | -0 pA: LIII vs. LX       | 0.0602            | (t) 1.881 (df) 1666 | 37.28 ± 6.1 Hz vs. 27.61 ± 3.0 Hz   | 23 vs. 28 cells |
| Figure 3C2 | Mixed-effects analysis | -0 pA: LIII↓ vs. LIII↑   | 0.0891            | (t) 1.705 (df) 352  | 41.01 ± 6.3 Hz vs. 37.28 ± 6.1 Hz   |                 |
|            |                        | -0 pA: LIII↓ vs. LIII↑   | <b>0.0200</b>     | (t) 2.337 (df) 352  | 41.12 ± 6.4 Hz vs. 36.00 ± 5.9 Hz   |                 |
|            |                        | -0 pA: LIII↓ vs. LIII↑   | <b>0.0167</b>     | (t) 2.943 (df) 352  | 41.44 ± 6.4 Hz vs. 34.99 ± 5.7 Hz   |                 |
|            |                        | -0 pA: LIII↓ vs. LIII↑   | <b>0.0002</b>     | (t) 4.568 (df) 352  | 42.24 ± 6.5 Hz vs. 32.22 ± 5.7 Hz   |                 |
|            |                        | -0 pA: LIII↓ vs. LIII↑   | <b>&lt;0.0001</b> | (t) 4.949 (df) 352  | 42.35 ± 6.4 Hz vs. 31.50 ± 5.6 Hz   |                 |
|            |                        | -0 pA: LIII↓ vs. LIII↑   | <b>&lt;0.0001</b> | (t) 5.917 (df) 352  | 42.62 ± 6.5 Hz vs. 29.65 ± 5.6 Hz   |                 |
|            |                        | -0 pA: LIII↓ vs. LIII↑   | <b>&lt;0.0001</b> | (t) 6.979 (df) 352  | 42.76 ± 6.5 Hz vs. 27.46 ± 5.5 Hz   |                 |
|            |                        | -0 pA: LIII↓ vs. LIII↑   | <b>&lt;0.0001</b> | (t) 7.990 (df) 352  | 43.01 ± 6.6 Hz vs. 25.49 ± 5.5 Hz   |                 |
|            |                        | -0 pA: LIII↓ vs. LIII↑   | <b>&lt;0.0001</b> | (t) 11.48 (df) 352  | 43.05 ± 6.6 Hz vs. 17.89 ± 5.3 Hz   | 23 cells        |
|            |                        | -40 pA: LIII↓ vs. LIII↑  | <b>&lt;0.0001</b> | (t) 12.83 (df) 352  | 32.05 ± 6.1 Hz vs. 3.93 ± 1.9 Hz    |                 |
|            |                        | -80 pA: LIII↓ vs. LIII↑  | <b>&lt;0.0001</b> | (t) 6.061 (df) 352  | 14.76 ± 4.7 Hz vs. 1.47 ± 1.1 Hz    |                 |
|            |                        | -120 pA: LIII↓ vs. LIII↑ | 0.0700            | (t) 1.817 (df) 352  | 4.68 ± 2.2 Hz vs. 0.70 ± 0.6 Hz     |                 |
|            |                        | -160 pA: LIII↓ vs. LIII↑ | 0.8341            | (t) 0.210 (df) 352  | 0.46 ± 0.4 Hz vs. 0.00 ± 0.00 Hz    |                 |
|            |                        | -200 pA: LIII↓ vs. LIII↑ | >0.9999           | (t) 0.000 (df) 352  | 0.00 ± 0.0 Hz vs. 0.00 ± 0.00 Hz    |                 |
|            |                        | -240 pA: LIII↓ vs. LIII↑ | >0.9999           | (t) 0.000 (df) 352  | 0.00 ± 0.0 Hz vs. 0.00 ± 0.00 Hz    |                 |
|            |                        | -280 pA: LIII↓ vs. LIII↑ | >0.9999           | (t) 0.000 (df) 352  | 0.00 ± 0.0 Hz vs. 0.00 ± 0.00 Hz    |                 |
| Figure 3C3 | Mixed-effects          | -320 pA                  |                   |                     | 0.00 ± 0.0 Hz                       |                 |
|            |                        | -0 pA: LX↓ vs. LX↑       | 0.2304            | (t) 0.836 (df) 459  | 29.50 ± 3.3 Hz vs. 27.61 ± 3.0 Hz   | 28 cells        |
|            |                        | -0 pA: LX↓ vs. LX↑       | <b>0.0222</b>     | (t) 1.597 (df) 459  | 29.87 ± 3.4 Hz vs. 26.26 ± 3.0 Hz   |                 |

|            |                         |                   |                     |                                   |                 |
|------------|-------------------------|-------------------|---------------------|-----------------------------------|-----------------|
| analysis   | -0 pA: LX↓ vs. LX↑      | <b>0.0071</b>     | (t) 1.882 (df) 459  | 30.02 ± 3.4 Hz vs. 25.77 ± 3.0 Hz |                 |
|            | -0 pA: LX↓ vs. LX↑      | <b>0.0002</b>     | (t) 2.628 (df) 459  | 30.25 ± 3.4 Hz vs. 24.31 ± 3.0 Hz |                 |
|            | -0 pA: LX↓ vs. LX↑      | <b>&lt;0.0001</b> | (t) 2.928 (df) 459  | 30.00 ± 3.4 Hz vs. 23.38 ± 3.1 Hz |                 |
|            | -0 pA: LX↓ vs. LX↑      | <b>&lt;0.0001</b> | (t) 3.563 (df) 459  | 30.24 ± 3.5 Hz vs. 22.19 ± 3.1 Hz |                 |
|            | -0 pA: LX↓ vs. LX↑      | <b>&lt;0.0001</b> | (t) 4.594 (df) 459  | 30.43 ± 3.4 Hz vs. 20.06 ± 3.1 Hz |                 |
|            | -0 pA: LX↓ vs. LX↑      | <b>&lt;0.0001</b> | (t) 5.877 (df) 459  | 30.57 ± 3.5 Hz vs. 17.28 ± 2.9 Hz |                 |
|            | -0 pA: LX↓ vs. LX↑      | <b>&lt;0.0001</b> | (t) 8.585 (df) 459  | 30.26 ± 3.5 Hz vs. 10.86 ± 2.3 Hz |                 |
|            | -40 pA: LX↓ vs. LX↑     | <b>&lt;0.0001</b> | (t) 9.216 (df) 459  | 23.70 ± 3.3 Hz vs. 2.88 ± 1.4 Hz  |                 |
|            | -80 pA: LX↓ vs. LX↑     | <b>&lt;0.0001</b> | (t) 5.072 (df) 459  | 11.53 ± 2.9 Hz vs. 0.07 ± 0.1 Hz  |                 |
|            | -120 pA: LX↓ vs. LX↑    | <b>0.0077</b>     | (t) 1.863 (df) 459  | 4.21 ± 2.0 Hz vs. 0.00 ± 0.0 Hz   |                 |
|            | -160 pA: LX↓ vs. LX↑    | 0.4075            | (t) 0.577 (df) 459  | 1.30 ± 0.9 Hz vs. 0.00 ± 0.0 Hz   |                 |
|            | -200 pA: LX↓ vs. LX↑    | 0.9547            | (t) 0.040 (df) 459  | 0.09 ± 0.1 Hz vs. 0.00 ± 0.0 Hz   |                 |
|            | -240 pA: LX↓ vs. LX↑    | >0.9999           | (t) 0.000 (df) 459  | 0.00 ± 0.0 Hz vs. 0.00 ± 0.0 Hz   |                 |
|            | -280 pA: LX↓ vs. LX↑    | >0.9999           | (t) 0.000 (df) 459  | 0.00 ± 0.0 Hz vs. 0.00 ± 0.0 Hz   |                 |
|            | -320 pA                 |                   |                     | 0.00 ± 0.0 Hz                     |                 |
| Figure 3D1 | 0 pA: LIII vs. LX       |                   |                     | 0.00 ± 0.0 mV vs. 0.00 ± 0.0 mV   | 26 vs. 27 cells |
|            | 0 pA: LIII vs. LX       | 0.8868            | (t) 0.142 (df) 1694 | 0.00 ± 0.0 mV vs. 0.02 ± 0.0 mV   | 26 vs. 27 cells |
|            | 0 pA: LIII vs. LX       | 0.9017            | (t) 0.124 (df) 1694 | -0.01 ± 0.0 mV vs. 0.02 ± 0.0 mV  | 26 vs. 27 cells |
|            | 0 pA: LIII vs. LX       | 0.8848            | (t) 0.145 (df) 1694 | 0.00 ± 0.0 mV vs. 0.02 ± 0.0 mV   | 26 vs. 27 cells |
|            | 0 pA: LIII vs. LX       | 0.9079            | (t) 0.116 (df) 1694 | 0.01 ± 0.0 mV vs. 0.05 ± 0.0 mV   | 26 vs. 27 cells |
|            | 0 pA: LIII vs. LX       | 0.9282            | (t) 0.090 (df) 1694 | 0.01 ± 0.0 mV vs. 0.07 ± 0.0 mV   | 26 vs. 27 cells |
|            | 0 pA: LIII vs. LX       | 0.911             | (t) 0.117 (df) 1694 | 0.03 ± 0.0 mV vs. 0.10 ± 0.0 mV   | 26 vs. 27 cells |
|            | 0 pA: LIII vs. LX       | 0.8817            | (t) 0.149 (df) 1694 | 0.03 ± 0.0 mV vs. 0.13 ± 0.0 mV   | 26 vs. 27 cells |
|            | 0 pA: LIII vs. LX       | 0.9276            | (t) 0.091 (df) 1694 | 0.04 ± 0.0 mV vs. 0.10 ± 0.0 mV   | 26 vs. 27 cells |
|            | 0 pA: LIII vs. LX       | 0.8813            | (t) 0.149 (df) 1694 | 0.04 ± 0.0 mV vs. 0.14 ± 0.0 mV   | 26 vs. 27 cells |
|            | 40 pA: LIII vs. LX      | 0.7201            | (t) 0.359 (df) 1694 | 0.52 ± 0.1 mV vs. 0.76 ± 0.2 mV   | 26 vs. 27 cells |
|            | 80 pA: LIII vs. LX      | <b>0.0412</b>     | (t) 2.043 (df) 1694 | 3.83 ± 0.1 mV vs. 5.18 ± 0.3 mV   | 26 vs. 27 cells |
|            | 120 pA: LIII vs. LX     | <b>0.0331</b>     | (t) 2.132 (df) 1694 | 7.82 ± 0.6 mV vs. 9.23 ± 0.5 mV   | 26 vs. 27 cells |
|            | 160 pA: LIII vs. LX     | <b>0.0179</b>     | (t) 2.371 (df) 1694 | 11.50 ± 0.6 mV vs. 13.06 ± 0.5 mV | 26 vs. 27 cells |
|            | 200 pA: LIII vs. LX     | 0.3822            | (t) 0.874 (df) 1694 | 14.33 ± 0.6 mV vs. 14.91 ± 0.5 mV | 26 vs. 27 cells |
|            | 240 pA: LIII vs. LX     | 0.3957            | (t) 0.850 (df) 1694 | 15.74 ± 0.5 mV vs. 16.30 ± 0.7 mV | 26 vs. 27 cells |
|            | 280 pA: LIII vs. LX     | 0.9212            | (t) 0.099 (df) 1694 | 16.40 ± 0.5 mV vs. 16.46 ± 0.7 mV | 26 vs. 27 cells |
|            | 320 pA: LIII vs. LX     | 0.3040            | (t) 1.028 (df) 1694 | 16.34 ± 0.6 mV vs. 15.66 ± 0.9 mV | 26 vs. 27 cells |
|            | 280 pA: LIII vs. LX     | 0.7905            | (t) 0.266 (df) 1694 | 16.64 ± 0.6 mV vs. 16.46 ± 0.7 mV | 26 vs. 27 cells |
|            | 240 pA: LIII vs. LX     | 0.8633            | (t) 0.172 (df) 1694 | 16.20 ± 0.5 mV vs. 16.09 ± 0.7 mV | 26 vs. 27 cells |
|            | 200 pA: LIII vs. LX     | 0.6796            | (t) 0.413 (df) 1694 | 15.01 ± 0.5 mV vs. 15.28 ± 0.7 mV | 26 vs. 27 cells |
|            | 160 pA: LIII vs. LX     | <b>0.0445</b>     | (t) 2.011 (df) 1694 | 13.24 ± 0.7 mV vs. 14.57 ± 0.7 mV | 26 vs. 27 cells |
|            | 120 pA: LIII vs. LX     | <b>0.0157</b>     | (t) 2.419 (df) 1694 | 11.43 ± 0.9 mV vs. 13.03 ± 0.8 mV | 26 vs. 27 cells |
|            | 80 pA: LIII vs. LX      | <b>&lt;0.0001</b> | (t) 4.810 (df) 1694 | 7.95 ± 1.0 mV vs. 11.13 ± 1.0 mV  | 26 vs. 27 cells |
|            | 40 pA: LIII vs. LX      | <b>&lt;0.0001</b> | (t) 6.316 (df) 1694 | 3.82 ± 1.1 mV vs. 7.99 ± 1.2 mV   | 26 vs. 27 cells |
|            | 0 pA: LIII vs. LX       | <b>0.0405</b>     | (t) 2.050 (df) 1694 | 0.03 ± 0.4 mV vs. 1.39 ± 0.7 mV   | 26 vs. 27 cells |
|            | 0 pA: LIII vs. LX       | 0.6118            | (t) 0.508 (df) 1694 | 0.05 ± 0.1 mV vs. -0.29 ± 0.2 mV  | 26 vs. 27 cells |
|            | 0 pA: LIII vs. LX       | 0.6395            | (t) 0.469 (df) 1694 | 0.11 ± 0.1 mV vs. -0.20 ± 0.1 mV  | 26 vs. 27 cells |
|            | 0 pA: LIII vs. LX       | 0.7359            | (t) 0.337 (df) 1694 | 0.04 ± 0.0 mV vs. -0.18 ± 0.0 mV  | 26 vs. 27 cells |
|            | 0 pA: LIII vs. LX       | 0.6687            | (t) 0.428 (df) 1694 | 0.06 ± 0.0 mV vs. -0.11 ± 0.0 mV  | 26 vs. 27 cells |
|            | 0 pA: LIII vs. LX       | 0.7170            | (t) 0.363 (df) 1694 | 0.05 ± 0.0 mV vs. -0.07 ± 0.0 mV  | 26 vs. 27 cells |
|            | 0 pA: LIII vs. LX       | 0.7840            | (t) 0.247 (df) 1694 | 0.03 ± 0.0 mV vs. -0.03 ± 0.0 mV  | 26 vs. 27 cells |
|            | 0 pA: LIII vs. LX       | 0.8254            | (t) 0.221 (df) 1694 | 0.04 ± 0.0 mV vs. 0.01 ± 0.0 mV   | 26 vs. 27 cells |
|            | 0 pA: LIII vs. LX       | 0.7569            | (t) 0.310 (df) 1694 | 0.04 ± 0.0 mV vs. -0.05 ± 0.1 mV  | 26 vs. 27 cells |
| Figure 3D2 | 0 pA: LIII↓ vs. LIII↑   | 0.9151            | (t) 0.107 (df) 416  | 0.00 ± 0.0 mV vs. 0.04 ± 0.0 mV   |                 |
|            | 0 pA: LIII↓ vs. LIII↑   | 0.8991            | (t) 0.127 (df) 416  | -0.10 ± 0.0 mV vs. 0.04 ± 0.0 mV  |                 |
|            | 0 pA: LIII↓ vs. LIII↑   | 0.9263            | (t) 0.093 (df) 416  | 0.00 ± 0.0 mV vs. 0.03 ± 0.0 mV   |                 |
|            | 0 pA: LIII↓ vs. LIII↑   | 0.9033            | (t) 0.122 (df) 416  | 0.01 ± 0.0 mV vs. 0.05 ± 0.0 mV   |                 |
|            | 0 pA: LIII↓ vs. LIII↑   | 0.8708            | (t) 0.163 (df) 416  | 0.01 ± 0.0 mV vs. 0.06 ± 0.0 mV   |                 |
|            | 0 pA: LIII↓ vs. LIII↑   | 0.9752            | (t) 0.031 (df) 416  | 0.03 ± 0.0 mV vs. 0.04 ± 0.0 mV   |                 |
|            | 0 pA: LIII↓ vs. LIII↑   | 0.8540            | (t) 0.184 (df) 416  | 0.03 ± 0.0 mV vs. 0.11 ± 0.1 mV   |                 |
|            | 0 pA: LIII↓ vs. LIII↑   | 0.9793            | (t) 0.026 (df) 416  | 0.04 ± 0.0 mV vs. 0.05 ± 0.1 mV   | 26 cells        |
|            | 0 pA: LIII↓ vs. LIII↑   | 0.9917            | (t) 0.010 (df) 416  | 0.04 ± 0.0 mV vs. 0.03 ± 0.4 mV   |                 |
|            | 40 pA: LIII↓ vs. LIII↑  | <b>&lt;0.0001</b> | (t) 7.420 (df) 416  | 0.52 ± 0.1 mV vs. 3.82 ± 1.1 mV   |                 |
|            | 80 pA: LIII↓ vs. LIII↑  | <b>&lt;0.0001</b> | (t) 9.265 (df) 416  | 3.83 ± 0.1 mV vs. 7.95 ± 1.0 mV   |                 |
|            | 120 pA: LIII↓ vs. LIII↑ | <b>&lt;0.0001</b> | (t) 8.126 (df) 416  | 7.82 ± 0.6 mV vs. 11.43 ± 0.9 mV  |                 |
|            | 160 pA: LIII↓ vs. LIII↑ | <b>0.0001</b>     | (t) 3.918 (df) 416  | 11.50 ± 0.6 mV vs. 13.24 ± 0.7 mV |                 |
|            | 200 pA: LIII↓ vs. LIII↑ | 0.1301            | (t) 1.517 (df) 416  | 14.33 ± 0.6 mV vs. 15.01 ± 0.5 mV |                 |
|            | 240 pA: LIII↓ vs. LIII↑ | 0.3025            | (t) 1.032 (df) 416  | 15.74 ± 0.5 mV vs. 16.20 ± 0.5 mV |                 |

|            |                        |                         |                   |                                       |                                   |                 |
|------------|------------------------|-------------------------|-------------------|---------------------------------------|-----------------------------------|-----------------|
| Figure 3D3 | Mixed-effects analysis | 280 pA: LIII↓ vs. LIII↑ | 0.5926            | ( <i>t</i> ) 0.535 ( <i>df</i> ) 416  | 16.40 ± 0.5 mV vs. 16.64 ± 0.6 mV | 27 cells        |
|            |                        | 320 pA                  |                   |                                       | 16.34 ± 0.6 mV                    |                 |
|            |                        | 0 pA: LX↓ vs. LX↑       | 0.8721            | ( <i>t</i> ) 0.161 ( <i>df</i> ) 415  | 0.02 ± 0.0 mV vs. -0.05 ± 0.1 mV  |                 |
|            |                        | 0 pA: LX↓ vs. LX↑       | 0.9535            | ( <i>t</i> ) 0.058 ( <i>df</i> ) 415  | 0.02 ± 0.0 mV vs. 0.01 ± 0.0 mV   |                 |
|            |                        | 0 pA: LX↓ vs. LX↑       | 0.8999            | ( <i>t</i> ) 0.126 ( <i>df</i> ) 415  | 0.02 ± 0.0 mV vs. -0.03 ± 0.0 mV  |                 |
|            |                        | 0 pA: LX↓ vs. LX↑       | 0.8054            | ( <i>t</i> ) 0.247 ( <i>df</i> ) 415  | 0.05 ± 0.0 mV vs. -0.07 ± 0.0 mV  |                 |
|            |                        | 0 pA: LX↓ vs. LX↑       | 0.6601            | ( <i>t</i> ) 0.440 ( <i>df</i> ) 415  | 0.07 ± 0.0 mV vs. -0.11 ± 0.0 mV  |                 |
|            |                        | 0 pA: LX↓ vs. LX↑       | 0.5917            | ( <i>t</i> ) 0.537 ( <i>df</i> ) 415  | 0.10 ± 0.0 mV vs. -0.18 ± 0.0 mV  |                 |
|            |                        | 0 pA: LX↓ vs. LX↑       | 0.5366            | ( <i>t</i> ) 0.619 ( <i>df</i> ) 415  | 0.13 ± 0.0 mV vs. -0.20 ± 0.1 mV  |                 |
|            |                        | 0 pA: LX↓ vs. LX↑       | 0.4664            | ( <i>t</i> ) 0.729 ( <i>df</i> ) 415  | 0.10 ± 0.0 mV vs. -0.29 ± 0.2 mV  |                 |
|            |                        | 0 pA: LX↓ vs. LX↑       | <b>0.0180</b>     | ( <i>t</i> ) 2.375 ( <i>df</i> ) 415  | 0.14 ± 0.0 mV vs. 1.39 ± 0.7 mV   |                 |
|            |                        | 40 pA: LX↓ vs. LX↑      | <b>&lt;0.0001</b> | ( <i>t</i> ) 13.470 ( <i>df</i> ) 415 | 0.76 ± 0.2 mV vs. 7.99 ± 1.2 mV   |                 |
|            |                        | 80 pA: LX↓ vs. LX↑      | <b>&lt;0.0001</b> | ( <i>t</i> ) 11.300 ( <i>df</i> ) 415 | 5.18 ± 0.3 mV vs. 11.13 ± 1.0 mV  |                 |
|            |                        | 120 pA: LX↓ vs. LX↑     | <b>&lt;0.0001</b> | ( <i>t</i> ) 7.226 ( <i>df</i> ) 415  | 9.23 ± 0.5 mV vs. 13.03 ± 0.8 mV  |                 |
|            |                        | 160 pA: LX↓ vs. LX↑     | <b>0.0045</b>     | ( <i>t</i> ) 2.860 ( <i>df</i> ) 415  | 13.06 ± 0.5 mV vs. 14.57 ± 0.7 mV |                 |
|            |                        | 200 pA: LX↓ vs. LX↑     | 0.4821            | ( <i>t</i> ) 0.704 ( <i>df</i> ) 415  | 14.91 ± 0.5 mV vs. 15.28 ± 0.7 mV |                 |
|            |                        | 240 pA: LX↓ vs. LX↑     | 0.6829            | ( <i>t</i> ) 0.409 ( <i>df</i> ) 415  | 16.30 ± 0.7 mV vs. 16.09 ± 0.7 mV |                 |
|            |                        | 280 pA: LX↓ vs. LX↑     | 0.9961            | ( <i>t</i> ) 0.005 ( <i>df</i> ) 415  | 16.46 ± 0.7 mV vs. 16.46 ± 0.7 mV |                 |
|            |                        | 320 pA                  |                   |                                       | 15.66 ± 0.9 mV vs. 15.66 ± 0.9 mV |                 |
| Figure 3E1 | Mixed-effects analysis | 0 pA: LIII vs. LX       |                   |                                       | 0.00 ± 0.0 Hz vs. 0.00 ± 0.0 Hz   | 26 vs. 27 cells |
|            |                        | 0 pA: LIII vs. LX       |                   |                                       | 0.00 ± 0.0 Hz vs. 0.00 ± 0.0 Hz   | 26 vs. 27 cells |
|            |                        | 0 pA: LIII vs. LX       |                   |                                       | 0.00 ± 0.0 Hz vs. 0.00 ± 0.0 Hz   | 26 vs. 27 cells |
|            |                        | 0 pA: LIII vs. LX       |                   |                                       | 0.00 ± 0.0 Hz vs. 0.00 ± 0.0 Hz   | 26 vs. 27 cells |
|            |                        | 0 pA: LIII vs. LX       |                   |                                       | 0.00 ± 0.0 Hz vs. 0.00 ± 0.0 Hz   | 26 vs. 27 cells |
|            |                        | 0 pA: LIII vs. LX       |                   |                                       | 0.00 ± 0.0 Hz vs. 0.00 ± 0.0 Hz   | 26 vs. 27 cells |
|            |                        | 0 pA: LIII vs. LX       |                   |                                       | 0.00 ± 0.0 Hz vs. 0.00 ± 0.0 Hz   | 26 vs. 27 cells |
|            |                        | 0 pA: LIII vs. LX       |                   |                                       | 0.00 ± 0.0 Hz vs. 0.00 ± 0.0 Hz   | 26 vs. 27 cells |
|            |                        | 0 pA: LIII vs. LX       |                   |                                       | 0.00 ± 0.0 Hz vs. 0.00 ± 0.0 Hz   | 26 vs. 27 cells |
|            |                        | 0 pA: LIII vs. LX       |                   |                                       | 0.00 ± 0.0 Hz vs. 0.00 ± 0.0 Hz   | 26 vs. 27 cells |
|            |                        | 40 pA: LIII vs. LX      |                   |                                       | 0.00 ± 0.0 Hz vs. 0.00 ± 0.0 Hz   | 26 vs. 27 cells |
|            |                        | 80 pA: LIII vs. LX      | 0.8280            | ( <i>t</i> ) 0.217 ( <i>df</i> ) 1694 | 0.73 ± 0.0 Hz vs. 1.78 ± 1.0 Hz   | 26 vs. 27 cells |
|            |                        | 120 pA: LIII vs. LX     | 0.6231            | ( <i>t</i> ) 0.492 ( <i>df</i> ) 1694 | 13.10 ± 4.4 Hz vs. 10.73 ± 2.7 Hz | 26 vs. 27 cells |
|            |                        | 160 pA: LIII vs. LX     | 0.5397            | ( <i>t</i> ) 0.613 ( <i>df</i> ) 1694 | 29.79 ± 6.6 Hz vs. 26.83 ± 3.7 Hz | 26 vs. 27 cells |
|            |                        | 200 pA: LIII vs. LX     | 0.1272            | ( <i>t</i> ) 1.526 ( <i>df</i> ) 1694 | 47.75 ± 7.3 Hz vs. 40.40 ± 4.3 Hz | 26 vs. 27 cells |
|            |                        | 240 pA: LIII vs. LX     | <b>0.0156</b>     | ( <i>t</i> ) 2.421 ( <i>df</i> ) 1694 | 63.79 ± 7.8 Hz vs. 52.13 ± 4.2 Hz | 26 vs. 27 cells |
|            |                        | 280 pA: LIII vs. LX     | <b>0.0009</b>     | ( <i>t</i> ) 3.331 ( <i>df</i> ) 1694 | 77.81 ± 8.3 Hz vs. 61.76 ± 4.4 Hz | 26 vs. 27 cells |
|            |                        | 320 pA: LIII vs. LX     | <b>&lt;0.0001</b> | ( <i>t</i> ) 4.350 ( <i>df</i> ) 1694 | 88.65 ± 8.6 Hz vs. 67.69 ± 4.7 Hz | 26 vs. 27 cells |
|            |                        | 280 pA: LIII vs. LX     | <b>0.0004</b>     | ( <i>t</i> ) 3.543 ( <i>df</i> ) 1694 | 77.99 ± 8.3 Hz vs. 60.92 ± 4.4 Hz | 26 vs. 27 cells |
|            |                        | 240 pA: LIII vs. LX     | <b>0.0181</b>     | ( <i>t</i> ) 2.366 ( <i>df</i> ) 1694 | 64.00 ± 8.1 Hz vs. 52.60 ± 4.2 Hz | 26 vs. 27 cells |
|            |                        | 200 pA: LIII vs. LX     | 0.2112            | ( <i>t</i> ) 1.251 ( <i>df</i> ) 1694 | 49.95 ± 7.4 Hz vs. 43.92 ± 3.9 Hz | 26 vs. 27 cells |
|            |                        | 160 pA: LIII vs. LX     | 0.6611            | ( <i>t</i> ) 0.138 ( <i>df</i> ) 1694 | 36.57 ± 6.7 Hz vs. 34.46 ± 3.6 Hz | 26 vs. 27 cells |
|            |                        | 120 pA: LIII vs. LX     | 0.7107            | ( <i>t</i> ) 0.371 ( <i>df</i> ) 1694 | 23.42 ± 5.5 Hz vs. 25.21 ± 3.2 Hz | 26 vs. 27 cells |
|            |                        | 80 pA: LIII vs. LX      | 0.6104            | ( <i>t</i> ) 0.510 ( <i>df</i> ) 1694 | 12.71 ± 4.0 Hz vs. 15.17 ± 2.4 Hz | 26 vs. 27 cells |
|            |                        | 40 pA: LIII vs. LX      | 0.8125            | ( <i>t</i> ) 0.237 ( <i>df</i> ) 1694 | 4.20 ± 1.8 Hz vs. 5.35 ± 1.2 Hz   | 26 vs. 27 cells |
|            |                        | 0 pA: LIII vs. LX       | 0.9964            | ( <i>t</i> ) 0.004 ( <i>df</i> ) 1694 | 0.48 ± 0.4 Hz vs. 0.50 ± 0.2 Hz   | 26 vs. 27 cells |
|            |                        | 0 pA: LIII vs. LX       | 0.9769            | ( <i>t</i> ) 0.029 ( <i>df</i> ) 1694 | 0.21 ± 0.2 Hz vs. 0.07 ± 0.0 Hz   | 26 vs. 27 cells |
|            |                        | 0 pA: LIII vs. LX       | 0.9924            | ( <i>t</i> ) 0.009 ( <i>df</i> ) 1694 | 0.06 ± 0.1 Hz vs. 0.02 ± 0.0 Hz   | 26 vs. 27 cells |
|            |                        | 0 pA: LIII vs. LX       |                   |                                       | 0.00 ± 0.0 Hz vs. 0.00 ± 0.0 Hz   | 26 vs. 27 cells |
|            |                        | 0 pA: LIII vs. LX       |                   |                                       | 0.00 ± 0.0 Hz vs. 0.00 ± 0.0 Hz   | 26 vs. 27 cells |
|            |                        | 0 pA: LIII vs. LX       |                   |                                       | 0.00 ± 0.0 Hz vs. 0.00 ± 0.0 Hz   | 26 vs. 27 cells |
|            |                        | 0 pA: LIII vs. LX       |                   |                                       | 0.00 ± 0.0 Hz vs. 0.00 ± 0.0 Hz   | 26 vs. 27 cells |
|            |                        | 0 pA: LIII vs. LX       |                   |                                       | 0.00 ± 0.0 Hz vs. 0.00 ± 0.0 Hz   | 26 vs. 27 cells |
|            |                        | 0 pA: LIII vs. LX       |                   |                                       | 0.00 ± 0.0 Hz vs. 0.00 ± 0.0 Hz   | 26 vs. 27 cells |
| Figure 3E2 | Mixed-effects analysis | 0 pA: LIII↓ vs. LIII↑   |                   |                                       | 0.00 ± 0.0 Hz vs. 0.00 ± 0.0 Hz   | 26 cells        |
|            |                        | 0 pA: LIII↓ vs. LIII↑   |                   |                                       | 0.00 ± 0.0 Hz vs. 0.00 ± 0.0 Hz   |                 |
|            |                        | 0 pA: LIII↓ vs. LIII↑   |                   |                                       | 0.00 ± 0.0 Hz vs. 0.00 ± 0.0 Hz   |                 |
|            |                        | 0 pA: LIII↓ vs. LIII↑   |                   |                                       | 0.00 ± 0.0 Hz vs. 0.00 ± 0.0 Hz   |                 |
|            |                        | 0 pA: LIII↓ vs. LIII↑   |                   |                                       | 0.00 ± 0.0 Hz vs. 0.00 ± 0.0 Hz   |                 |
|            |                        | 0 pA: LIII↓ vs. LIII↑   |                   |                                       | 0.00 ± 0.0 Hz vs. 0.00 ± 0.0 Hz   |                 |
|            |                        | 0 pA: LIII↓ vs. LIII↑   | 0.9879            | ( <i>t</i> ) 0.015 ( <i>df</i> ) 416  | 0.00 ± 0.0 Hz vs. 0.06 ± 0.1 Hz   |                 |
|            |                        | 0 pA: LIII↓ vs. LIII↑   | 0.9610            | ( <i>t</i> ) 0.049 ( <i>df</i> ) 416  | 0.00 ± 0.0 Hz vs. 0.21 ± 0.2 Hz   |                 |
|            |                        | 0 pA: LIII↓ vs. LIII↑   | 0.9098            | ( <i>t</i> ) 0.113 ( <i>df</i> ) 416  | 0.00 ± 0.0 Hz vs. 0.48 ± 0.4 Hz   |                 |
|            |                        | 40 pA: LIII↓ vs. LIII↑  | 0.3224            | ( <i>t</i> ) 0.991 ( <i>df</i> ) 416  | 0.00 ± 0.0 Hz vs. 4.2 ± 1.8 Hz    |                 |
|            |                        | 80 pA: LIII↓ vs. LIII↑  | <b>0.0050</b>     | ( <i>t</i> ) 2.824 ( <i>df</i> ) 416  | 0.73 ± 0.3 Hz vs. 12.71 ± 4.0 Hz  |                 |



|            |                        |                         |                          |                                      |                                   |          |
|------------|------------------------|-------------------------|--------------------------|--------------------------------------|-----------------------------------|----------|
|            |                        | 120 pA: LIII↓ vs. LIII↑ | <u><b>0.0154</b></u>     | ( <i>t</i> ) 2.432 ( <i>df</i> ) 416 | 13.10 ± 4.4 Hz vs. 23.42 ± 5.5 Hz |          |
|            |                        | 160 pA: LIII↓ vs. LIII↑ | 0.1106                   | ( <i>t</i> ) 1.599 ( <i>df</i> ) 416 | 29.79 ± 6.6 Hz vs. 36.57 ± 6.7 Hz |          |
|            |                        | 200 pA: LIII↓ vs. LIII↑ | 0.6045                   | ( <i>t</i> ) 0.518 ( <i>df</i> ) 416 | 47.75 ± 7.3 Hz vs. 49.95 ± 7.4 Hz |          |
|            |                        | 240 pA: LIII↓ vs. LIII↑ | 0.96410                  | ( <i>t</i> ) 0.049 ( <i>df</i> ) 416 | 63.79 ± 7.8 Hz vs. 64 ± 8.1 Hz    |          |
|            |                        | 280 pA: LIII↓ vs. LIII↑ | 0.9667                   | ( <i>t</i> ) 0.042 ( <i>df</i> ) 416 | 77.81 ± 8.3 Hz vs. 77.99 ± 8.3 Hz |          |
|            |                        | 320 pA                  |                          |                                      | 88.65 ± 8.6 Hz                    |          |
| Figure 3E3 | Mixed-effects analysis | 0 pA: LX↓ vs. LX↑       |                          |                                      | 0.00 ± 0.0 Hz vs. 0.00 ± 0.0 Hz   | 27 cells |
|            |                        | 0 pA: LX↓ vs. LX↑       |                          |                                      | 0.00 ± 0.0 Hz vs. 0.00 ± 0.0 Hz   |          |
|            |                        | 0 pA: LX↓ vs. LX↑       |                          |                                      | 0.00 ± 0.0 Hz vs. 0.00 ± 0.0 Hz   |          |
|            |                        | 0 pA: LX↓ vs. LX↑       |                          |                                      | 0.00 ± 0.0 Hz vs. 0.00 ± 0.0 Hz   |          |
|            |                        | 0 pA: LX↓ vs. LX↑       |                          |                                      | 0.00 ± 0.0 Hz vs. 0.00 ± 0.0 Hz   |          |
|            |                        | 0 pA: LX↓ vs. LX↑       |                          |                                      | 0.00 ± 0.0 Hz vs. 0.00 ± 0.0 Hz   |          |
|            |                        | 0 pA: LX↓ vs. LX↑       | 0.9902                   | ( <i>t</i> ) 0.012 ( <i>df</i> ) 415 | 0.00 ± 0.0 Hz vs. 0.02 ± 0.0 Hz   |          |
|            |                        | 0 pA: LX↓ vs. LX↑       | 0.9641                   | ( <i>t</i> ) 0.045 ( <i>df</i> ) 415 | 0.00 ± 0.0 Hz vs. 0.07 ± 0.0 Hz   |          |
|            |                        | 0 pA: LX↓ vs. LX↑       | 0.7389                   | ( <i>t</i> ) 0.334 ( <i>df</i> ) 415 | 0.00 ± 0.0 Hz vs. 0.50 ± 0.2 Hz   |          |
|            |                        | 40 pA: LX↓ vs. LX↑      | <u><b>0.0004</b></u>     | ( <i>t</i> ) 3.550 ( <i>df</i> ) 415 | 0.00 ± 0.0 Hz vs. 5.35 ± 1.2 Hz   |          |
|            |                        | 80 pA: LX↓ vs. LX↑      | <u><b>&lt;0.0001</b></u> | ( <i>t</i> ) 8.892 ( <i>df</i> ) 415 | 1.78 ± 1.0 Hz vs. 15.17 ± 2.4 Hz  |          |
|            |                        | 120 pA: LX↓ vs. LX↑     | <u><b>&lt;0.0001</b></u> | ( <i>t</i> ) 9.613 ( <i>df</i> ) 415 | 10.73 ± 2.7 Hz vs. 25.21 ± 3.2 Hz |          |
|            |                        | 160 pA: LX↓ vs. LX↑     | <u><b>&lt;0.0001</b></u> | ( <i>t</i> ) 5.064 ( <i>df</i> ) 415 | 26.83 ± 3.7 Hz vs. 34.46 ± 3.6 Hz |          |
|            |                        | 200 pA: LX↓ vs. LX↑     | <u><b>0.0198</b></u>     | ( <i>t</i> ) 2.340 ( <i>df</i> ) 415 | 40.40 ± 4.3 Hz vs. 43.92 ± 3.9 Hz |          |
|            |                        | 240 pA: LX↓ vs. LX↑     | 0.7551                   | ( <i>t</i> ) 0.312 ( <i>df</i> ) 415 | 52.13 ± 4.2 Hz vs. 52.60 ± 4.2 Hz |          |
|            |                        | 280 pA: LX↓ vs. LX↑     | 0.5762                   | ( <i>t</i> ) 0.559 ( <i>df</i> ) 415 | 61.76 ± 4.4 Hz vs. 60.92 ± 4.4 Hz |          |
|            |                        | 320 pA                  |                          |                                      | 67.69 ± 4.7 Hz vs. 67.69 ± 4.7 Hz |          |

**Table S4.** Statistical data for in vitro whole cell patch electrophysiology in the juvenile mouse (P3-24), for action potential analysis. Descriptive values are represented as  $\pm$  SEM. Abbreviations: LIII = Lobule III, LX = Lobule X, *df* = degrees of freedom, pA = picoampere,  $\Omega$  = ohm, mV = millivolt, Vm = membrane voltage, msec = millisecond.

| Related Figure | Test Applied                        | Group                   | <i>p</i> -Value   | Population-Value                    | Descriptive Values                                       | Population Size |
|----------------|-------------------------------------|-------------------------|-------------------|-------------------------------------|----------------------------------------------------------|-----------------|
| Figure 4B      | One-way ANOVA                       | P3-5: LIII vs. LX       | 0.5629            | ( <i>t</i> ) 0.582 ( <i>df</i> ) 51 | -21.89 $\pm$ 5.2 Vm vs. -25.91 $\pm$ 3.4 Vm              | 3 vs. 18 cells  |
|                |                                     | P15-17: LIII vs LX      | 0.7420            | ( <i>t</i> ) 0.331 ( <i>df</i> ) 51 | -38.35 $\pm$ 3.1 Vm vs. -36.76 $\pm$ 2.1 Vm              | 9 vs. 13 cells  |
|                |                                     | P22-24: LIII vs LX      | 0.8364            | ( <i>t</i> ) 0.208 ( <i>df</i> ) 51 | -38.51 $\pm$ 5.4 Vm vs. -39.79 $\pm$ 2.8 Vm              | 5 vs. 9 cells   |
|                |                                     | LIII: P3-5 vs. P15-17   | <b>0.0303</b>     | ( <i>t</i> ) 2.228 ( <i>df</i> ) 51 | -21.89 $\pm$ 5.2 Vm vs. -38.35 $\pm$ 3.1 Vm              | 3 vs. 9 cells   |
|                |                                     | LIII: P3-5 vs. P22-24   | <b>0.0451</b>     | ( <i>t</i> ) 2.054 ( <i>df</i> ) 51 | -21.89 $\pm$ 5.2 Vm vs. -38.51 $\pm$ 5.4 Vm              | 3 vs. 5 cells   |
|                |                                     | LIII: P15-17 vs. P22-24 | 0.7830            | ( <i>t</i> ) 0.026 ( <i>df</i> ) 51 | -38.35 $\pm$ 3.1 Vm vs. -38.51 $\pm$ 5.4 Vm              | 9 vs. 5 cells   |
|                |                                     | LX: P3-5 vs. P15-17     | <b>0.0097</b>     | ( <i>t</i> ) 2.095 ( <i>df</i> ) 51 | -25.91 $\pm$ 3.4 Vm vs. -36.76 $\pm$ 2.1 Vm              | 18 vs. 13 cells |
|                |                                     | LX: P3-5 vs. P22-24     | <b>0.0034</b>     | ( <i>t</i> ) 3.068 ( <i>df</i> ) 51 | -25.91 $\pm$ 3.4 Vm vs. -39.79 $\pm$ 2.8 Vm              | 18 vs. 9 cells  |
| Figure 4C      | One-way ANOVA                       | LX: P15-17 vs. P22-24   | 0.5302            | ( <i>t</i> ) 0.632 ( <i>df</i> ) 51 | -36.76 $\pm$ 2.1 Vm vs. -39.79 $\pm$ 2.8 Vm              | 13 vs. 9 cells  |
|                |                                     | P3-5: LIII vs. LX       | 0.4313            | ( <i>t</i> ) 0.793 ( <i>df</i> ) 51 | 61.24 $\pm$ 5.8 mV vs. 66.77 $\pm$ 2.2 mV                | 3 vs. 18 cells  |
|                |                                     | P15-17: LIII vs LX      | 0.8533            | ( <i>t</i> ) 0.186 ( <i>df</i> ) 51 | 89.09 $\pm$ 4.7 mV vs. 89.99 $\pm$ 3.6 mV                | 9 vs. 13 cells  |
|                |                                     | P22-24: LIII vs LX      | 0.2000            | ( <i>t</i> ) 1.298 ( <i>df</i> ) 51 | 89.30 $\pm$ 6.4 mV vs. 97.39 $\pm$ 2.3 mV                | 5 vs. 9 cells   |
|                |                                     | LIII: P3-5 vs. P15-17   | <b>0.0005</b>     | ( <i>t</i> ) 3.740 ( <i>df</i> ) 51 | 61.24 $\pm$ 5.8 mV vs. 89.09 $\pm$ 4.7 mV                | 3 vs. 9 cells   |
|                |                                     | LIII: P3-5 vs. P22-24   | <b>0.0012</b>     | ( <i>t</i> ) 3.439 ( <i>df</i> ) 51 | 61.24 $\pm$ 5.8 mV vs. 89.30 $\pm$ 6.4 mV                | 3 vs. 5 cells   |
|                |                                     | LIII: P15-17 vs. P22-24 | 0.9735            | ( <i>t</i> ) 0.033 ( <i>df</i> ) 51 | 89.09 $\pm$ 4.7 mV vs. 89.30 $\pm$ 6.4 mV                | 9 vs. 5 cells   |
|                |                                     | LX: P3-5 vs. P15-17     | <b>&lt;0.0001</b> | ( <i>t</i> ) 5.712 ( <i>df</i> ) 51 | 66.77 $\pm$ 2.2 mV vs. 89.99 $\pm$ 3.6 mV                | 18 vs. 13 cells |
| Figure 4D1     | Kruskal–Wallis test                 | LX: P3-5 vs. P22-24     | <b>&lt;0.0001</b> | ( <i>t</i> ) 3.990 ( <i>df</i> ) 51 | 66.77 $\pm$ 2.2 mV vs. 97.39 $\pm$ 2.3 mV                | 18 vs. 9 cells  |
|                |                                     | LX: P15-17 vs. P22-24   | 0.1329            | ( <i>t</i> ) 1.527 ( <i>df</i> ) 51 | 89.99 $\pm$ 3.6 mV vs. 97.39 $\pm$ 2.3 mV                | 13 vs. 9 cells  |
|                |                                     | P3-5: LIII vs. LX       | 0.9698            | ( <i>Z</i> ) 0.038                  | 0.89 $\pm$ 0.17 msec vs. 0.85 $\pm$ 0.06 msec            | 3 vs. 18 cells  |
|                |                                     | P15-17: LIII vs LX      | 0.2963            | ( <i>Z</i> ) 1.044                  | 0.15 $\pm$ 0.01 msec vs. 0.18 $\pm$ 0.01 msec            | 9 vs. 13 cells  |
|                |                                     | P22-24: LIII vs LX      | 0.0705            | ( <i>Z</i> ) 1.809                  | 0.15 $\pm$ 0.01 msec vs. 0.22 $\pm$ 0.02 msec            | 5 vs. 9 cells   |
|                |                                     | LIII: P3-5 vs. P15-17   | <b>0.0013</b>     | ( <i>Z</i> ) 3.217                  | 0.89 $\pm$ 0.17 msec vs. 0.15 $\pm$ 0.01 msec            | 3 vs. 9 cells   |
|                |                                     | LIII: P3-5 vs. P22-24   | <b>0.0026</b>     | ( <i>Z</i> ) 3.012                  | 0.89 $\pm$ 0.17 msec vs. 0.15 $\pm$ 0.01 msec            | 3 vs. 5 cells   |
|                |                                     | LIII: P15-17 vs. P22-24 | 0.9220            | ( <i>Z</i> ) 0.098                  | 0.15 $\pm$ 0.01 msec vs. 0.15 $\pm$ 0.01 msec            | 9 vs. 5 cells   |
| Figure 4D2     | Kruskal–Wallis test                 | LX: P3-5 vs. P15-17     | <b>&lt;0.0001</b> | ( <i>Z</i> ) 4.583                  | 0.85 $\pm$ 0.06 msec vs. 0.18 $\pm$ 0.01 msec            | 18 vs. 13 cells |
|                |                                     | LX: P3-5 vs. P22-24     | <b>0.0043</b>     | ( <i>Z</i> ) 2.858                  | 0.85 $\pm$ 0.06 msec vs. 0.22 $\pm$ 0.02 msec            | 18 vs. 9 cells  |
|                |                                     | LX: P15-17 vs. P22-24   | 0.2475            | ( <i>Z</i> ) 1.156                  | 0.18 $\pm$ 0.01 msec vs. 0.22 $\pm$ 0.02 msec            | 13 vs. 9 cells  |
|                |                                     | P3-5: LIII vs. LX       | 0.9436            | ( <i>Z</i> ) 0.071                  | 0.69 $\pm$ 0.16 msec vs. 0.65 $\pm$ 0.07 msec            | 3 vs. 18 cells  |
|                |                                     | P15-17: LIII vs LX      | 0.9530            | ( <i>Z</i> ) 0.059                  | 0.16 $\pm$ 0.02 msec vs. 0.16 $\pm$ 0.02 msec            | 9 vs. 13 cells  |
|                |                                     | P22-24: LIII vs LX      | 0.1674            | ( <i>Z</i> ) 1.381                  | 0.12 $\pm$ 0.00 msec vs. 0.15 $\pm$ 0.01 msec            | 5 vs. 9 cells   |
|                |                                     | LIII: P3-5 vs. P15-17   | <b>0.0125</b>     | ( <i>Z</i> ) 2.499                  | 0.69 $\pm$ 0.16 msec vs. 0.16 $\pm$ 0.02 msec            | 3 vs. 9 cells   |
|                |                                     | LIII: P3-5 vs. P22-24   | <b>0.0012</b>     | ( <i>Z</i> ) 3.233                  | 0.69 $\pm$ 0.16 msec vs. 0.12 $\pm$ 0.00 msec            | 3 vs. 5 cells   |
| Figure 4D3     | Brown-Forsythe and Welch ANOVA test | LIII: P15-17 vs. P22-24 | 0.2124            | ( <i>Z</i> ) 1.247                  | 0.16 $\pm$ 0.02 msec vs. 0.12 $\pm$ 0.00 msec            | 9 vs. 5 cells   |
|                |                                     | LX: P3-5 vs. P15-17     | <b>&lt;0.0001</b> | ( <i>Z</i> ) 4.385                  | 0.65 $\pm$ 0.07 msec vs. 0.16 $\pm$ 0.02 msec            | 18 vs. 13 cells |
|                |                                     | LX: P3-5 vs. P22-24     | <b>0.0002</b>     | ( <i>Z</i> ) 3.790                  | 0.65 $\pm$ 0.07 msec vs. 0.15 $\pm$ 0.01 msec            | 18 vs. 9 cells  |
|                |                                     | LX: P15-17 vs. P22-24   | 0.9099            | ( <i>Z</i> ) 0.113                  | 0.16 $\pm$ 0.02 msec vs. 0.15 $\pm$ 0.01 msec            | 13 vs. 9 cells  |
|                |                                     | P3-5: LIII vs. LX       | 0.6002            | ( <i>t</i> ) 0.575( <i>df</i> ) 4   | 0.64 $\pm$ 0.12 msec vs. 0.72 $\pm$ 0.07 msec            | 3 vs. 18 cells  |
|                |                                     | P15-17: LIII vs LX      | <b>0.0081</b>     | ( <i>t</i> ) 3.006 ( <i>df</i> ) 17 | 0.14 $\pm$ 0.00 msec vs. 0.17 $\pm$ 0.01 msec            | 9 vs. 13 cells  |
|                |                                     | P22-24: LIII vs LX      | <b>&lt;0.0001</b> | ( <i>t</i> ) 6.076 ( <i>df</i> ) 12 | 0.13 $\pm$ 0.01 msec vs. 0.24 $\pm$ 0.02 msec            | 5 vs. 9 cells   |
|                |                                     | LIII: P3-5 vs. P15-17   | 0.0547            | ( <i>t</i> ) 4.089 ( <i>df</i> ) 2  | 0.64 $\pm$ 0.12 msec vs. 0.14 $\pm$ 0.00 msec            | 3 vs. 9 cells   |
| Figure 4E      | Kruskal–Wallis test                 | LIII: P3-5 vs. P22-24   | 0.0516            | ( <i>t</i> ) 4.175 ( <i>df</i> ) 2  | 0.64 $\pm$ 0.12 msec vs. 0.13 $\pm$ 0.01 msec            | 3 vs. 5 cells   |
|                |                                     | LIII: P15-17 vs. P22-24 | 0.3282            | ( <i>t</i> ) 1.068 ( <i>df</i> ) 6  | 0.14 $\pm$ 0.00 msec vs. 0.13 $\pm$ 0.01 msec            | 9 vs. 5 cells   |
|                |                                     | LX: P3-5 vs. P15-17     | <b>&lt;0.0001</b> | ( <i>t</i> ) 7.680 ( <i>df</i> ) 18 | 0.72 $\pm$ 0.07 msec vs. 0.17 $\pm$ 0.01 msec            | 18 vs. 13 cells |
|                |                                     | LX: P3-5 vs. P22-24     | <b>&lt;0.0001</b> | ( <i>t</i> ) 6.626 ( <i>df</i> ) 19 | 0.72 $\pm$ 0.07 msec vs. 0.24 $\pm$ 0.02 msec            | 18 vs. 9 cells  |
|                |                                     | LX: P15-17 vs. P22-24   | <b>0.0026</b>     | ( <i>t</i> ) 3.635 ( <i>df</i> ) 14 | 0.17 $\pm$ 0.01 msec vs. 0.24 $\pm$ 0.02 msec            | 13 vs. 9 cells  |
|                |                                     | P3-5: LIII vs. LX       | >0.9999           | ( <i>Z</i> ) 0.000                  | 0.00 $\pm$ 0.00 mV vs. 0.00 $\pm$ 0.00 mV                | 3 vs. 18 cells  |
|                |                                     | P15-17: LIII vs LX      | 0.3885            | ( <i>Z</i> ) 0.862                  | 8.24 $\pm$ 0.94 mV vs. 6.55 $\pm$ 1.02 mV                | 9 vs. 13 cells  |
|                |                                     | P22-24: LIII vs LX      | 0.6090            | ( <i>Z</i> ) 0.512                  | 11.06 $\pm$ 1.81 mV vs. 9.36 $\pm$ 1.28 mV               | 5 vs. 9 cells   |
| Figure 4E      | Kruskal–Wallis test                 | LIII: P3-5 vs. P15-17   | <b>0.0116</b>     | ( <i>Z</i> ) 2.524                  | 0.00 $\pm$ 0.00 mV vs. 8.24 $\pm$ 0.94 mV                | 3 vs. 9 cells   |
|                |                                     | LIII: P3-5 vs. P22-24   | <b>0.0026</b>     | ( <i>Z</i> ) 3.013                  | 0.00 $\pm$ 0.00 mV vs. 11.06 $\pm$ 1.81 mV               | 3 vs. 5 cells   |
|                |                                     | LIII: P15-17 vs. P22-24 | 0.3537            | ( <i>Z</i> ) 0.928                  | 8.24 $\pm$ 0.94 mV vs. 11.06 $\pm$ 1.81 mV               | 9 vs. 5 cells   |
|                |                                     | LX: P3-5 vs. P15-17     | <b>0.0003</b>     | ( <i>Z</i> ) 3.596                  | 0.00 $\pm$ 0.00 mV vs. 6.55 $\pm$ 1.02 mV                | 18 vs. 13 cells |
|                |                                     | LX: P3-5 vs. P22-24     | <b>&lt;0.0001</b> | ( <i>Z</i> ) 4.690                  | 0.00 $\pm$ 0.00 mV vs. 9.36 $\pm$ 1.28 mV                | 18 vs. 9 cells  |
|                |                                     | LX: P15-17 vs. P22-24   | 0.1623            | ( <i>Z</i> ) 1.397                  | 6.55 $\pm$ 1.02 mV vs. 9.36 $\pm$ 1.28 mV                | 13 vs. 9 cells  |
| Figure 4 S1A1  | Kruskal–Wallis test                 | 3-5: LIII vs. LX        | 0.7708            | ( <i>Z</i> ) 0.291                  | 889.3 $\pm$ 191.1 $\Omega$ vs. 729.6 $\pm$ 75.7 $\Omega$ | 3 vs. 18 cells  |
|                |                                     | P15-17: LIII vs LX      | 0.0616            | ( <i>Z</i> ) 1.869                  | 66.76 $\pm$ 6.7 $\Omega$ vs. 108.5 $\pm$ 15.4 $\Omega$   | 10 vs. 17 cells |
|                |                                     | P22-24: LIII vs LX      | 0.4568            | ( <i>Z</i> ) 0.744                  | 77.41 $\pm$ 7.0 $\Omega$ vs. 102.4 $\pm$ 12.19 $\Omega$  | 5 vs. 9 cells   |
|                |                                     | LIII: P3-5 vs. P15-17   | <b>0.0003</b>     | ( <i>Z</i> ) 3.635                  | 889.3 $\pm$ 191.1 $\Omega$ vs. 66.76 $\pm$ 6.7 $\Omega$  | 3 vs. 10 cells  |

|                  |                                                     |                         |                   |                   |                                       |                 |
|------------------|-----------------------------------------------------|-------------------------|-------------------|-------------------|---------------------------------------|-----------------|
|                  |                                                     | LIII: P3-5 vs. P22-24   | <b>0.0059</b>     | (Z) 2.753         | 889.3 ± 191.1 Ω vs. 77.41 ± 7.0 Ω     | 3 vs. 5 cells   |
|                  |                                                     | LIII: P15-17 vs. P22-24 | 0.4850            | (Z) 0.698         | 66.76 ± 6.7 Ω vs. 77.41 ± 7.0 Ω       | 10 vs. 5 cells  |
|                  |                                                     | LX: P3-5 vs. P15-17     | <b>&lt;0.0001</b> | (Z) 4.335         | 729.6 ± 75.7 Ω vs. 108.5 ± 15.4 Ω     | 18 vs. 17 cells |
|                  |                                                     | LX: P3-5 vs. P22-24     | <b>0.0005</b>     | (Z) 3.462         | 729.6 ± 75.7 Ω vs. 102.4 ± 12.19 Ω    | 18 vs. 9 cells  |
|                  |                                                     | LX: P15-17 vs. P22-24   | 0.8986            | (Z) 0.127         | 108.5 ± 15.4 Ω vs. 102.4 ± 12.19 Ω    | 17 vs. 9 cells  |
| Figure 4<br>S1A2 | Kruskal–<br>Wallis<br>test                          | 3-5: LIII vs. LX        | 0.7974            | (Z) 0.257         | 874.7 ± 190.4 Ω vs. 716.3 ± 75.7 Ω    | 3 vs. 18 cells  |
|                  |                                                     | P15-17: LIII vs LX      | 0.0626            | (Z) 1.862         | 52.33 ± 6.4 Ω vs. 92.74 ± 15.3 Ω      | 10 vs. 17 cells |
|                  |                                                     | P22-24: LIII vs LX      | 0.4344            | (Z) 0.782         | 63.50 ± 6.4 Ω vs. 89.32 ± 11.7 Ω      | 5 vs. 9 cells   |
|                  |                                                     | LIII: P3-5 vs. P15-17   | <b>0.0003</b>     | (Z) 3.632         | 874.7 ± 190.4 Ω vs. 52.33 ± 6.4 Ω     | 3 vs. 10 cells  |
|                  |                                                     | LIII: P3-5 vs. P22-24   | <b>0.0070</b>     | (Z) 2.697         | 874.7 ± 190.4 Ω vs. 63.50 ± 6.4 Ω     | 3 vs. 5 cells   |
|                  |                                                     | LIII: P15-17 vs. P22-24 | 0.4418            | (Z) 0.769         | 52.33 ± 6.4 Ω vs. 63.50 ± 6.4 Ω       | 10 vs. 5 cells  |
|                  |                                                     | LX: P3-5 vs. P15-17     | <b>&lt;0.0001</b> | (Z) 5.656         | 716.3 ± 75.7 Ω vs. 92.74 ± 15.3 Ω     | 18 vs. 17 cells |
|                  |                                                     | LX: P3-5 vs. P22-24     | <b>0.0008</b>     | (Z) 3.364         | 716.3 ± 75.7 Ω vs. 89.32 ± 11.7 Ω     | 18 vs. 9 cells  |
| Figure 4<br>S1A3 | One-way<br>ANOVA                                    | LX: P15-17 vs. P22-24   | 0.7799            | (Z) 0.280         | 92.74 ± 15.3 Ω vs. 89.32 ± 11.7 Ω     | 17 vs. 9 cells  |
|                  |                                                     | 3-5: LIII vs. LX        | 0.3858            | (t) 0.874 (df) 56 | 14.62 ± 1.5 Ω vs. 13.25 ± 0.6 Ω       | 3 vs. 18 cells  |
|                  |                                                     | P15-17: LIII vs LX      | 0.2043            | (t) 1.284 (df) 56 | 14.43 ± 0.8 Ω vs. 15.71 ± 0.5 Ω       | 10 vs. 17 cells |
|                  |                                                     | P22-24: LIII vs LX      | 0.5386            | (t) 0.619 (df) 56 | 13.91 ± 1.4 Ω vs. 13.04 ± 1.1 Ω       | 5 vs. 9 cells   |
|                  |                                                     | LIII: P3-5 vs. P15-17   | 0.9072            | (t) 0.117 (df) 56 | 14.62 ± 1.5 Ω vs. 14.43 ± 0.8 Ω       | 3 vs. 10 cells  |
|                  |                                                     | LIII: P3-5 vs. P22-24   | 0.7008            | (t) 0.386 (df) 56 | 14.62 ± 1.5 Ω vs. 13.91 ± 1.4 Ω       | 3 vs. 5 cells   |
|                  |                                                     | LIII: P15-17 vs. P22-24 | 0.7097            | (t) 0.374 (df) 56 | 14.43 ± 0.8 Ω vs. 13.91 ± 1.4 Ω       | 10 vs. 5 cells  |
|                  |                                                     | LX: P3-5 vs. P15-17     | <b>0.0054</b>     | (t) 2.897 (df) 56 | 13.25 ± 0.6 Ω vs. 15.71 ± 0.5 Ω       | 18 vs. 17 cells |
| Figure 4<br>S1B  | One-way<br>ANOVA                                    | LX: P3-5 vs. P22-24     | 0.8414            | (t) 0.201 (df) 56 | 13.25 ± 0.6 Ω vs. 13.04 ± 1.1 Ω       | 18 vs. 9 cells  |
|                  |                                                     | LX: P15-17 vs. P22-24   | <b>0.0127</b>     | (t) 2.576 (df) 56 | 15.71 ± 0.5 Ω vs. 13.04 ± 1.1 Ω       | 17 vs. 9 cells  |
|                  |                                                     | 3-5: LIII vs. LX        | 0.3212            | (t) 1.002 (df) 51 | 12.06 ± 8.1 Vm vs. 18.07 ± 1.8 Vm     | 3 vs. 18 cells  |
|                  |                                                     | P15-17: LIII vs LX      | 0.9179            | (t) 0.104 (df) 51 | 36.79 ± 3.6 Vm vs. 37.22 ± 2.7 Vm     | 9 vs. 13 cells  |
|                  |                                                     | P22-24: LIII vs LX      | <b>0.0180</b>     | (t) 2.444 (df) 51 | 36.16 ± 4.6 Vm vs. 49.26 ± 3.4 Vm     | 5 vs. 9 cells   |
|                  |                                                     | LIII: P3-5 vs. P15-17   | <b>0.0003</b>     | (t) 3.858 (df) 51 | 12.06 ± 8.1 Vm vs. 36.79 ± 3.6 Vm     | 3 vs. 9 cells   |
|                  |                                                     | LIII: P3-5 vs. P22-24   | <b>0.0012</b>     | (t) 3.431 (df) 51 | 12.06 ± 8.1 Vm vs. 36.16 ± 4.6 Vm     | 3 vs. 5 cells   |
|                  |                                                     | LIII: P15-17 vs. P22-24 | 0.9062            | (t) 0.118 (df) 51 | 36.79 ± 3.6 Vm vs. 36.16 ± 4.6 Vm     | 9 vs. 5 cells   |
| Figure 4<br>S1C  | Brown-<br>Forsythe<br>and<br>Welch<br>ANOVA<br>test | LX: P3-5 vs. P15-17     | <b>&lt;0.0001</b> | (t) 5.473 (df) 51 | 18.07 ± 1.8 Vm vs. 37.22 ± 2.7 Vm     | 18 vs. 13 cells |
|                  |                                                     | LX: P3-5 vs. P22-24     | <b>&lt;0.0001</b> | (t) 7.947 (df) 51 | 18.07 ± 1.8 Vm vs. 49.26 ± 3.4 Vm     | 18 vs. 9 cells  |
|                  |                                                     | LX: P15-17 vs. P22-24   | <b>0.0057</b>     | (t) 2.888 (df) 51 | 37.22 ± 2.7 Vm vs. 49.26 ± 3.4 Vm     | 13 vs. 9 cells  |
|                  |                                                     | 3-5: LIII vs. LX        | >0.9999           | (t) 0.248 (df) 3  | 32.00 ± 6.7 pA vs. 30.17 ± 3.2 pA     | 3 vs. 18 cells  |
|                  |                                                     | P15-17: LIII vs LX      | 0.9287            | (t) 1.332 (df) 17 | 83.67 ± 16.2 pA vs. 56.08 ± 12.9 pA   | 9 vs. 13 cells  |
|                  |                                                     | P22-24: LIII vs LX      | 0.9882            | (t) 1.020 (df) 12 | 60.80 ± 21.0 pA vs. 93.89 ± 24.7 pA   | 5 vs. 9 cells   |
|                  |                                                     | LIII: P3-5 vs. P15-17   | 0.1519            | (t) 2.955 (df) 10 | 32.00 ± 6.7 pA vs. 83.67 ± 16.2 pA    | 3 vs. 9 cells   |
|                  |                                                     | LIII: P3-5 vs. P22-24   | 0.9049            | (t) 1.306 (df) 5  | 32.00 ± 6.7 pA vs. 60.80 ± 21.0 pA    | 3 vs. 5 cells   |
| Figure 4<br>S1D  | Kruskal–<br>Wallis<br>test                          | LIII: P15-17 vs. P22-24 | 0.9964            | (t) 0.862 (df) 9  | 83.67 ± 16.2 pA vs. 60.80 ± 21.0 pA   | 9 vs. 5 cells   |
|                  |                                                     | LX: P3-5 vs. P15-17     | 0.1071            | (t) 1.943 (df) 14 | 30.17 ± 3.2 pA vs. 56.08 ± 12.9 pA    | 18 vs. 13 cells |
|                  |                                                     | LX: P3-5 vs. P22-24     | 0.2931            | (t) 2.559 (df) 8  | 30.17 ± 3.2 pA vs. 93.89 ± 24.7 pA    | 18 vs. 9 cells  |
|                  |                                                     | LX: P15-17 vs. P22-24   | 0.9124            | (t) 1.356 (df) 12 | 56.08 ± 12.9 pA vs. 93.89 ± 24.7 pA   | 13 vs. 9 cells  |
|                  |                                                     | 3-5: LIII vs. LX        | -                 | -                 | -                                     | 3 vs. 18 cells  |
|                  |                                                     | P15-17: LIII vs LX      | 0.2252            | (Z) 1.213         | 0.09 ± 0.01 msec vs. 0.14 ± 0.03 msec | 9 vs. 13 cells  |
|                  |                                                     | P22-24: LIII vs LX      | <b>0.0196</b>     | (Z) 2.333         | 0.12 ± 0.02 msec vs. 0.29 ± 0.07 msec | 5 vs. 9 cells   |
|                  |                                                     | LIII: P15-17 vs. P22-24 | 0.3718            | (Z) 0.893         | 0.09 ± 0.01 msec vs. 0.12 ± 0.02 msec | 9 vs. 5 cells   |
| Figure 4<br>S1D  |                                                     | LX: P15-17 vs. P22-24   | <b>0.0046</b>     | (Z) 2.834         | 0.14 ± 0.03 msec vs. 0.29 ± 0.07 msec | 13 vs. 9 cells  |

**Table S5.** Statistical data for in vitro whole cell patch electrophysiology in the juvenile mouse (P15-17), for negative and positive current step analysis. Descriptive values are represented as  $\pm$  SEM. Abbreviations: LIII = Lobule III, LX = Lobule X,  $df$  = degrees of freedom, Hz = hertz, mV = millivolt.

| Related Figure | Test Applied           | Group                | <i>p</i> -Value   | Population-Value                      | Descriptive Values                           | Population Size |
|----------------|------------------------|----------------------|-------------------|---------------------------------------|----------------------------------------------|-----------------|
| Figure 5A1     | Mixed-effects analysis | -0 pA: LIII vs. LX   |                   |                                       | 0.00 $\pm$ 0.0 mV vs. 0.00 $\pm$ 0.0 mV      | 9 vs. 14 cells  |
|                |                        | -40 pA: LIII vs. LX  | 0.0515            | ( <i>t</i> ) 1.956 ( <i>df</i> ) 258  | -7.51 $\pm$ 2.3 mV vs. -2.59 $\pm$ 0.9 mV    | 9 vs. 14 cells  |
|                |                        | -80 pA: LIII vs. LX  | 0.5948            | ( <i>t</i> ) 0.533 ( <i>df</i> ) 258  | -13.63 $\pm$ 1.2 mV vs. -12.29 $\pm$ 1.8 mV  | 9 vs. 14 cells  |
|                |                        | -120 pA: LIII vs. LX | 0.4763            | ( <i>t</i> ) 0.713 ( <i>df</i> ) 258  | -15.76 $\pm$ 1.3 mV vs. -17.55 $\pm$ 1.6 mV  | 9 vs. 14 cells  |
|                |                        | -160 pA: LIII vs. LX | 0.4571            | ( <i>t</i> ) 0.745 ( <i>df</i> ) 258  | -17.76 $\pm$ 1.3 mV vs. -19.44 $\pm$ 1.6 mV  | 9 vs. 14 cells  |
|                |                        | -200 pA: LIII vs. LX | 0.1532            | ( <i>t</i> ) 1.432 ( <i>df</i> ) 258  | -19.44 $\pm$ 1.4 mV vs. -23.04 $\pm$ 1.7 mV  | 9 vs. 14 cells  |
|                |                        | -240 pA: LIII vs. LX | 0.0743            | ( <i>t</i> ) 1.792 ( <i>df</i> ) 258  | -20.95 $\pm$ 1.5 mV vs. -25.45 $\pm$ 1.6 mV  | 9 vs. 14 cells  |
|                |                        | -280 pA: LIII vs. LX | 0.0574            | ( <i>t</i> ) 1.909 ( <i>df</i> ) 258  | -22.79 $\pm$ 1.6 mV vs. -27.59 $\pm$ 1.5 mV  | 9 vs. 14 cells  |
|                |                        | -320 pA: LIII vs. LX | <b>0.0291</b>     | ( <i>t</i> ) 2.195 ( <i>df</i> ) 258  | -24.38 $\pm$ 1.6 mV vs. -29.89 $\pm$ 1.6 mV  | 9 vs. 14 cells  |
|                |                        | -360 pA: LIII vs. LX | <b>0.0211</b>     | ( <i>t</i> ) 2.321 ( <i>df</i> ) 258  | -26.03 $\pm$ 1.7 mV vs. -31.86 $\pm$ 1.6 mV  | 9 vs. 14 cells  |
|                |                        | -400 pA: LIII vs. LX | <b>0.0083</b>     | ( <i>t</i> ) 2.661 ( <i>df</i> ) 258  | -27.60 $\pm$ 1.9 mV vs. -34.29 $\pm$ 1.7 mV  | 9 vs. 14 cells  |
|                |                        | -440 pA: LIII vs. LX | <b>0.0067</b>     | ( <i>t</i> ) 2.731 ( <i>df</i> ) 258  | -27.12 $\pm$ 5.4 mV vs. -41.42 $\pm$ 5.0 mV  | 2 vs. 3 cells   |
|                |                        | -480 pA: LIII vs. LX | <b>0.0013</b>     | ( <i>t</i> ) 3.245 ( <i>df</i> ) 258  | -28.59 $\pm$ 6.0 mV vs. -45.05 $\pm$ 5.4 mV  | 2 vs. 3 cells   |
|                |                        | -520 pA: LIII vs. LX | <b>0.0002</b>     | ( <i>t</i> ) 3.751 ( <i>df</i> ) 258  | -30.03 $\pm$ 6.7 mV vs. -48.62 $\pm$ 5.8 mV  | 2 vs. 3 cells   |
|                |                        | -560 pA: LIII vs. LX | <b>&lt;0.0001</b> | ( <i>t</i> ) 4.303 ( <i>df</i> ) 258  | -31.63 $\pm$ 7.3 mV vs. -52.55 $\pm$ 6.4 mV  | 2 vs. 3 cells   |
|                |                        | -600 pA: LIII vs. LX | <b>&lt;0.0001</b> | ( <i>t</i> ) 4.945 ( <i>df</i> ) 258  | -32.60 $\pm$ 7.0 mV vs. -56.22 $\pm$ 6.7 mV  | 2 vs. 3 cells   |
|                |                        | -640 pA: LIII vs. LX | <b>&lt;0.0001</b> | ( <i>t</i> ) 5.282 ( <i>df</i> ) 258  | -35.08 $\pm$ 8.4 mV vs. -60.12 $\pm$ 7.2 mV  | 2 vs. 3 cells   |
| Figure 5A2     | Mixed-effects analysis | -680 pA: LIII vs. LX | <b>&lt;0.0001</b> | ( <i>t</i> ) 5.654 ( <i>df</i> ) 258  | -37.07 $\pm$ 9.2 mV vs. -63.68 $\pm$ 7.8 mV  | 2 vs. 3 cells   |
|                |                        | -720 pA: LIII vs. LX | <b>&lt;0.0001</b> | ( <i>t</i> ) 5.785 ( <i>df</i> ) 258  | -38.90 $\pm$ 9.7 mV vs. -66.06 $\pm$ 7.4 mV  | 2 vs. 3 cells   |
|                |                        | -760 pA: LIII vs. LX | <b>&lt;0.0001</b> | ( <i>t</i> ) 5.933 ( <i>df</i> ) 258  | -40.67 $\pm$ 10.3 mV vs. -68.45 $\pm$ 7.4 mV | 2 vs. 3 cells   |
|                |                        | -0 pA: LIII vs. LX   | 0.7509            | ( <i>t</i> ) 0.318 ( <i>df</i> ) 420  | 48.11 $\pm$ 10.0 Hz vs. 46.79 $\pm$ 7.3 Hz   | 9 vs. 14 cells  |
|                |                        | -40 pA: LIII vs. LX  | <b>0.0019</b>     | ( <i>t</i> ) 3.129 ( <i>df</i> ) 420  | 16.44 $\pm$ 8.3 Hz vs. 29.50 $\pm$ 6.5 Hz    | 9 vs. 14 cells  |
|                |                        | -80 pA: LIII vs. LX  | <b>0.0255</b>     | ( <i>t</i> ) 2.242 ( <i>df</i> ) 420  | 0.00 $\pm$ 0.0 Hz vs. 9.36 $\pm$ 5.5 Hz      | 9 vs. 14 cells  |
|                |                        | -120 pA: LIII vs. LX | 0.3131            | ( <i>t</i> ) 1.010 ( <i>df</i> ) 420  | 0.00 $\pm$ 0.0 Hz vs. 4.21 $\pm$ 4.2 Hz      | 9 vs. 14 cells  |
|                |                        | -160 pA: LIII vs. LX | 0.4517            | ( <i>t</i> ) 0.753 ( <i>df</i> ) 420  | 0.00 $\pm$ 0.0 Hz vs. 3.14 $\pm$ 3.1 Hz      | 9 vs. 14 cells  |
|                |                        | -200 pA: LIII vs. LX | >0.9999           | ( <i>t</i> ) 0.000 ( <i>df</i> ) 420  | 0.00 $\pm$ 0.0 Hz vs. 0.00 $\pm$ 0.0 Hz      | 9 vs. 14 cells  |
|                |                        | -240 pA: LIII vs. LX | >0.9999           | ( <i>t</i> ) 0.000 ( <i>df</i> ) 420  | 0.00 $\pm$ 0.0 Hz vs. 0.00 $\pm$ 0.0 Hz      | 9 vs. 14 cells  |
|                |                        | -280 pA: LIII vs. LX | >0.9999           | ( <i>t</i> ) 0.000 ( <i>df</i> ) 420  | 0.00 $\pm$ 0.0 Hz vs. 0.00 $\pm$ 0.0 Hz      | 9 vs. 14 cells  |
|                |                        | -320 pA: LIII vs. LX | >0.9999           | ( <i>t</i> ) 0.000 ( <i>df</i> ) 420  | 0.00 $\pm$ 0.0 Hz vs. 0.00 $\pm$ 0.0 Hz      | 9 vs. 14 cells  |
|                |                        | -360 pA: LIII vs. LX | >0.9999           | ( <i>t</i> ) 0.000 ( <i>df</i> ) 420  | 0.00 $\pm$ 0.0 Hz vs. 0.00 $\pm$ 0.0 Hz      | 9 vs. 14 cells  |
|                |                        | -400 pA: LIII vs. LX | >0.9999           | ( <i>t</i> ) 0.000 ( <i>df</i> ) 420  | 0.00 $\pm$ 0.0 Hz vs. 0.00 $\pm$ 0.0 Hz      | 9 vs. 14 cells  |
|                |                        | -440 pA: LIII vs. LX | >0.9999           | ( <i>t</i> ) 0.000 ( <i>df</i> ) 420  | 0.00 $\pm$ 0.0 Hz vs. 0.00 $\pm$ 0.0 Hz      | 2 vs. 3 cells   |
|                |                        | -480 pA: LIII vs. LX | >0.9999           | ( <i>t</i> ) 0.000 ( <i>df</i> ) 420  | 0.00 $\pm$ 0.0 Hz vs. 0.00 $\pm$ 0.0 Hz      | 2 vs. 3 cells   |
|                |                        | -520 pA: LIII vs. LX | >0.9999           | ( <i>t</i> ) 0.000 ( <i>df</i> ) 420  | 0.00 $\pm$ 0.0 Hz vs. 0.00 $\pm$ 0.0 Hz      | 2 vs. 3 cells   |
| Figure 5B1     | Mixed-effects analysis | -560 pA: LIII vs. LX | >0.9999           | ( <i>t</i> ) 0.000 ( <i>df</i> ) 420  | 0.00 $\pm$ 0.0 Hz vs. 0.00 $\pm$ 0.0 Hz      | 2 vs. 3 cells   |
|                |                        | -600 pA: LIII vs. LX | >0.9999           | ( <i>t</i> ) 0.000 ( <i>df</i> ) 420  | 0.00 $\pm$ 0.0 Hz vs. 0.00 $\pm$ 0.0 Hz      | 2 vs. 3 cells   |
|                |                        | -640 pA: LIII vs. LX | >0.9999           | ( <i>t</i> ) 0.000 ( <i>df</i> ) 420  | 0.00 $\pm$ 0.0 Hz vs. 0.00 $\pm$ 0.0 Hz      | 2 vs. 3 cells   |
|                |                        | -680 pA: LIII vs. LX | >0.9999           | ( <i>t</i> ) 0.000 ( <i>df</i> ) 420  | 0.00 $\pm$ 0.0 Hz vs. 0.00 $\pm$ 0.0 Hz      | 2 vs. 3 cells   |
|                |                        | -720 pA: LIII vs. LX | >0.9999           | ( <i>t</i> ) 0.000 ( <i>df</i> ) 420  | 0.00 $\pm$ 0.0 Hz vs. 0.00 $\pm$ 0.0 Hz      | 2 vs. 3 cells   |
|                |                        | -760 pA: LIII vs. LX | >0.9999           | ( <i>t</i> ) 0.000 ( <i>df</i> ) 420  | 0.00 $\pm$ 0.0 Hz vs. 0.00 $\pm$ 0.0 Hz      | 2 vs. 3 cells   |
|                |                        | 0 pA: LIII vs. LX    |                   |                                       | 0.00 $\pm$ 0.0 mV vs. 0.00 $\pm$ 0.0 mV      | 8 vs. 12 cells  |
|                |                        | 40 pA: LIII vs. LX   | 0.9486            | ( <i>t</i> ) 0.065 ( <i>df</i> ) 360  | 3.83 $\pm$ 1.8 mV vs. 3.68 $\pm$ 0.8 mV      | 8 vs. 12 cells  |
|                |                        | 80 pA: LIII vs. LX   | 0.1793            | ( <i>t</i> ) 1.345 ( <i>df</i> ) 360  | 6.28 $\pm$ 1.9 mV vs. 9.37 $\pm$ 1.2 mV      | 8 vs. 12 cells  |
|                |                        | 120 pA: LIII vs. LX  | 0.0522            | ( <i>t</i> ) 1.948 ( <i>df</i> ) 360  | 9.41 $\pm$ 1.7 mV vs. 13.89 $\pm$ 1.4 mV     | 8 vs. 12 cells  |
|                |                        | 160 pA: LIII vs. LX  | 0.3968            | ( <i>t</i> ) 0.8484 ( <i>df</i> ) 360 | 13.16 $\pm$ 1.5 mV vs. 15.11 $\pm$ 1.3 mV    | 8 vs. 12 cells  |
|                |                        | 200 pA: LIII vs. LX  | 0.5652            | ( <i>t</i> ) 0.5757 ( <i>df</i> ) 360 | 15.03 $\pm$ 1.4 mV vs. 16.36 $\pm$ 1.3 mV    | 8 vs. 12 cells  |
|                |                        | 240 pA: LIII vs. LX  | 0.5147            | ( <i>t</i> ) 0.6522 ( <i>df</i> ) 360 | 16.07 $\pm$ 1.5 mV vs. 17.57 $\pm$ 1.3 mV    | 8 vs. 12 cells  |
|                |                        | 280 pA: LIII vs. LX  | 0.4095            | ( <i>t</i> ) 0.8257 ( <i>df</i> ) 360 | 16.81 $\pm$ 1.5 mV vs. 18.71 $\pm$ 1.1 mV    | 8 vs. 12 cells  |
|                |                        | 320 pA: LIII vs. LX  | 0.4746            | ( <i>t</i> ) 0.7158 ( <i>df</i> ) 360 | 17.74 $\pm$ 1.5 mV vs. 19.39 $\pm$ 1.1 mV    | 8 vs. 12 cells  |
|                |                        | 360 pA: LIII vs. LX  | 0.7415            | ( <i>t</i> ) 0.3302 ( <i>df</i> ) 360 | 18.70 $\pm$ 1.5 mV vs. 19.46 $\pm$ 1.4 mV    | 8 vs. 12 cells  |
|                |                        | 400 pA: LIII vs. LX  | 0.9070            | ( <i>t</i> ) 0.1170 ( <i>df</i> ) 360 | 19.80 $\pm$ 1.4 mV vs. 20.07 $\pm$ 1.4 mV    | 8 vs. 12 cells  |
|                |                        | 440 pA: LIII vs. LX  | 0.5091            | ( <i>t</i> ) 0.6609 ( <i>df</i> ) 360 | 22.33 $\pm$ 2.5 mV vs. 20.82 $\pm$ 1.3 mV    | 8 vs. 12 cells  |
|                |                        | 480 pA: LIII vs. LX  | 0.5194            | ( <i>t</i> ) 0.6449 ( <i>df</i> ) 360 | 22.93 $\pm$ 2.6 mV vs. 21.45 $\pm$ 1.2 mV    | 8 vs. 12 cells  |
|                |                        | 520 pA: LIII vs. LX  | 0.5967            | ( <i>t</i> ) 0.5296 ( <i>df</i> ) 360 | 23.85 $\pm$ 2.7 mV vs. 22.63 $\pm$ 1.3 mV    | 8 vs. 12 cells  |
|                |                        | 560 pA: LIII vs. LX  | 0.8822            | ( <i>t</i> ) 0.1483 ( <i>df</i> ) 360 | 24.91 $\pm$ 2.8 mV vs. 24.56 $\pm$ 1.9 mV    | 8 vs. 12 cells  |
|                |                        | 600 pA: LIII vs. LX  | 0.6381            | ( <i>t</i> ) 0.4707 ( <i>df</i> ) 360 | 26.00 $\pm$ 2.8 mV vs. 24.92 $\pm$ 1.1 mV    | 8 vs. 12 cells  |
|                |                        | 640 pA: LIII vs. LX  | 0.6201            | ( <i>t</i> ) 0.4961 ( <i>df</i> ) 360 | 26.74 $\pm$ 2.7 mV vs. 25.60 $\pm$ 1.1 mV    | 8 vs. 12 cells  |
|                |                        | 680 pA: LIII vs. LX  | 0.6735            | ( <i>t</i> ) 0.4217 ( <i>df</i> ) 360 | 27.55 $\pm$ 2.8 mV vs. 26.58 $\pm$ 1.1 mV    | 8 vs. 12 cells  |

|             |                        |                      |               |                                       |                                       |                |
|-------------|------------------------|----------------------|---------------|---------------------------------------|---------------------------------------|----------------|
|             |                        | 720 pA: LIII vs. LX  | 0.6445        | ( <i>t</i> ) 0.4618 ( <i>df</i> ) 360 | 28.47 ± 2.8 mV vs. 27.41 ± 1.2 mV     | 8 vs. 12 cells |
|             |                        | 760 pA: LIII vs. LX  | 0.5222        | ( <i>t</i> ) 0.6404 ( <i>df</i> ) 360 | 29.22 ± 2.9 mV vs. 27.74 ± 1.1 mV     | 8 vs. 12 cells |
| Figure 5B2  | Two-way ANOVA          | 0 pA: LIII vs. LX    | >0.9999       | ( <i>t</i> ) 0.000 ( <i>df</i> ) 360  | 0.00 ± 0.0 Hz vs. 0.00 ± 0.0 Hz       | 8 vs. 12 cells |
|             |                        | 40 pA: LIII vs. LX   | 0.7705        | ( <i>t</i> ) 0.292 ( <i>df</i> ) 360  | 6.88 ± 6.9 Hz vs. 1.00 ± 1.0 Hz       | 8 vs. 12 cells |
|             |                        | 80 pA: LIII vs. LX   | 0.8898        | ( <i>t</i> ) 0.139 ( <i>df</i> ) 360  | 18.38 ± 11.8 Hz vs. 15.58 ± 5.6 Hz    | 8 vs. 12 cells |
|             |                        | 120 pA: LIII vs. LX  | 0.7626        | ( <i>t</i> ) 0.302 ( <i>df</i> ) 360  | 29.00 ± 14.1 Hz vs. 35.08 ± 6.9 Hz    | 8 vs. 12 cells |
|             |                        | 160 pA: LIII vs. LX  | 0.8979        | ( <i>t</i> ) 0.128 ( <i>df</i> ) 360  | 41.50 ± 15.1 Hz vs. 44.08 ± 7.6 Hz    | 8 vs. 12 cells |
|             |                        | 200 pA: LIII vs. LX  | 0.8930        | ( <i>t</i> ) 0.135 ( <i>df</i> ) 360  | 54.13 ± 15.8 Hz vs. 51.42 ± 8.0 Hz    | 8 vs. 12 cells |
|             |                        | 240 pA: LIII vs. LX  | 0.7563        | ( <i>t</i> ) 0.311 ( <i>df</i> ) 360  | 64.00 ± 16.7 Hz vs. 57.75 ± 8.4 Hz    | 8 vs. 12 cells |
|             |                        | 280 pA: LIII vs. LX  | 0.6731        | ( <i>t</i> ) 0.422 ( <i>df</i> ) 360  | 73.50 ± 18.2 Hz vs. 65.00 ± 8.8 Hz    | 8 vs. 12 cells |
|             |                        | 320 pA: LIII vs. LX  | 0.6343        | ( <i>t</i> ) 0.476 ( <i>df</i> ) 360  | 82.00 ± 19.1 Hz vs. 72.42 ± 8.4 Hz    | 8 vs. 12 cells |
|             |                        | 360 pA: LIII vs. LX  | 0.5542        | ( <i>t</i> ) 0.592 ( <i>df</i> ) 360  | 90.75 ± 19.8 Hz vs. 78.83 ± 8.7 Hz    | 8 vs. 12 cells |
|             |                        | 400 pA: LIII vs. LX  | 0.4188        | ( <i>t</i> ) 0.809 ( <i>df</i> ) 360  | 99.88 ± 18.3 Hz vs. 83.58 ± 9.0 Hz    | 8 vs. 12 cells |
|             |                        | 440 pA: LIII vs. LX  | 0.5350        | ( <i>t</i> ) 0.621 ( <i>df</i> ) 360  | 100.75 ± 16.1 Hz vs. 88.25 ± 9.3 Hz   | 8 vs. 12 cells |
|             |                        | 480 pA: LIII vs. LX  | 0.8458        | ( <i>t</i> ) 0.195 ( <i>df</i> ) 360  | 97.50 ± 16.6 Hz vs. 93.58 ± 9.7 Hz    | 8 vs. 12 cells |
|             |                        | 520 pA: LIII vs. LX  | 0.7438        | ( <i>t</i> ) 0.327 ( <i>df</i> ) 360  | 91.50 ± 24.3 Hz vs. 98.08 ± 10.1 Hz   | 8 vs. 12 cells |
|             |                        | 560 pA: LIII vs. LX  | 0.9571        | ( <i>t</i> ) 0.054 ( <i>df</i> ) 360  | 97.25 ± 25.6 Hz vs. 98.33 ± 10.9 Hz   | 8 vs. 12 cells |
|             |                        | 600 pA: LIII vs. LX  | 0.8963        | ( <i>t</i> ) 0.130 ( <i>df</i> ) 360  | 102.88 ± 27.1 Hz vs. 105.50 ± 10.5 Hz | 8 vs. 12 cells |
|             |                        | 640 pA: LIII vs. LX  | 0.9291        | ( <i>t</i> ) 0.089 ( <i>df</i> ) 360  | 108.38 ± 28.6 Hz vs. 110.17 ± 10.7 Hz | 8 vs. 12 cells |
|             |                        | 680 pA: LIII vs. LX  | 0.9357        | ( <i>t</i> ) 0.081 ( <i>df</i> ) 360  | 112.38 ± 30.1 Hz vs. 114.00 ± 10.8 Hz | 8 vs. 12 cells |
|             |                        | 720 pA: LIII vs. LX  | 0.9127        | ( <i>t</i> ) 0.110 ( <i>df</i> ) 360  | 115.13 ± 31.4 Hz vs. 117.33 ± 11.0 Hz | 8 vs. 12 cells |
|             |                        | 760 pA: LIII vs. LX  | 0.9160        | ( <i>t</i> ) 0.106 ( <i>df</i> ) 360  | 117.88 ± 32.1 Hz vs. 120.00 ± 11.0 Hz | 8 vs. 12 cells |
| Figure 5S1A | Mixed-effects analysis | -0 pA: LIII vs. LX   |               |                                       | 0.00 ± 0.0 mV vs. 0.00 ± 0.0 mV       | 9 vs. 14 cells |
|             |                        | -40 pA: LIII vs. LX  | 0.1468        | ( <i>t</i> ) 1.541 ( <i>df</i> ) 13   | 2.71 ± 1.0 mV vs. 0.98 ± 0.6 mV       | 9 vs. 14 cells |
|             |                        | -80 pA: LIII vs. LX  | 0.4077        | ( <i>t</i> ) 0.845 ( <i>df</i> ) 21   | 4.36 ± 0.5 mV vs. 3.60 ± 0.7 mV       | 9 vs. 14 cells |
|             |                        | -120 pA: LIII vs. LX | 0.9351        | ( <i>t</i> ) 0.082 ( <i>df</i> ) 20   | 6.07 ± 0.8 mV vs. 5.98 ± 0.8 mV       | 9 vs. 14 cells |
|             |                        | -160 pA: LIII vs. LX | 0.8841        | ( <i>t</i> ) 0.148 ( <i>df</i> ) 14   | 7.25 ± 0.8 mV vs. 7.07 ± 0.9 mV       | 9 vs. 14 cells |
|             |                        | -200 pA: LIII vs. LX | 0.6238        | ( <i>t</i> ) 0.501 ( <i>df</i> ) 20   | 8.17 ± 0.9 mV vs. 8.70 ± 0.6 mV       | 9 vs. 14 cells |
|             |                        | -240 pA: LIII vs. LX | 0.4813        | ( <i>t</i> ) 0.717 ( <i>df</i> ) 20   | 9.14 ± 0.8 mV vs. 10.00 ± 0.9 mV      | 9 vs. 14 cells |
|             |                        | -280 pA: LIII vs. LX | 0.3542        | ( <i>t</i> ) 0.949 ( <i>df</i> ) 19   | 10.01 ± 0.9 mV vs. 11.26 ± 0.9 mV     | 9 vs. 14 cells |
|             |                        | -320 pA: LIII vs. LX | 0.1522        | ( <i>t</i> ) 1.490 ( <i>df</i> ) 18   | 10.27 ± 1.0 mV vs. 12.24 ± 0.9 mV     | 9 vs. 14 cells |
|             |                        | -360 pA: LIII vs. LX | 0.3530        | ( <i>t</i> ) 0.954 ( <i>df</i> ) 17   | 11.74 ± 1.1 mV vs. 13.09 ± 0.9 mV     | 9 vs. 14 cells |
|             |                        | -400 pA: LIII vs. LX | 0.296         | ( <i>t</i> ) 1.079 ( <i>df</i> ) 3    | 12.31 ± 1.2 mV vs. 13.89 ± 0.9 mV     | 9 vs. 14 cells |
|             |                        | -440 pA: LIII vs. LX | 0.2426        | ( <i>t</i> ) 1.472 ( <i>df</i> ) 3    | 13.79 ± 1.6 mV vs. 17.20 ± 1.7 mV     | 2 vs. 3 cells  |
|             |                        | -480 pA: LIII vs. LX | 0.2694        | ( <i>t</i> ) 1.362 ( <i>df</i> ) 3    | 14.41 ± 1.3 mV vs. 17.60 ± 1.5 mV     | 2 vs. 3 cells  |
|             |                        | -520 pA: LIII vs. LX | 0.4793        | ( <i>t</i> ) 0.823 ( <i>df</i> ) 3    | 14.94 ± 1.6 mV vs. 16.79 ± 1.6 mV     | 2 vs. 3 cells  |
|             |                        | -560 pA: LIII vs. LX | 0.4976        | ( <i>t</i> ) 0.783 ( <i>df</i> ) 2    | 15.28 ± 1.4 mV vs. 16.87 ± 1.4 mV     | 2 vs. 3 cells  |
|             |                        | -600 pA: LIII vs. LX | 0.9716        | ( <i>t</i> ) 0.040 ( <i>df</i> ) 3    | 16.42 ± 2.0 mV vs. 16.32 ± 1.4 mV     | 2 vs. 3 cells  |
|             |                        | -640 pA: LIII vs. LX | 0.9944        | ( <i>t</i> ) 0.008 ( <i>df</i> ) 2    | 16.25 ± 0.9 mV vs. 16.24 ± 1.5 mV     | 2 vs. 3 cells  |
|             |                        | -680 pA: LIII vs. LX | 0.5381        | ( <i>t</i> ) 0.719 ( <i>df</i> ) 2    | 16.80 ± 0.6 mV vs. 15.19 ± 2.1 mV     | 2 vs. 3 cells  |
|             |                        | -720 pA: LIII vs. LX | 0.8118        | ( <i>t</i> ) 0.301 ( <i>df</i> ) 1    | 16.88 ± 0.1 mV vs. 17.11 ± 0.8 mV     | 2 vs. 3 cells  |
|             |                        | -760 pA: LIII vs. LX | 0.4779        | ( <i>t</i> ) 1.070 ( <i>df</i> ) 1    | 17.80 ± 0.1 mV vs. 16.60 ± 1.1 mV     | 2 vs. 3 cells  |
| Figure 5S1B | Two-way ANOVA          | 0 pA: LIII vs. LX    | >0.9999       | ( <i>t</i> ) 0.000 ( <i>df</i> ) 380  | 0.00 ± 0.0 mV vs. 0.00 ± 0.0 mV       | 8 vs. 12 cells |
|             |                        | 40 pA: LIII vs. LX   | 0.6175        | ( <i>t</i> ) 0.500 ( <i>df</i> ) 380  | 1.18 ± 1.2 mV vs. 0.55 ± 0.6 mV       | 8 vs. 12 cells |
|             |                        | 80 pA: LIII vs. LX   | 0.7990        | ( <i>t</i> ) 0.255 ( <i>df</i> ) 380  | 2.67 ± 1.2 mV vs. 2.99 ± 0.8 mV       | 8 vs. 12 cells |
|             |                        | 120 pA: LIII vs. LX  | 0.6746        | ( <i>t</i> ) 0.420 ( <i>df</i> ) 380  | 3.71 ± 1.5 mV vs. 4.24 ± 0.7 mV       | 8 vs. 12 cells |
|             |                        | 160 pA: LIII vs. LX  | 0.6921        | ( <i>t</i> ) 0.396 ( <i>df</i> ) 380  | 5.66 ± 1.4 mV vs. 5.16 ± 0.8 mV       | 8 vs. 12 cells |
|             |                        | 200 pA: LIII vs. LX  | 0.2857        | ( <i>t</i> ) 1.069 ( <i>df</i> ) 380  | 6.73 ± 1.2 mV vs. 5.39 ± 0.7 mV       | 8 vs. 12 cells |
|             |                        | 240 pA: LIII vs. LX  | 0.2216        | ( <i>t</i> ) 1.224 ( <i>df</i> ) 380  | 6.98 ± 1.2 mV vs. 5.44 ± 0.8 mV       | 8 vs. 12 cells |
|             |                        | 280 pA: LIII vs. LX  | 0.2847        | ( <i>t</i> ) 1.071 ( <i>df</i> ) 380  | 7.17 ± 1.3 mV vs. 5.82 ± 0.6 mV       | 8 vs. 12 cells |
|             |                        | 320 pA: LIII vs. LX  | 0.3375        | ( <i>t</i> ) 0.960 ( <i>df</i> ) 380  | 7.47 ± 1.3 mV vs. 6.26 ± 0.7 mV       | 8 vs. 12 cells |
|             |                        | 360 pA: LIII vs. LX  | <b>0.0348</b> | ( <i>t</i> ) 2.118 ( <i>df</i> ) 380  | 8.86 ± 0.7 mV vs. 6.20 ± 0.6 mV       | 8 vs. 12 cells |
|             |                        | 400 pA: LIII vs. LX  | <b>0.0405</b> | ( <i>t</i> ) 2.055 ( <i>df</i> ) 380  | 9.08 ± 0.7 mV vs. 6.49 ± 0.7 mV       | 8 vs. 12 cells |
|             |                        | 440 pA: LIII vs. LX  | 0.0504        | ( <i>t</i> ) 1.963 ( <i>df</i> ) 380  | 9.30 ± 0.8 mV vs. 6.83 ± 0.7 mV       | 8 vs. 12 cells |
|             |                        | 480 pA: LIII vs. LX  | 0.0641        | ( <i>t</i> ) 1.857 ( <i>df</i> ) 380  | 9.23 ± 0.8 mV vs. 6.90 ± 0.8 mV       | 8 vs. 12 cells |
|             |                        | 520 pA: LIII vs. LX  | <b>0.0371</b> | ( <i>t</i> ) 2.092 ( <i>df</i> ) 380  | 9.42 ± 0.8 mV vs. 6.79 ± 0.8 mV       | 8 vs. 12 cells |
|             |                        | 560 pA: LIII vs. LX  | <b>0.0455</b> | ( <i>t</i> ) 2.007 ( <i>df</i> ) 380  | 9.60 ± 0.9 mV vs. 7.08 ± 0.8 mV       | 8 vs. 12 cells |
|             |                        | 600 pA: LIII vs. LX  | 0.0641        | ( <i>t</i> ) 1.857 ( <i>df</i> ) 380  | 9.67 ± 1.1 mV vs. 7.34 ± 0.8 mV       | 8 vs. 12 cells |
|             |                        | 640 pA: LIII vs. LX  | 0.1420        | ( <i>t</i> ) 1.472 ( <i>df</i> ) 380  | 9.51 ± 1.2 mV vs. 7.66 ± 0.8 mV       | 8 vs. 12 cells |
|             |                        | 680 pA: LIII vs. LX  | 0.1660        | ( <i>t</i> ) 1.388 ( <i>df</i> ) 380  | 9.47 ± 1.3 mV vs. 7.72 ± 0.8 mV       | 8 vs. 12 cells |
|             |                        | 720 pA: LIII vs. LX  | 0.1552        | ( <i>t</i> ) 1.424 ( <i>df</i> ) 380  | 9.62 ± 1.3 mV vs. 7.83 ± 0.8 mV       | 8 vs. 12 cells |
|             |                        | 760 pA: LIII vs. LX  | 0.1468        | ( <i>t</i> ) 1.454 ( <i>df</i> ) 380  | 9.65 ± 1.3 mV vs. 7.82 ± 0.7 mV       | 8 vs. 12 cells |

**Table S6.** Statistical data for in vitro whole cell patch electrophysiology in the juvenile mouse (P15-17), for negative and positive current ramp analysis. Descriptive values are represented as  $\pm$  SEM. Abbreviations: LIII = Lobule III, LIII $\downarrow$  = Lobule III downphase at the current ramp, LIII $\uparrow$  = Lobule III upphase at the current ramp, LX = Lobule X, LX $\downarrow$  = Lobule X downphase at the current ramp, LX $\uparrow$  = Lobule X upphase at the current ramp, *df* = degrees of freedom, Hz = hertz, mV = millivolt.

| Related Figure | Test Applied  | Group                                          | <i>p</i> -Value   | Population-Value                     | Descriptive Values                          | Population Size |
|----------------|---------------|------------------------------------------------|-------------------|--------------------------------------|---------------------------------------------|-----------------|
| Figure 6A1     | Two-way ANOVA | -0 pA: LIII vs. LX                             |                   |                                      | 0.00 $\pm$ 0.0 mV vs. 0.00 $\pm$ 0.0 mV     | 9 vs. 15 cells  |
|                |               | -0 pA: LIII vs. LX                             | 0.6918            | ( <i>t</i> ) 0.048 ( <i>df</i> ) 748 | 0.01 $\pm$ 0.1 mV vs. -0.07 $\pm$ 0.0 mV    | 9 vs. 15 cells  |
|                |               | -0 pA: LIII vs. LX                             | 0.9354            | ( <i>t</i> ) 0.081 ( <i>df</i> ) 748 | 0.11 $\pm$ 0.1 mV vs. -0.02 $\pm$ 0.0 mV    | 9 vs. 15 cells  |
|                |               | -0 pA: LIII vs. LX                             | 0.9920            | ( <i>t</i> ) 0.010 ( <i>df</i> ) 748 | 0.02 $\pm$ 0.1 mV vs. 0.00 $\pm$ 0.0 mV     | 9 vs. 15 cells  |
|                |               | -0 pA: LIII vs. LX                             | 0.9503            | ( <i>t</i> ) 0.062 ( <i>df</i> ) 748 | 0.11 $\pm$ 0.1 mV vs. 0.01 $\pm$ 0.0 mV     | 9 vs. 15 cells  |
|                |               | -0 pA: LIII vs. LX                             | 0.8939            | ( <i>t</i> ) 0.133 ( <i>df</i> ) 748 | 0.18 $\pm$ 0.2 mV vs. -0.04 $\pm$ 0.0 mV    | 9 vs. 15 cells  |
|                |               | -0 pA: LIII vs. LX                             | 0.9374            | ( <i>t</i> ) 0.079 ( <i>df</i> ) 748 | 0.13 $\pm$ 0.2 mV vs. -0.01 $\pm$ 0.1 mV    | 9 vs. 15 cells  |
|                |               | -0 pA: LIII vs. LX                             | 0.9191            | ( <i>t</i> ) 0.102 ( <i>df</i> ) 748 | 0.14 $\pm$ 0.2 mV vs. -0.03 $\pm$ 0.0 mV    | 9 vs. 15 cells  |
|                |               | -0 pA: LIII vs. LX                             | 0.9394            | ( <i>t</i> ) 0.076 ( <i>df</i> ) 748 | 0.09 $\pm$ 0.2 mV vs. -0.04 $\pm$ 0.1 mV    | 9 vs. 15 cells  |
|                |               | -0 pA: LIII vs. LX                             | 0.8930            | ( <i>t</i> ) 0.135 ( <i>df</i> ) 748 | 0.16 $\pm$ 0.2 mV vs. -0.07 $\pm$ 0.1 mV    | 9 vs. 15 cells  |
|                |               | -40 pA: LIII vs. LX                            | 0.9745            | ( <i>t</i> ) 0.032 ( <i>df</i> ) 748 | -0.50 $\pm$ 0.2 mV vs. -0.55 $\pm$ 0.1 mV   | 9 vs. 15 cells  |
|                |               | -80 pA: LIII vs. LX                            | <b>0.0292</b>     | ( <i>t</i> ) 2.185 ( <i>df</i> ) 748 | -7.40 $\pm$ 2.1 mV vs. -3.73 $\pm$ 1.3 mV   | 9 vs. 15 cells  |
|                |               | -120 pA: LIII vs. LX                           | <b>0.0013</b>     | ( <i>t</i> ) 3.226 ( <i>df</i> ) 748 | -15.26 $\pm$ 2.5 mV vs. -9.85 $\pm$ 2.1 mV  | 9 vs. 15 cells  |
|                |               | -160 pA: LIII vs. LX                           | 0.6269            | ( <i>t</i> ) 0.486 ( <i>df</i> ) 748 | -18.03 $\pm$ 1.5 mV vs. -17.21 $\pm$ 1.7 mV | 9 vs. 15 cells  |
|                |               | -200 pA: LIII vs. LX                           | 0.1484            | ( <i>t</i> ) 1.447 ( <i>df</i> ) 748 | -19.62 $\pm$ 1.4 mV vs. -22.05 $\pm$ 1.8 mV | 9 vs. 15 cells  |
|                |               | -240 pA: LIII vs. LX                           | 0.1093            | ( <i>t</i> ) 1.603 ( <i>df</i> ) 748 | -21.44 $\pm$ 1.5 mV vs. -24.13 $\pm$ 1.8 mV | 9 vs. 15 cells  |
|                |               | -280 pA: LIII vs. LX                           | <b>0.0106</b>     | ( <i>t</i> ) 2.563 ( <i>df</i> ) 748 | -23.24 $\pm$ 1.6 mV vs. -27.55 $\pm$ 1.4 mV | 9 vs. 15 cells  |
|                |               | -320 pA: LIII vs. LX                           | <b>0.0012</b>     | ( <i>t</i> ) 3.248 ( <i>df</i> ) 748 | -24.58 $\pm$ 1.7 mV vs. -30.03 $\pm$ 1.7 mV | 9 vs. 15 cells  |
|                |               | -280 pA: LIII vs. LX                           | <b>0.0091</b>     | ( <i>t</i> ) 2.617 ( <i>df</i> ) 748 | -21.83 $\pm$ 1.6 mV vs. -26.22 $\pm$ 1.6 mV | 9 vs. 15 cells  |
|                |               | -240 pA: LIII vs. LX                           | <b>0.0327</b>     | ( <i>t</i> ) 2.140 ( <i>df</i> ) 748 | -20.11 $\pm$ 1.4 mV vs. -23.70 $\pm$ 1.4 mV | 9 vs. 15 cells  |
|                |               | -200 pA: LIII vs. LX                           | 0.0795            | ( <i>t</i> ) 1.756 ( <i>df</i> ) 748 | -18.07 $\pm$ 1.3 mV vs. -21.02 $\pm$ 1.4 mV | 9 vs. 15 cells  |
|                |               | -160 pA: LIII vs. LX                           | 0.1504            | ( <i>t</i> ) 1.440 ( <i>df</i> ) 748 | -15.9 $\pm$ 1.3 mV vs. -18.35 $\pm$ 1.4 mV  | 9 vs. 15 cells  |
|                |               | -120 pA: LIII vs. LX                           | 0.2127            | ( <i>t</i> ) 1.247 ( <i>df</i> ) 748 | -13.56 $\pm$ 1.2 mV vs. -15.66 $\pm$ 1.5 mV | 9 vs. 15 cells  |
|                |               | -80 pA: LIII vs. LX                            | 0.4610            | ( <i>t</i> ) 0.738 ( <i>df</i> ) 748 | -11.17 $\pm$ 1.1 mV vs. -12.41 $\pm$ 1.6 mV | 9 vs. 15 cells  |
|                |               | -40 pA: LIII vs. LX                            | 0.2649            | ( <i>t</i> ) 1.116 ( <i>df</i> ) 748 | -7.05 $\pm$ 1.6 mV vs. -8.92 $\pm$ 1.7 mV   | 9 vs. 15 cells  |
|                |               | -0 pA: LIII vs. LX                             | 0.2222            | ( <i>t</i> ) 1.222 ( <i>df</i> ) 748 | -2.79 $\pm$ 0.9 mV vs. -4.84 $\pm$ 1.3 mV   | 9 vs. 15 cells  |
|                |               | -0 pA: LIII vs. LX                             | 0.3454            | ( <i>t</i> ) 0.944 ( <i>df</i> ) 748 | -1.84 $\pm$ 0.6 mV vs. -3.43 $\pm$ 1.3 mV   | 9 vs. 15 cells  |
|                |               | -0 pA: LIII vs. LX                             | 0.5009            | ( <i>t</i> ) 0.673 ( <i>df</i> ) 748 | -1.51 $\pm$ 0.6 mV vs. -2.64 $\pm$ 1.1 mV   | 9 vs. 15 cells  |
|                |               | -0 pA: LIII vs. LX                             | 0.6346            | ( <i>t</i> ) 0.476 ( <i>df</i> ) 748 | -0.98 $\pm$ 0.5 mV vs. -1.78 $\pm$ 1.1 mV   | 9 vs. 15 cells  |
|                |               | -0 pA: LIII vs. LX                             | 0.6565            | ( <i>t</i> ) 0.445 ( <i>df</i> ) 748 | -0.85 $\pm$ 0.4 mV vs. -1.59 $\pm$ 0.9 mV   | 9 vs. 15 cells  |
|                |               | -0 pA: LIII vs. LX                             | 0.7153            | ( <i>t</i> ) 0.365 ( <i>df</i> ) 748 | -0.73 $\pm$ 0.4 mV vs. -1.34 $\pm$ 0.7 mV   | 9 vs. 15 cells  |
|                |               | -0 pA: LIII vs. LX                             | 0.8853            | ( <i>t</i> ) 0.144 ( <i>df</i> ) 748 | -0.62 $\pm$ 0.4 mV vs. -0.86 $\pm$ 0.4 mV   | 9 vs. 15 cells  |
|                |               | -0 pA: LIII vs. LX                             | 0.8547            | ( <i>t</i> ) 0.183 ( <i>df</i> ) 748 | -0.31 $\pm$ 0.2 mV vs. -0.61 $\pm$ 0.3 mV   | 9 vs. 15 cells  |
|                |               | -0 pA: LIII vs. LX                             | 0.9434            | ( <i>t</i> ) 0.071 ( <i>df</i> ) 748 | -0.34 $\pm$ 0.2 mV vs. -0.22 $\pm$ 0.1mV    | 9 vs. 15 cells  |
| Figure 6A2     | Two-way ANOVA | -0 pA: LIII $\downarrow$ vs. LIII $\uparrow$   | 0.7208            | ( <i>t</i> ) 0.358 ( <i>df</i> ) 128 | 0.01 $\pm$ 0.1 mV vs. -0.34 $\pm$ 0.2 mV    | 9 cells         |
|                |               | -0 pA: LIII $\downarrow$ vs. LIII $\uparrow$   | 0.6707            | ( <i>t</i> ) 0.426 ( <i>df</i> ) 128 | 0.11 $\pm$ 0.1 mV vs. -0.31 $\pm$ 0.2 mV    |                 |
|                |               | -0 pA: LIII $\downarrow$ vs. LIII $\uparrow$   | 0.5143            | ( <i>t</i> ) 0.654 ( <i>df</i> ) 128 | 0.02 $\pm$ 0.1 mV vs. -0.62 $\pm$ 0.4 mV    |                 |
|                |               | -0 pA: LIII $\downarrow$ vs. LIII $\uparrow$   | 0.3925            | ( <i>t</i> ) 0.858 ( <i>df</i> ) 128 | 0.11 $\pm$ 0.1 mV vs. -0.73 $\pm$ 0.4 mV    |                 |
|                |               | -0 pA: LIII $\downarrow$ vs. LIII $\uparrow$   | 0.2969            | ( <i>t</i> ) 1.047 ( <i>df</i> ) 128 | 0.18 $\pm$ 0.2 mV vs. -0.85 $\pm$ 0.4 mV    |                 |
|                |               | -0 pA: LIII $\downarrow$ vs. LIII $\uparrow$   | 0.2610            | ( <i>t</i> ) 1.129 ( <i>df</i> ) 128 | 0.13 $\pm$ 0.2 mV vs. -0.98 $\pm$ 0.5 mV    |                 |
|                |               | -0 pA: LIII $\downarrow$ vs. LIII $\uparrow$   | 0.0963            | ( <i>t</i> ) 1.675 ( <i>df</i> ) 128 | 0.14 $\pm$ 0.2 mV vs. -1.51 $\pm$ 0.6 mV    |                 |
|                |               | -0 pA: LIII $\downarrow$ vs. LIII $\uparrow$   | 0.0510            | ( <i>t</i> ) 1.970 ( <i>df</i> ) 128 | 0.09 $\pm$ 0.2 mV vs. -1.84 $\pm$ 0.6 mV    |                 |
|                |               | -0 pA: LIII $\downarrow$ vs. LIII $\uparrow$   | <b>0.0032</b>     | ( <i>t</i> ) 3.003 ( <i>df</i> ) 128 | 0.16 $\pm$ 0.2 mV vs. -2.79 $\pm$ 0.9 mV    |                 |
|                |               | -40 pA: LIII $\downarrow$ vs. LIII $\uparrow$  | <b>&lt;0.0001</b> | ( <i>t</i> ) 6.684 ( <i>df</i> ) 128 | -0.50 $\pm$ 0.2 mV vs. -7.05 $\pm$ 1.6 mV   |                 |
|                |               | -80 pA: LIII $\downarrow$ vs. LIII $\uparrow$  | <b>0.0002</b>     | ( <i>t</i> ) 3.852 ( <i>df</i> ) 128 | -7.40 $\pm$ 2.1 mV vs. -11.17 $\pm$ 1.1 mV  |                 |
|                |               | -120 pA: LIII $\downarrow$ vs. LIII $\uparrow$ | 0.0853            | ( <i>t</i> ) 1.734 ( <i>df</i> ) 128 | -15.26 $\pm$ 2.5 mV vs. -13.56 $\pm$ 1.2 mV |                 |
|                |               | -160 pA: LIII $\downarrow$ vs. LIII $\uparrow$ | <b>0.0342</b>     | ( <i>t</i> ) 2.141 ( <i>df</i> ) 128 | -18.03 $\pm$ 1.5 mV vs. -15.93 $\pm$ 1.3 mV |                 |
|                |               | -200 pA: LIII $\downarrow$ vs. LIII $\uparrow$ | 0.1171            | ( <i>t</i> ) 1.578 ( <i>df</i> ) 128 | -19.62 $\pm$ 1.4 mV vs. -18.07 $\pm$ 1.3 mV |                 |
|                |               | -240 pA: LIII $\downarrow$ vs. LIII $\uparrow$ | 0.1772            | ( <i>t</i> ) 1.357 ( <i>df</i> ) 128 | -21.44 $\pm$ 1.5 mV vs. -20.11 $\pm$ 1.4 mV |                 |
|                |               | -280 pA: LIII $\downarrow$ vs. LIII $\uparrow$ | 0.1512            | ( <i>t</i> ) 1.444 ( <i>df</i> ) 128 | -23.24 $\pm$ 1.6 mV vs. -21.83 $\pm$ 1.6 mV |                 |
|                |               | -320 pA                                        |                   |                                      | -24.58 $\pm$ 1.7 mV                         |                 |
| Figure 6A3     | Two-way ANOVA | -0 pA: LX $\downarrow$ vs. LX $\uparrow$       | 0.8897            | ( <i>t</i> ) 0.139 ( <i>df</i> ) 224 | -0.07 $\pm$ 0.0 mV vs. -0.22 $\pm$ 0.1 mV   | 15 cells        |
|                |               | -0 pA: LX $\downarrow$ vs. LX $\uparrow$       | 0.5891            | ( <i>t</i> ) 0.541 ( <i>df</i> ) 224 | -0.02 $\pm$ 0.0 mV vs. -0.61 $\pm$ 0.3 mV   |                 |
|                |               | -0 pA: LX $\downarrow$ vs. LX $\uparrow$       | 0.4272            | ( <i>t</i> ) 0.800 ( <i>df</i> ) 224 | 0.00 $\pm$ 0.0 mV vs. -0.86 $\pm$ 0.4 mV    |                 |
|                |               | -0 pA: LX $\downarrow$ vs. LX $\uparrow$       | 0.2168            | ( <i>t</i> ) 1.239 ( <i>df</i> ) 224 | 0.01 $\pm$ 0.0 mV vs. -1.34 $\pm$ 0.7 mV    |                 |
|                |               | -0 pA: LX $\downarrow$ vs. LX $\uparrow$       | 0.1562            | ( <i>t</i> ) 1.423 ( <i>df</i> ) 224 | -0.04 $\pm$ 0.0 mV vs. -1.59 $\pm$ 0.9 mV   |                 |
|                |               | -0 pA: LX $\downarrow$ vs. LX $\uparrow$       | 0.1050            | ( <i>t</i> ) 1.628 ( <i>df</i> ) 224 | -0.01 $\pm$ 0.1 mV vs. -1.78 $\pm$ 1.1 mV   |                 |

|            |               |                          |                   |                    |                                     |                |
|------------|---------------|--------------------------|-------------------|--------------------|-------------------------------------|----------------|
|            |               | -0 pA: LX↓ vs. LX↑       | <b>0.0177</b>     | (t) 2.389 (df) 224 | -0.03 ± 0.0 mV vs. -2.64 ± 1.1 mV   |                |
|            |               | -0 pA: LX↓ vs. LX↑       | <b>0.0021</b>     | (t) 3.111 (df) 224 | -0.04 ± 0.1 mV vs. -3.43 ± 1.3 mV   |                |
|            |               | -0 pA: LX↓ vs. LX↑       | <b>&lt;0.0001</b> | (t) 4.378 (df) 224 | -0.07 ± 0.1 mV vs. -4.84 ± 1.3 mV   |                |
|            |               | -40 pA: LX↓ vs. LX↑      | <b>&lt;0.0001</b> | (t) 7.685 (df) 224 | -0.55 ± 0.1 mV vs. -8.92 ± 1.7 mV   |                |
|            |               | -80 pA: LX↓ vs. LX↑      | <b>&lt;0.0001</b> | (t) 7.972 (df) 224 | -3.73 ± 1.3 mV vs. -12.41 ± 1.6 mV  |                |
|            |               | -120 pA: LX↓ vs. LX↑     | <b>&lt;0.0001</b> | (t) 5.336 (df) 224 | -9.85 ± 2.1 mV vs. -15.66 ± 1.5 mV  |                |
|            |               | -160 pA: LX↓ vs. LX↑     | 0.2982            | (t) 1.043 (df) 224 | -17.21 ± 1.7 mV vs. -18.35 ± 1.4 mV |                |
|            |               | -200 pA: LX↓ vs. LX↑     | 0.3470            | (t) 0.942 (df) 224 | -22.05 ± 1.8 mV vs. -21.02 ± 1.4 mV |                |
|            |               | -240 pA: LX↓ vs. LX↑     | 0.6944            | (t) 0.394 (df) 224 | -24.13 ± 1.8 mV vs. -23.70 ± 1.4 mV |                |
|            |               | -280 pA: LX↓ vs. LX↑     | 0.2251            | (t) 1.216 (df) 224 | -27.55 ± 1.4 mV vs. -26.22 ± 1.6 mV |                |
|            |               | -320 pA                  |                   |                    | -30.03 ± 1.7 mV                     |                |
| Figure 6B1 | Two-way ANOVA | -0 pA: LIII vs. LX       | 0.4425            | (t) 0.773 (df) 68  | 42.06 ± 9.0 Hz vs. 42.94 ± 7.0 Hz   | 9 vs. 15 cells |
|            |               | -0 pA: LIII vs. LX       | 0.5014            | (t) 0.676 (df) 68  | 42.49 ± 9.2 Hz vs. 43.12 ± 7.0 Hz   | 9 vs. 15 cells |
|            |               | -0 pA: LIII vs. LX       | 0.4813            | (t) 0.708 (df) 68  | 43.73 ± 9.1 Hz vs. 43.71 ± 7.2 Hz   | 9 vs. 15 cells |
|            |               | -0 pA: LIII vs. LX       | 0.5014            | (t) 0.676 (df) 68  | 44.43 ± 9.5 Hz vs. 43.95 ± 7.1 Hz   | 9 vs. 15 cells |
|            |               | -0 pA: LIII vs. LX       | 0.4425            | (t) 0.773 (df) 68  | 45.45 ± 9.5 Hz vs. 44.39 ± 7.2 Hz   | 9 vs. 15 cells |
|            |               | -0 pA: LIII vs. LX       | 0.4813            | (t) 0.708 (df) 68  | 45.62 ± 9.4 Hz vs. 44.16 ± 7.2 Hz   | 9 vs. 15 cells |
|            |               | -0 pA: LIII vs. LX       | 0.4425            | (t) 0.773 (df) 68  | 45.85 ± 9.4 Hz vs. 44.37 ± 7.1 Hz   | 9 vs. 15 cells |
|            |               | -0 pA: LIII vs. LX       | 0.3377            | (t) 0.708 (df) 68  | 46.17 ± 9.8 Hz vs. 44.48 ± 7.2 Hz   | 9 vs. 15 cells |
|            |               | -0 pA: LIII vs. LX       | 0.4813            | (t) 0.773 (df) 68  | 46.80 ± 9.6 Hz vs. 44.39 ± 7.1 Hz   | 9 vs. 15 cells |
|            |               | -0 pA: LIII vs. LX       | 0.5014            | (t) 0.966 (df) 68  | 47.29 ± 10.0 Hz vs. 44.49 ± 7.1 Hz  | 9 vs. 15 cells |
|            |               | -40 pA: LIII vs. LX      | 0.5642            | (t) 0.708 (df) 68  | 34.41 ± 8.6 Hz vs. 37.28 ± 7.0 Hz   | 9 vs. 15 cells |
|            |               | -80 pA: LIII vs. LX      | 0.8474            | (t) 0.676 (df) 68  | 10.51 ± 5.3 Hz vs. 24.99 ± 6.7 Hz   | 9 vs. 15 cells |
|            |               | -120 pA: LIII vs. LX     | 0.6769            | (t) 0.579 (df) 68  | 2.00 ± 1.7 Hz vs. 13.07 ± 5.7 Hz    | 9 vs. 15 cells |
|            |               | -160 pA: LIII vs. LX     | 0.9744            | (t) 0.193 (df) 68  | 0.00 ± 0.0 Hz vs. 6.59 ± 4.5 Hz     | 9 vs. 15 cells |
|            |               | -200 pA: LIII vs. LX     | >0.9999           | (t) 0.418 (df) 68  | 0.00 ± 0.0 Hz vs. 3.43 ± 3.3 Hz     | 9 vs. 15 cells |
|            |               | -240 pA: LIII vs. LX     | >0.9999           | (t) 0.032 (df) 68  | 0.00 ± 0.0 Hz vs. 2.07 ± 2.1 Hz     | 9 vs. 15 cells |
|            |               | -280 pA: LIII vs. LX     | >0.9999           | (t) 0.000 (df) 68  | 0.00 ± 0.0 Hz vs. 0.15 ± 0.1 Hz     | 9 vs. 15 cells |
|            |               | -320 pA: LIII vs. LX     | >0.9999           | (t) 0.000 (df) 68  | 0.00 ± 0.0 Hz vs. 0.00 ± 0.0 Hz     | 9 vs. 15 cells |
|            |               | -280 pA: LIII vs. LX     | >0.9999           | (t) 0.000 (df) 68  | 0.00 ± 0.0 Hz vs. 0.00 ± 0.0 Hz     | 9 vs. 15 cells |
|            |               | -240 pA: LIII vs. LX     | >0.9999           | (t) 0.000 (df) 68  | 0.00 ± 0.0 Hz vs. 0.00 ± 0.0 Hz     | 9 vs. 15 cells |
|            |               | -200 pA: LIII vs. LX     | >0.9999           | (t) 0.000 (df) 68  | 0.00 ± 0.0 Hz vs. 0.00 ± 0.0 Hz     | 9 vs. 15 cells |
|            |               | -160 pA: LIII vs. LX     | >0.9999           | (t) 0.000 (df) 68  | 0.00 ± 0.0 Hz vs. 0.00 ± 0.0 Hz     | 9 vs. 15 cells |
|            |               | -120 pA: LIII vs. LX     | >0.9999           | (t) 0.000 (df) 68  | 0.00 ± 0.0 Hz vs. 0.00 ± 0.0 Hz     | 9 vs. 15 cells |
|            |               | -80 pA: LIII vs. LX      | >0.9999           | (t) 0.000 (df) 68  | 0.90 ± 0.8 Hz vs. 1.03 ± 0.9 Hz     | 9 vs. 15 cells |
|            |               | -40 pA: LIII vs. LX      | 0.9744            | (t) 0.032 (df) 68  | 13.66 ± 8.1 Hz vs. 4.03 ± 2.2 Hz    | 9 vs. 15 cells |
|            |               | -0 pA: LIII vs. LX       | 0.9234            | (t) 0.097 (df) 68  | 21.86 ± 9.8 Hz vs. 9.69 ± 2.8 Hz    | 9 vs. 15 cells |
|            |               | -0 pA: LIII vs. LX       | 0.8726            | (t) 0.161 (df) 68  | 25.37 ± 9.1 Hz vs. 17.63 ± 4.6 Hz   | 9 vs. 15 cells |
|            |               | -0 pA: LIII vs. LX       | 0.7485            | (t) 0.322 (df) 68  | 27.74 ± 8.9 Hz vs. 22.61 ± 4.8 Hz   | 9 vs. 15 cells |
|            |               | -0 pA: LIII vs. LX       | 0.7729            | (t) 0.290 (df) 68  | 29.40 ± 8.2 Hz vs. 26.58 ± 5.1 Hz   | 9 vs. 15 cells |
|            |               | -0 pA: LIII vs. LX       | 0.5642            | (t) 0.579 (df) 68  | 31.97 ± 8.1 Hz vs. 29.81 ± 5.1 Hz   | 9 vs. 15 cells |
|            |               | -0 pA: LIII vs. LX       | 0.5429            | (t) 0.612 (df) 68  | 33.80 ± 8.3 Hz vs. 31.58 ± 5.2 Hz   | 9 vs. 15 cells |
|            |               | -0 pA: LIII vs. LX       | 0.5429            | (t) 0.612 (df) 68  | 34.96 ± 8.4 Hz vs. 34.45 ± 5.5 Hz   | 9 vs. 15 cells |
|            |               | -0 pA: LIII vs. LX       | 0.5642            | (t) 0.579 (df) 68  | 36.08 ± 8.0 Hz vs. 36.33 ± 5.7 Hz   | 9 vs. 15 cells |
|            |               | -0 pA: LIII vs. LX       | 0.3706            | (t) 0.901 (df) 68  | 38.46 ± 8.6 Hz vs. 38.73 ± 6.1 Hz   | 9 vs. 15 cells |
| Figure 6B2 | Two-way ANOVA | -0 pA: LIII↓ vs. LIII↑   | 0.2434            | (t) 1.172 (df) 128 | 42.49 ± 9.2 Hz vs. 38.46 ± 8.6 Hz   |                |
|            |               | -0 pA: LIII↓ vs. LIII↑   | <b>0.0278</b>     | (t) 2.226 (df) 128 | 43.73 ± 9.1 Hz vs. 36.08 ± 8.0 Hz   |                |
|            |               | -0 pA: LIII↓ vs. LIII↑   | <b>0.0067</b>     | (t) 2.754 (df) 128 | 44.43 ± 9.5 Hz vs. 34.96 ± 8.4 Hz   |                |
|            |               | -0 pA: LIII↓ vs. LIII↑   | <b>0.0009</b>     | (t) 3.389 (df) 128 | 45.45 ± 9.5 Hz vs. 33.80 ± 8.3 Hz   |                |
|            |               | -0 pA: LIII↓ vs. LIII↑   | <b>0.0001</b>     | (t) 3.970 (df) 128 | 45.62 ± 9.4 Hz vs. 31.97 ± 8.1 Hz   |                |
|            |               | -0 pA: LIII↓ vs. LIII↑   | <b>&lt;0.0001</b> | (t) 4.781 (df) 128 | 45.85 ± 9.4 Hz vs. 29.40 ± 8.2 Hz   |                |
|            |               | -0 pA: LIII↓ vs. LIII↑   | <b>&lt;0.0001</b> | (t) 5.360 (df) 128 | 46.17 ± 9.8 Hz vs. 27.74 ± 8.9 Hz   |                |
|            |               | -0 pA: LIII↓ vs. LIII↑   | <b>&lt;0.0001</b> | (t) 6.231 (df) 128 | 46.80 ± 9.6 Hz vs. 25.37 ± 9.1 Hz   |                |
|            |               | -0 pA: LIII↓ vs. LIII↑   | <b>&lt;0.0001</b> | (t) 7.393 (df) 128 | 47.29 ± 10.0 Hz vs. 21.86 ± 9.8 Hz  | 9 cells        |
|            |               | -40 pA: LIII↓ vs. LIII↑  | <b>&lt;0.0001</b> | (t) 6.033 (df) 128 | 34.41 ± 8.6 Hz vs. 13.66 ± 8.1 Hz   |                |
|            |               | -80 pA: LIII↓ vs. LIII↑  | <b>0.0060</b>     | (t) 2.792 (df) 128 | 10.51 ± 5.3 Hz vs. 0.90 ± 0.8 Hz    |                |
|            |               | -120 pA: LIII↓ vs. LIII↑ | 0.5619            | (t) 0.582 (df) 128 | 2.00 ± 1.7 Hz vs. 0.00 ± 0.0 Hz     |                |
|            |               | -160 pA: LIII↓ vs. LIII↑ | >0.9999           | (t) 0.000 (df) 128 | 0.00 ± 0.0 Hz vs. 0.00 ± 0.0 Hz     |                |
|            |               | -200 pA: LIII↓ vs. LIII↑ | >0.9999           | (t) 0.000 (df) 128 | 0.00 ± 0.0 Hz vs. 0.00 ± 0.0 Hz     |                |
|            |               | -240 pA: LIII↓ vs. LIII↑ | >0.9999           | (t) 0.000 (df) 128 | 0.00 ± 0.0 Hz vs. 0.00 ± 0.0 Hz     |                |
|            |               | -280 pA: LIII↓ vs. LIII↑ | >0.9999           | (t) 0.000 (df) 128 | 0.00 ± 0.0 Hz vs. 0.00 ± 0.0 Hz     |                |
| Figure 6B3 | Two-way ANOVA | -320 pA                  |                   |                    | 0.00 ± 0.0 Hz                       |                |
|            |               | -0 pA: LX↓ vs. LX↑       | 0.1967            | (t) 1.295 (df) 224 | 43.12 ± 7.0 Hz vs. 38.73 ± 6.1 Hz   | 15 cells       |
|            |               | -0 pA: LX↓ vs. LX↑       | <b>0.0303</b>     | (t) 2.179 (df) 224 | 43.71 ± 7.2 Hz vs. 36.33 ± 5.7 Hz   |                |

|            |               |                         |                   |                                      |                                   |                |
|------------|---------------|-------------------------|-------------------|--------------------------------------|-----------------------------------|----------------|
| Figure 6C1 | Two-way ANOVA | -0 pA: LX↓ vs. LX↑      | <b>0.0055</b>     | ( <i>t</i> ) 2.804 ( <i>df</i> ) 224 | 43.95 ± 7.1 Hz vs. 34.45 ± 5.5 Hz |                |
|            |               | -0 pA: LX↓ vs. LX↑      | <b>0.0002</b>     | ( <i>t</i> ) 3.783 ( <i>df</i> ) 224 | 44.39 ± 7.2 Hz vs. 31.58 ± 5.2 Hz |                |
|            |               | -0 pA: LX↓ vs. LX↑      | <b>&lt;0.0001</b> | ( <i>t</i> ) 5.190 ( <i>df</i> ) 224 | 44.16 ± 7.2 Hz vs. 26.58 ± 5.1 Hz |                |
|            |               | -0 pA: LX↓ vs. LX↑      | <b>&lt;0.0001</b> | ( <i>t</i> ) 6.423 ( <i>df</i> ) 224 | 44.37 ± 7.1 Hz vs. 22.61 ± 4.8 Hz |                |
|            |               | -0 pA: LX↓ vs. LX↑      | <b>&lt;0.0001</b> | ( <i>t</i> ) 7.925 ( <i>df</i> ) 224 | 44.48 ± 7.2 Hz vs. 17.63 ± 4.6 Hz |                |
|            |               | -0 pA: LX↓ vs. LX↑      | <b>&lt;0.0001</b> | ( <i>t</i> ) 10.24 ( <i>df</i> ) 224 | 44.39 ± 7.1 Hz vs. 9.69 ± 2.8 Hz  |                |
|            |               | -0 pA: LX↓ vs. LX↑      | <b>&lt;0.0001</b> | ( <i>t</i> ) 11.94 ( <i>df</i> ) 224 | 44.49 ± 7.1 Hz vs. 4.03 ± 2.2 Hz  |                |
|            |               | -40 pA: LX↓ vs. LX↑     | <b>&lt;0.0001</b> | ( <i>t</i> ) 10.70 ( <i>df</i> ) 224 | 37.28 ± 7.0 Hz vs. 1.03 ± 0.9 Hz  |                |
|            |               | -80 pA: LX↓ vs. LX↑     | <b>&lt;0.0001</b> | ( <i>t</i> ) 7.379 ( <i>df</i> ) 224 | 24.99 ± 6.7 Hz vs. 0.00 ± 0.0 Hz  |                |
|            |               | -120 pA: LX↓ vs. LX↑    | <b>0.0001</b>     | ( <i>t</i> ) 3.858 ( <i>df</i> ) 224 | 13.07 ± 5.7 Hz vs. 0.00 ± 0.0 Hz  |                |
|            |               | -160 pA: LX↓ vs. LX↑    | 0.0530            | ( <i>t</i> ) 1.946 ( <i>df</i> ) 224 | 6.59 ± 4.5 Hz vs. 0.00 ± 0.0 Hz   |                |
|            |               | -200 pA: LX↓ vs. LX↑    | 0.3129            | ( <i>t</i> ) 1.011 ( <i>df</i> ) 224 | 3.43 ± 3.3 Hz vs. 0.00 ± 0.0 Hz   |                |
|            |               | -240 pA: LX↓ vs. LX↑    | 0.5409            | ( <i>t</i> ) 0.612 ( <i>df</i> ) 224 | 2.07 ± 2.1 Hz vs. 0.00 ± 0.0 Hz   |                |
|            |               | -280 pA: LX↓ vs. LX↑    | 0.9652            | ( <i>t</i> ) 0.044 ( <i>df</i> ) 224 | 0.15 ± 0.1 Hz vs. 0.00 ± 0.0 Hz   |                |
|            |               | -320 pA                 |                   |                                      | 0.00 ± 0.0 Hz                     |                |
|            |               | 0 pA: LIII vs. LX       |                   |                                      | 0.00 ± 0.0 mV vs. 0.00 ± 0.0 mV   | 8 vs. 14 cells |
|            |               | 0 pA: LIII vs. LX       | 0.9931            | ( <i>t</i> ) 0.009 ( <i>df</i> ) 68  | -0.03 ± 0.0 mV vs. 0.00 ± 0.0 mV  | 8 vs. 14 cells |
|            |               | 0 pA: LIII vs. LX       | 0.9942            | ( <i>t</i> ) 0.007 ( <i>df</i> ) 68  | 0.03 ± 0.0 mV vs. 0.01 ± 0.0 mV   | 8 vs. 14 cells |
|            |               | 0 pA: LIII vs. LX       | 0.9919            | ( <i>t</i> ) 0.010 ( <i>df</i> ) 68  | 0.07 ± 0.0 mV vs. 0.03 ± 0.0 mV   | 8 vs. 14 cells |
|            |               | 0 pA: LIII vs. LX       | 0.9977            | ( <i>t</i> ) 0.003 ( <i>df</i> ) 68  | 0.09 ± 0.0 mV vs. 0.03 ± 0.0 mV   | 8 vs. 14 cells |
|            |               | 0 pA: LIII vs. LX       | 0.9816            | ( <i>t</i> ) 0.023 ( <i>df</i> ) 68  | 0.11 ± 0.0 mV vs. 0.05 ± 0.0 mV   | 8 vs. 14 cells |
|            |               | 0 pA: LIII vs. LX       | 0.9885            | ( <i>t</i> ) 0.014 ( <i>df</i> ) 68  | 0.07 ± 0.0 mV vs. 0.08 ± 0.0 mV   | 8 vs. 14 cells |
|            |               | 0 pA: LIII vs. LX       | 0.9850            | ( <i>t</i> ) 0.019 ( <i>df</i> ) 68  | 0.14 ± 0.0 mV vs. 0.03 ± 0.0 mV   | 8 vs. 14 cells |
|            |               | 0 pA: LIII vs. LX       | 0.9850            | ( <i>t</i> ) 0.019 ( <i>df</i> ) 68  | 0.16 ± 0.0 mV vs. 0.07 ± 0.0 mV   | 8 vs. 14 cells |
|            |               | 0 pA: LIII vs. LX       | 0.9954            | ( <i>t</i> ) 0.006 ( <i>df</i> ) 68  | 0.15 ± 0.0 mV vs. 0.10 ± 0.0 mV   | 8 vs. 14 cells |
|            |               | 40 pA: LIII vs. LX      | 0.9425            | ( <i>t</i> ) 0.072 ( <i>df</i> ) 68  | 0.76 ± 0.1 mV vs. 0.30 ± 0.1 mV   | 8 vs. 14 cells |
|            |               | 80 pA: LIII vs. LX      | 0.7488            | ( <i>t</i> ) 0.322 ( <i>df</i> ) 68  | 4.77 ± 0.5 mV vs. 5.95 ± 0.8 mV   | 8 vs. 14 cells |
|            |               | 120 pA: LIII vs. LX     | 0.9977            | ( <i>t</i> ) 0.003 ( <i>df</i> ) 68  | 9.52 ± 1.9 mV vs. 10.19 ± 0.9 mV  | 8 vs. 14 cells |
|            |               | 160 pA: LIII vs. LX     | 0.3919            | ( <i>t</i> ) 0.862 ( <i>df</i> ) 68  | 13.27 ± 1.8 mV vs. 14.14 ± 0.9 mV | 8 vs. 14 cells |
|            |               | 200 pA: LIII vs. LX     | 0.7002            | ( <i>t</i> ) 0.387 ( <i>df</i> ) 68  | 16.07 ± 1.5 mV vs. 17.33 ± 1.0 mV | 8 vs. 14 cells |
|            |               | 240 pA: LIII vs. LX     | 0.5403            | ( <i>t</i> ) 0.615 ( <i>df</i> ) 68  | 17.89 ± 1.3 mV vs. 18.42 ± 1.0 mV | 8 vs. 14 cells |
|            |               | 280 pA: LIII vs. LX     | 0.4689            | ( <i>t</i> ) 0.728 ( <i>df</i> ) 68  | 19.04 ± 1.4 mV vs. 19.72 ± 1.0 mV | 8 vs. 14 cells |
|            |               | 320 pA: LIII vs. LX     | 0.5375            | ( <i>t</i> ) 0.620 ( <i>df</i> ) 68  | 19.91 ± 1.5 mV vs. 20.34 ± 1.1 mV | 8 vs. 14 cells |
|            |               | 280 pA: LIII vs. LX     | 0.4760            | ( <i>t</i> ) 0.719 ( <i>df</i> ) 68  | 19.20 ± 1.4 mV vs. 19.91 ± 1.1 mV | 8 vs. 14 cells |
|            |               | 240 pA: LIII vs. LX     | 0.5318            | ( <i>t</i> ) 0.629 ( <i>df</i> ) 68  | 18.17 ± 1.4 mV vs. 18.95 ± 1.1 mV | 8 vs. 14 cells |
|            |               | 200 pA: LIII vs. LX     | 0.6099            | ( <i>t</i> ) 0.513 ( <i>df</i> ) 68  | 17.07 ± 1.4 mV vs. 18.08 ± 1.1 mV | 8 vs. 14 cells |
|            |               | 160 pA: LIII vs. LX     | 0.8694            | ( <i>t</i> ) 0.165 ( <i>df</i> ) 68  | 13.59 ± 2.3 mV vs. 16.85 ± 1.0 mV | 8 vs. 14 cells |
|            |               | 120 pA: LIII vs. LX     | 0.9104            | ( <i>t</i> ) 0.113 ( <i>df</i> ) 68  | 10.68 ± 2.4 mV vs. 14.86 ± 1.4 mV | 8 vs. 14 cells |
|            |               | 80 pA: LIII vs. LX      | 0.4813            | ( <i>t</i> ) 0.708 ( <i>df</i> ) 68  | 5.94 ± 2.8 mV vs. 12.04 ± 1.8 mV  | 8 vs. 14 cells |
|            |               | 40 pA: LIII vs. LX      | <b>0.0452</b>     | ( <i>t</i> ) 2.040 ( <i>df</i> ) 68  | 2.27 ± 2.4 mV vs. 9.04 ± 2.1 mV   | 8 vs. 14 cells |
|            |               | 0 pA: LIII vs. LX       | <b>0.0319</b>     | ( <i>t</i> ) 2.191 ( <i>df</i> ) 68  | -1.71 ± 1.0 mV vs. -1.52 ± 0.9 mV | 8 vs. 14 cells |
|            |               | 0 pA: LIII vs. LX       | 0.7379            | ( <i>t</i> ) 0.336 ( <i>df</i> ) 68  | -0.41 ± 0.1 mV vs. -0.78 ± 0.4 mV | 8 vs. 14 cells |
|            |               | 0 pA: LIII vs. LX       | 0.7863            | ( <i>t</i> ) 0.272 ( <i>df</i> ) 68  | -0.35 ± 0.1 mV vs. -0.56 ± 0.1 mV | 8 vs. 14 cells |
|            |               | 0 pA: LIII vs. LX       | 0.9908            | ( <i>t</i> ) 0.116 ( <i>df</i> ) 68  | -0.33 ± 0.1 mV vs. -0.45 ± 0.1 mV | 8 vs. 14 cells |
|            |               | 0 pA: LIII vs. LX       | 0.9977            | ( <i>t</i> ) 0.003 ( <i>df</i> ) 68  | -0.24 ± 0.1 mV vs. -0.35 ± 0.1 mV | 8 vs. 14 cells |
|            |               | 0 pA: LIII vs. LX       | 0.9965            | ( <i>t</i> ) 0.004 ( <i>df</i> ) 68  | -0.22 ± 0.1 mV vs. -0.27 ± 0.1 mV | 8 vs. 14 cells |
|            |               | 0 pA: LIII vs. LX       | 0.9896            | ( <i>t</i> ) 0.013 ( <i>df</i> ) 68  | -0.15 ± 0.1 mV vs. -0.26 ± 0.1 mV | 8 vs. 14 cells |
|            |               | 0 pA: LIII vs. LX       | 0.9862            | ( <i>t</i> ) 0.017 ( <i>df</i> ) 68  | -0.13 ± 0.0 mV vs. -0.25 ± 0.1 mV | 8 vs. 14 cells |
|            |               | 0 pA: LIII vs. LX       | 0.9655            | ( <i>t</i> ) 0.043 ( <i>df</i> ) 68  | -0.10 ± 0.0 mV vs. -0.22 ± 0.1 mV | 8 vs. 14 cells |
| Figure 6C2 | Two-way ANOVA | 0 pA: LIII↓ vs. LIII↑   | 0.9454            | ( <i>t</i> ) 0.069 ( <i>df</i> ) 112 | -0.03 ± 0.0 mV vs. -0.10 ± 0.0 mV |                |
|            |               | 0 pA: LIII↓ vs. LIII↑   | 0.8752            | ( <i>t</i> ) 0.157 ( <i>df</i> ) 112 | 0.03 ± 0.0 mV vs. -0.13 ± 0.0 mV  |                |
|            |               | 0 pA: LIII↓ vs. LIII↑   | 0.8284            | ( <i>t</i> ) 0.217 ( <i>df</i> ) 112 | 0.07 ± 0.0 mV vs. -0.15 ± 0.1 mV  |                |
|            |               | 0 pA: LIII↓ vs. LIII↑   | 0.7564            | ( <i>t</i> ) 0.311 ( <i>df</i> ) 112 | 0.09 ± 0.0 mV vs. -0.22 ± 0.1 mV  |                |
|            |               | 0 pA: LIII↓ vs. LIII↑   | 0.7272            | ( <i>t</i> ) 0.350 ( <i>df</i> ) 112 | 0.11 ± 0.0 mV vs. -0.24 ± 0.1 mV  |                |
|            |               | 0 pA: LIII↓ vs. LIII↑   | 0.6978            | ( <i>t</i> ) 0.393 ( <i>df</i> ) 112 | 0.07 ± 0.0 mV vs. -0.33 ± 0.1 mV  |                |
|            |               | 0 pA: LIII↓ vs. LIII↑   | 0.6254            | ( <i>t</i> ) 0.490 ( <i>df</i> ) 112 | 0.14 ± 0.0 mV vs. -0.35 ± 0.1 mV  |                |
|            |               | 0 pA: LIII↓ vs. LIII↑   | 0.5676            | ( <i>t</i> ) 0.573 ( <i>df</i> ) 112 | 0.16 ± 0.0 mV vs. -0.41 ± 0.1 mV  | 8 cells        |
|            |               | 0 pA: LIII↓ vs. LIII↑   | 0.0657            | ( <i>t</i> ) 1.858 ( <i>df</i> ) 112 | 0.15 ± 0.0 mV vs. -1.71 ± 1.0 mV  |                |
|            |               | 40 pA: LIII↓ vs. LIII↑  | 0.1329            | ( <i>t</i> ) 1.514 ( <i>df</i> ) 112 | 0.76 ± 0.1 mV vs. 2.27 ± 2.4 mV   |                |
|            |               | 80 pA: LIII↓ vs. LIII↑  | 0.2444            | ( <i>t</i> ) 1.170 ( <i>df</i> ) 112 | 4.77 ± 0.5 mV vs. 5.94 ± 2.8 mV   |                |
|            |               | 120 pA: LIII↓ vs. LIII↑ | 0.2499            | ( <i>t</i> ) 1.157 ( <i>df</i> ) 112 | 9.52 ± 1.9 mV vs. 10.68 ± 2.4 mV  |                |
|            |               | 160 pA: LIII↓ vs. LIII↑ | 0.7517            | ( <i>t</i> ) 0.317 ( <i>df</i> ) 112 | 13.27 ± 1.8 mV vs. 13.59 ± 2.3 mV |                |
|            |               | 200 pA: LIII↓ vs. LIII↑ | 0.3205            | ( <i>t</i> ) 0.998 ( <i>df</i> ) 112 | 16.07 ± 1.5 mV vs. 17.07 ± 1.4 mV |                |
|            |               | 240 pA: LIII↓ vs. LIII↑ | 0.7754            | ( <i>t</i> ) 0.286 ( <i>df</i> ) 112 | 17.89 ± 1.3 mV vs. 18.17 ± 1.4 mV |                |



|            |               |                          |                   |                    |                                    |                |
|------------|---------------|--------------------------|-------------------|--------------------|------------------------------------|----------------|
| Figure 6C3 | Two-way ANOVA | -280 pA: LIII↓ vs. LIII↑ | 0.5762            | (t) 0.156 (df) 112 | 19.04 ± 1.4 mV vs. 19.20 ± 1.4 mV  | 14 cells       |
|            |               | -320 pA                  |                   |                    | 19.81 ± 1.5 mV                     |                |
|            |               | 0 pA: LX↓ vs. LX↑        | 0.8004            | (t) 0.253 (df) 208 | 0.00 ± 0.0 mV vs. -0.22 ± 0.1 mV   |                |
|            |               | 0 pA: LX↓ vs. LX↑        | 0.7591            | (t) 0.307 (df) 208 | 0.01 ± 0.0 mV vs. -0.25 ± 0.1 mV   |                |
|            |               | 0 pA: LX↓ vs. LX↑        | 0.7415            | (t) 0.330 (df) 208 | 0.03 ± 0.0 mV vs. -0.26 ± 0.1 mV   |                |
|            |               | 0 pA: LX↓ vs. LX↑        | 0.7334            | (t) 0.341 (df) 208 | 0.03 ± 0.0 mV vs. -0.27 ± 0.1 mV   |                |
|            |               | 0 pA: LX↓ vs. LX↑        | 0.6449            | (t) 0.462 (df) 208 | 0.05 ± 0.0 mV vs. -0.35 ± 0.1 mV   |                |
|            |               | 0 pA: LX↓ vs. LX↑        | 0.8387            | (t) 0.616 (df) 208 | 0.08 ± 0.0 mV vs. -0.45 ± 0.1 mV   |                |
|            |               | 0 pA: LX↓ vs. LX↑        | 0.4937            | (t) 0.686 (df) 208 | 0.03 ± 0.0 mV vs. -0.56 ± 0.1 mV   |                |
|            |               | 0 pA: LX↓ vs. LX↑        | 0.3240            | (t) 0.989 (df) 208 | 0.07 ± 0.0 mV vs. -0.78 ± 0.4 mV   |                |
|            |               | 0 pA: LX↓ vs. LX↑        | 0.0613            | (t) 1.882 (df) 208 | 0.10 ± 0.0 mV vs. -1.52 ± 0.9 mV   |                |
|            |               | 40 pA: LX↓ vs. LX↑       | <b>&lt;0.0001</b> | (t) 9.802 (df) 208 | 0.60 ± 0.1 mV vs. 9.04 ± 2.1 mV    |                |
|            |               | 80 pA: LX↓ vs. LX↑       | <b>&lt;0.0001</b> | (t) 7.077 (df) 208 | 5.95 ± 0.8 mV vs. 12.04 ± 1.8 mV   |                |
|            |               | 120 pA: LX↓ vs. LX↑      | <b>&lt;0.0001</b> | (t) 5.431 (df) 208 | 10.19 ± 0.9 mV vs. 14.86 ± 1.4 mV  |                |
|            |               | 160 pA: LX↓ vs. LX↑      | <b>0.0049</b>     | (t) 3.145 (df) 208 | 14.14 ± 0.9 mV vs. 16.85 ± 1.0 mV  |                |
|            |               | 200 pA: LX↓ vs. LX↑      | 0.3886            | (t) 0.864 (df) 208 | 17.33 ± 1.0 mV vs. 18.08 ± 1.1 mV  |                |
|            |               | 240 pA: LX↓ vs. LX↑      | 0.5354            | (t) 0.621 (df) 208 | 18.42 ± 1.0 mV vs. 18.95 ± 1.1 mV  |                |
|            |               | 280 pA: LX↓ vs. LX↑      | 0.8203            | (t) 0.227 (df) 208 | 19.72 ± 1.0 mV vs. 19.91 ± 1.1 mV  |                |
|            |               | 320 pA                   |                   |                    | 20.34 ± 1.1 mV                     |                |
| Figure 6D1 | Two-way ANOVA | 0 pA: LIII vs. LX        | >0.9999           | (t) 0.000 (df) 680 | 0.00 ± 0.0 Hz vs. 0.00 ± 0.0 Hz    | 8 vs. 14 cells |
|            |               | 0 pA: LIII vs. LX        | >0.9999           | (t) 0.000 (df) 680 | 0.00 ± 0.0 Hz vs. 0.00 ± 0.0 Hz    | 8 vs. 14 cells |
|            |               | 0 pA: LIII vs. LX        | >0.9999           | (t) 0.000 (df) 680 | 0.00 ± 0.0 Hz vs. 0.00 ± 0.0 Hz    | 8 vs. 14 cells |
|            |               | 0 pA: LIII vs. LX        | >0.9999           | (t) 0.000 (df) 680 | 0.00 ± 0.0 Hz vs. 0.00 ± 0.0 Hz    | 8 vs. 14 cells |
|            |               | 0 pA: LIII vs. LX        | >0.9999           | (t) 0.000 (df) 680 | 0.00 ± 0.0 Hz vs. 0.00 ± 0.0 Hz    | 8 vs. 14 cells |
|            |               | 0 pA: LIII vs. LX        | >0.9999           | (t) 0.000 (df) 680 | 0.00 ± 0.0 Hz vs. 0.00 ± 0.0 Hz    | 8 vs. 14 cells |
|            |               | 0 pA: LIII vs. LX        | >0.9999           | (t) 0.000 (df) 680 | 0.00 ± 0.0 Hz vs. 0.00 ± 0.0 Hz    | 8 vs. 14 cells |
|            |               | 0 pA: LIII vs. LX        | >0.9999           | (t) 0.000 (df) 680 | 0.00 ± 0.0 Hz vs. 0.00 ± 0.0 Hz    | 8 vs. 14 cells |
|            |               | 0 pA: LIII vs. LX        | >0.9999           | (t) 0.000 (df) 680 | 0.00 ± 0.0 Hz vs. 0.00 ± 0.0 Hz    | 8 vs. 14 cells |
|            |               | 0 pA: LIII vs. LX        | >0.9999           | (t) 0.000 (df) 680 | 0.00 ± 0.0 Hz vs. 0.00 ± 0.0 Hz    | 8 vs. 14 cells |
|            |               | 40 pA: LIII vs. LX       | >0.9999           | (t) 0.000 (df) 680 | 0.00 ± 0.0 Hz vs. 0.00 ± 0.0 Hz    | 8 vs. 14 cells |
|            |               | 80 pA: LIII vs. LX       | 0.9056            | (t) 0.119 (df) 680 | 0.94 ± 0.9 Hz vs. 1.82 ± 1.4 Hz    | 8 vs. 14 cells |
|            |               | 120 pA: LIII vs. LX      | 0.7201            | (t) 0.358 (df) 680 | 14.56 ± 7.2 Hz vs. 11.89 ± 4.0 Hz  | 8 vs. 14 cells |
|            |               | 160 pA: LIII vs. LX      | 0.2843            | (t) 1.072 (df) 680 | 32.69 ± 11.5 Hz vs. 24.71 ± 5.8 Hz | 8 vs. 14 cells |
|            |               | 200 pA: LIII vs. LX      | 0.1556            | (t) 1.422 (df) 680 | 50.38 ± 13.4 Hz vs. 39.79 ± 6.8 Hz | 8 vs. 14 cells |
|            |               | 240 pA: LIII vs. LX      | 0.2014            | (t) 1.279 (df) 680 | 66.31 ± 14.2 Hz vs. 56.79 ± 6.4 Hz | 8 vs. 14 cells |
|            |               | 280 pA: LIII vs. LX      | 0.0787            | (t) 1.761 (df) 680 | 81.25 ± 15.5 Hz vs. 68.13 ± 6.2 Hz | 8 vs. 14 cells |
|            |               | 320 pA: LIII vs. LX      | <b>0.0355</b>     | (t) 2.107 (df) 680 | 91.00 ± 16.4 Hz vs. 75.30 ± 5.9 Hz | 8 vs. 14 cells |
|            |               | 280 pA: LIII vs. LX      | 0.0969            | (t) 1.663 (df) 680 | 81.44 ± 15.5 Hz vs. 69.05 ± 5.9 Hz | 8 vs. 14 cells |
|            |               | 240 pA: LIII vs. LX      | 0.3302            | (t) 0.975 (df) 680 | 67.81 ± 14.5 Hz vs. 60.55 ± 5.5 Hz | 8 vs. 14 cells |
|            |               | 200 pA: LIII vs. LX      | 0.8163            | (t) 0.233 (df) 680 | 53.13 ± 14.2 Hz vs. 51.39 ± 4.3 Hz | 8 vs. 14 cells |
|            |               | 160 pA: LIII vs. LX      | 0.5443            | (t) 0.607 (df) 680 | 37.00 ± 12.6 Hz vs. 41.52 ± 2.3 Hz | 8 vs. 14 cells |
|            |               | 120 pA: LIII vs. LX      | 0.2935            | (t) 1.051 (df) 680 | 22.75 ± 10.6 Hz vs. 30.58 ± 0.4 Hz | 8 vs. 14 cells |
|            |               | 80 pA: LIII vs. LX       | 0.2056            | (t) 1.267 (df) 680 | 10.75 ± 7.4 Hz vs. 20.19 ± 0.2 Hz  | 8 vs. 14 cells |
|            |               | 40 pA: LIII vs. LX       | 0.4561            | (t) 0.746 (df) 680 | 2.38 ± 2.4 Hz vs. 7.93 ± 0.0 Hz    | 8 vs. 14 cells |
|            |               | 0 pA: LIII vs. LX        | 0.9236            | (t) 0.096 (df) 680 | 0.00 ± 0.0 Hz vs. 0.71 ± 0.0 Hz    | 8 vs. 14 cells |
|            |               | 0 pA: LIII vs. LX        | 0.9771            | (t) 0.029 (df) 680 | 0.00 ± 0.0 Hz vs. 0.21 ± 0.0 Hz    | 8 vs. 14 cells |
|            |               | 0 pA: LIII vs. LX        | >0.9999           | (t) 0.000 (df) 680 | 0.00 ± 0.0 Hz vs. 0.00 ± 0.0 Hz    | 8 vs. 14 cells |
|            |               | 0 pA: LIII vs. LX        | >0.9999           | (t) 0.000 (df) 680 | 0.00 ± 0.0 Hz vs. 0.00 ± 0.0 Hz    | 8 vs. 14 cells |
|            |               | 0 pA: LIII vs. LX        | >0.9999           | (t) 0.000 (df) 680 | 0.00 ± 0.0 Hz vs. 0.00 ± 0.0 Hz    | 8 vs. 14 cells |
|            |               | 0 pA: LIII vs. LX        | >0.9999           | (t) 0.000 (df) 680 | 0.00 ± 0.0 Hz vs. 0.00 ± 0.0 Hz    | 8 vs. 14 cells |
|            |               | 0 pA: LIII vs. LX        | >0.9999           | (t) 0.000 (df) 680 | 0.00 ± 0.0 Hz vs. 0.00 ± 0.0 Hz    | 8 vs. 14 cells |
|            |               | 0 pA: LIII vs. LX        | >0.9999           | (t) 0.000 (df) 680 | 0.00 ± 0.0 Hz vs. 0.00 ± 0.0 Hz    | 8 vs. 14 cells |
|            |               | 0 pA: LIII vs. LX        | >0.9999           | (t) 0.000 (df) 680 | 0.00 ± 0.0 Hz vs. 0.00 ± 0.0 Hz    | 8 vs. 14 cells |
| Figure 6D2 | Two-way ANOVA | 0 pA: LIII↓ vs. LIII↑    | >0.9999           | (t) 0.000 (df) 112 | 0.00 ± 0.0 Hz vs. 0.00 ± 0.0 Hz    | 8 cells        |
|            |               | 0 pA: LIII↓ vs. LIII↑    | >0.9999           | (t) 0.000 (df) 112 | 0.00 ± 0.0 Hz vs. 0.00 ± 0.0 Hz    |                |
|            |               | 0 pA: LIII↓ vs. LIII↑    | >0.9999           | (t) 0.000 (df) 112 | 0.00 ± 0.0 Hz vs. 0.00 ± 0.0 Hz    |                |
|            |               | 0 pA: LIII↓ vs. LIII↑    | >0.9999           | (t) 0.000 (df) 112 | 0.00 ± 0.0 Hz vs. 0.00 ± 0.0 Hz    |                |
|            |               | 0 pA: LIII↓ vs. LIII↑    | >0.9999           | (t) 0.000 (df) 112 | 0.00 ± 0.0 Hz vs. 0.00 ± 0.0 Hz    |                |
|            |               | 0 pA: LIII↓ vs. LIII↑    | >0.9999           | (t) 0.000 (df) 112 | 0.00 ± 0.0 Hz vs. 0.00 ± 0.0 Hz    |                |
|            |               | 0 pA: LIII↓ vs. LIII↑    | >0.9999           | (t) 0.000 (df) 112 | 0.00 ± 0.0 Hz vs. 0.00 ± 0.0 Hz    |                |
|            |               | 0 pA: LIII↓ vs. LIII↑    | >0.9999           | (t) 0.000 (df) 112 | 0.00 ± 0.0 Hz vs. 0.00 ± 0.0 Hz    |                |
|            |               | 0 pA: LIII↓ vs. LIII↑    | >0.9999           | (t) 0.000 (df) 112 | 0.00 ± 0.0 Hz vs. 0.00 ± 0.0 Hz    |                |
|            |               | 40 pA: LIII↓ vs. LIII↑   | 0.3496            | (t) 0.939 (df) 112 | 0.00 ± 0.0 Hz vs. 2.38 ± 2.4 Hz    |                |
|            |               | 80 pA: LIII↓ vs. LIII↑   | <b>0.0002</b>     | (t) 3.881 (df) 112 | 0.94 ± 0.9 Hz vs. 10.75 ± 7.4 Hz   |                |

|            |               |                         |                   |                    |                                     |          |
|------------|---------------|-------------------------|-------------------|--------------------|-------------------------------------|----------|
| Figure 6D3 | Two-way ANOVA | 120 pA: LIII↓ vs. LIII↑ | <b>0.0016</b>     | (t) 3.238 (df) 112 | 14.56 ± 7.2 Hz vs. 22.75 ± 10.6 Hz  | 14 cells |
|            |               | 160 pA: LIII↓ vs. LIII↑ | 0.0909            | (t) 1.705 (df) 112 | 32.69 ± 11.5 Hz vs. 37.00 ± 12.6 Hz |          |
|            |               | 200 pA: LIII↓ vs. LIII↑ | 0.2791            | (t) 1.088 (df) 112 | 50.38 ± 13.4 Hz vs. 53.13 ± 14.2 Hz |          |
|            |               | 240 pA: LIII↓ vs. LIII↑ | 0.5542            | (t) 0.593 (df) 112 | 66.31 ± 14.2 Hz vs. 67.81 ± 14.5 Hz |          |
|            |               | 280 pA: LIII↓ vs. LIII↑ | 0.9410            | (t) 0.074 (df) 112 | 81.25 ± 15.5 Hz vs. 81.44 ± 15.5 Hz |          |
|            |               | 320 pA                  |                   |                    | 91.00 ± 16.4 Hz                     |          |
|            |               | 0 pA: LX↓ vs. LX↑       | >0.9999           | (t) 0.000 (df) 208 | 0.00 ± 0.0 Hz vs. 0.00 ± 0.0 Hz     |          |
|            |               | 0 pA: LX↓ vs. LX↑       | >0.9999           | (t) 0.000 (df) 208 | 0.00 ± 0.0 Hz vs. 0.00 ± 0.0 Hz     |          |
|            |               | 0 pA: LX↓ vs. LX↑       | >0.9999           | (t) 0.000 (df) 208 | 0.00 ± 0.0 Hz vs. 0.00 ± 0.0 Hz     |          |
|            |               | 0 pA: LX↓ vs. LX↑       | >0.9999           | (t) 0.000 (df) 208 | 0.00 ± 0.0 Hz vs. 0.00 ± 0.0 Hz     |          |
|            |               | 0 pA: LX↓ vs. LX↑       | >0.9999           | (t) 0.000 (df) 208 | 0.00 ± 0.0 Hz vs. 0.00 ± 0.0 Hz     |          |
|            |               | 0 pA: LX↓ vs. LX↑       | >0.9999           | (t) 0.000 (df) 208 | 0.00 ± 0.0 Hz vs. 0.00 ± 0.0 Hz     |          |
|            |               | 0 pA: LX↓ vs. LX↑       | >0.9999           | (t) 0.000 (df) 208 | 0.00 ± 0.0 Hz vs. 0.00 ± 0.0 Hz     |          |
|            |               | 0 pA: LX↓ vs. LX↑       | 0.9341            | (t) 0.083 (df) 208 | 0.00 ± 0.0 Hz vs. 0.21 ± 0.2 Hz     |          |
|            |               | 0 pA: LX↓ vs. LX↑       | 0.7828            | (t) 0.276 (df) 208 | 0.00 ± 0.0 Hz vs. 0.71 ± 0.4 Hz     |          |
|            |               | 40 pA: LX↓ vs. LX↑      | <b>0.0025</b>     | (t) 3.064 (df) 208 | 0.00 ± 0.0 Hz vs. 7.93 ± 2.3 Hz     |          |
|            |               | 80 pA: LX↓ vs. LX↑      | <b>&lt;0.0001</b> | (t) 7.098 (df) 208 | 1.82 ± 1.4 Hz vs. 20.19 ± 4.3 Hz    |          |
|            |               | 120 pA: LX↓ vs. LX↑     | <b>&lt;0.0001</b> | (t) 7.222 (df) 208 | 11.89 ± 4.0 Hz vs. 30.58 ± 5.5 Hz   |          |
|            |               | 160 pA: LX↓ vs. LX↑     | <b>&lt;0.0001</b> | (t) 6.498 (df) 208 | 24.71 ± 5.8 Hz vs. 41.52 ± 5.9 Hz   |          |
|            |               | 200 pA: LX↓ vs. LX↑     | <b>&lt;0.0001</b> | (t) 4.486 (df) 208 | 39.79 ± 6.8 Hz vs. 51.39 ± 5.9 Hz   |          |
|            |               | 240 pA: LX↓ vs. LX↑     | 0.1468            | (t) 1.456 (df) 208 | 56.79 ± 6.0 Hz vs. 60.55 ± 6.2 Hz   |          |
|            |               | 280 pA: LX↓ vs. LX↑     | 0.7225            | (t) 0.356 (df) 208 | 68.13 ± 6.3 Hz vs. 69.05 ± 6.4 Hz   |          |
|            |               | 320 pA                  |                   |                    | 75.30 ± 6.8 Hz                      |          |

**Table S7.** Statistical data for *in vitro* whole cell patch electrophysiology in the adult mouse ( $P > 30$ ), tail-current analysis. Data for *in vitro* extracellular recordings in the adult mouse ( $P > 30$ ), for propofol effect analysis, and whole cell for action potential properties with propofol. Descriptive values are represented as  $\pm$  SEM. Abbreviations: LIII = Lobule III, LX = Lobule X, *df* = degrees of freedom, pA = picoampere, Hz = hertz, mV = millivolt, Vm = membrane voltage,  $\Omega$  = Ohm, msec = milliseconds, aCSF = artificial cerebral spinal fluid aCSF+P = aCSF with propofol added, aCSF+PC = aCSF with propofol and CGP added, aCSF+Z = aCSF with propofol and zatebradine added.

| Related Figure | Test Applied           | Group                | p-Value           | Population-Value            | Descriptive Values                      | Population Size |
|----------------|------------------------|----------------------|-------------------|-----------------------------|-----------------------------------------|-----------------|
| Figure 7B1     | Mixed-effects analysis | Time x Column factor | <b>&lt;0.0001</b> | F(16, 416)                  |                                         |                 |
|                |                        | -130 pA: LIII vs. LX | <b>&lt;0.0001</b> | (t) 4.324 ( <i>df</i> ) 445 | 193.9 $\pm$ 12 pA vs. 144.4 $\pm$ 11 pA | 16 vs. 15 cells |
|                |                        | -125 pA: LIII vs. LX | <b>&lt;0.0001</b> | (t) 4.773 ( <i>df</i> ) 445 | 194.7 $\pm$ 13 pA vs. 136.8 $\pm$ 11 pA | 12 vs. 13 cells |
|                |                        | -120 pA: LIII vs. LX | <b>&lt;0.0001</b> | (t) 4.843 ( <i>df</i> ) 445 | 187.4 $\pm$ 14 pA vs. 131.9 $\pm$ 9 pA  | 16 vs. 15 cells |
|                |                        | -115 pA: LIII vs. LX | <b>&lt;0.0001</b> | (t) 5.110 ( <i>df</i> ) 445 | 187.3 $\pm$ 11 pA vs. 125.3 $\pm$ 11 pA | 12 vs. 13 cells |
|                |                        | -110 pA: LIII vs. LX | <b>&lt;0.0001</b> | (t) 5.110 ( <i>df</i> ) 445 | 175.9 $\pm$ 10 pA vs. 117.3 $\pm$ 9 pA  | 16 vs. 15 cells |
|                |                        | -105 pA: LIII vs. LX | <b>&lt;0.0001</b> | (t) 4.684 ( <i>df</i> ) 445 | 172.1 $\pm$ 9 pA vs. 115.2 $\pm$ 9 pA   | 12 vs. 13 cells |
|                |                        | -100 pA: LIII vs. LX | <b>&lt;0.0001</b> | (t) 4.797 ( <i>df</i> ) 445 | 160.6 $\pm$ 9 pA vs. 105.6 $\pm$ 8 pA   | 16 vs. 15 cells |
|                |                        | -95 pA: LIII vs. LX  | <b>&lt;0.0001</b> | (t) 4.914 ( <i>df</i> ) 445 | 158.8 $\pm$ 7 pA vs. 99.1 $\pm$ 9 pA    | 12 vs. 13 cells |
|                |                        | -90 pA: LIII vs. LX  | <b>&lt;0.0001</b> | (t) 4.278 ( <i>df</i> ) 445 | 139.1 $\pm$ 8 pA vs. 90.0 $\pm$ 7 pA    | 16 vs. 15 cells |
|                |                        | -85 pA: LIII vs. LX  | <b>0.0004</b>     | (t) 3.596 ( <i>df</i> ) 445 | 123.8 $\pm$ 6 pA vs. 79.9 $\pm$ 8 pA    | 12 vs. 13 cells |
|                |                        | -80 pA: LIII vs. LX  | <b>0.0011</b>     | (t) 3.285 ( <i>df</i> ) 445 | 105.1 $\pm$ 7 pA vs. 67.4 $\pm$ 7 pA    | 16 vs. 15 cells |
|                |                        | -75 pA: LIII vs. LX  | <b>0.0048</b>     | (t) 2.836 ( <i>df</i> ) 445 | 89.5 $\pm$ 8 pA vs. 54.7 $\pm$ 6 pA     | 12 vs. 13 cells |
|                |                        | -70 pA: LIII vs. LX  | <b>0.0220</b>     | (t) 2.299 ( <i>df</i> ) 445 | 66.5 $\pm$ 6 pA vs. 40.2 $\pm$ 5 pA     | 16 vs. 15 cells |
|                |                        | -65 pA: LIII vs. LX  | 0.1641            | (t) 1.394 ( <i>df</i> ) 445 | 45.5 $\pm$ 7 pA vs. 28.0 $\pm$ 3 pA     | 12 vs. 13 cells |
|                |                        | -60 pA: LIII vs. LX  | 0.2438            | (t) 1.167 ( <i>df</i> ) 445 | 30.6 $\pm$ 3 pA vs. 17.2 $\pm$ 2 pA     | 16 vs. 15 cells |
|                |                        | -55 pA: LIII vs. LX  | 0.8729            | (t) 0.160 ( <i>df</i> ) 445 | 14.1 $\pm$ 2 pA vs. 11.3 $\pm$ 2 pA     | 12 vs. 13 cells |
|                |                        | -50 pA: LIII vs. LX  | >0.9999           | (t) 0.000 ( <i>df</i> ) 445 | 0.0 $\pm$ 0 pA vs. 0.0 $\pm$ 0 pA       | 16 vs. 15 cells |
| Figure 7B2     | Mixed-effects analysis | Time x Column factor | <b>&lt;0.0001</b> | F(16, 422)                  |                                         |                 |
|                |                        | -130 pA: LIII vs. LX | <b>0.0013</b>     | (t) 3.241 ( <i>df</i> ) 451 | 123.5 $\pm$ 12 pA vs. 93.5 $\pm$ 9 pA   | 16 vs. 15 cells |
|                |                        | -125 pA: LIII vs. LX | <b>0.0018</b>     | (t) 3.144 ( <i>df</i> ) 451 | 115.1 $\pm$ 13 pA vs. 90.9 $\pm$ 8 pA   | 12 vs. 13 cells |
|                |                        | -120 pA: LIII vs. LX | <b>0.0004</b>     | (t) 3.544 ( <i>df</i> ) 451 | 115.8 $\pm$ 11 pA vs. 81.6 $\pm$ 6 pA   | 16 vs. 15 cells |
|                |                        | -115 pA: LIII vs. LX | <b>0.0003</b>     | (t) 3.606 ( <i>df</i> ) 451 | 107.7 $\pm$ 12 pA vs. 77.0 $\pm$ 8 pA   | 12 vs. 13 cells |
|                |                        | -110 pA: LIII vs. LX | <b>0.0003</b>     | (t) 3.686 ( <i>df</i> ) 451 | 104.2 $\pm$ 10 pA vs. 68.6 $\pm$ 7 pA   | 16 vs. 15 cells |
|                |                        | -105 pA: LIII vs. LX | <b>0.0036</b>     | (t) 2.925 ( <i>df</i> ) 451 | 94.7 $\pm$ 11 pA vs. 70.8 $\pm$ 7 pA    | 12 vs. 13 cells |
|                |                        | -100 pA: LIII vs. LX | <b>0.0053</b>     | (t) 2.804 ( <i>df</i> ) 451 | 89.5 $\pm$ 9 pA vs. 62.4 $\pm$ 7 pA     | 16 vs. 15 cells |
|                |                        | -95 pA: LIII vs. LX  | <b>0.0136</b>     | (t) 2.479 ( <i>df</i> ) 451 | 75.5 $\pm$ 9 pA vs. 56.2 $\pm$ 7 pA     | 12 vs. 13 cells |
|                |                        | -90 pA: LIII vs. LX  | <b>0.0356</b>     | (t) 2.108 ( <i>df</i> ) 451 | 69.8 $\pm$ 8 pA vs. 49.4 $\pm$ 6 pA     | 16 vs. 15 cells |
|                |                        | -85 pA: LIII vs. LX  | <b>0.0450</b>     | (t) 2.010 ( <i>df</i> ) 451 | 55.5 $\pm$ 7 pA vs. 40.8 $\pm$ 5 pA     | 12 vs. 13 cells |
|                |                        | -80 pA: LIII vs. LX  | 0.2164            | (t) 1.238 ( <i>df</i> ) 451 | 46.4 $\pm$ 6 pA vs. 34.5 $\pm$ 5 pA     | 16 vs. 15 cells |
|                |                        | -75 pA: LIII vs. LX  | 0.1599            | (t) 1.408 ( <i>df</i> ) 451 | 33.8 $\pm$ 5 pA vs. 25.1 $\pm$ 5 pA     | 12 vs. 13 cells |
|                |                        | -70 pA: LIII vs. LX  | 0.4581            | (t) 0.743 ( <i>df</i> ) 451 | 26.3 $\pm$ 3 pA vs. 19.2 $\pm$ 3 pA     | 16 vs. 15 cells |
|                |                        | -65 pA: LIII vs. LX  | 0.4646            | (t) 0.732 ( <i>df</i> ) 451 | 17.1 $\pm$ 2 pA vs. 15.1 $\pm$ 3 pA     | 12 vs. 13 cells |
|                |                        | -60 pA: LIII vs. LX  | 0.6434            | (t) 0.463 ( <i>df</i> ) 451 | 13.9 $\pm$ 2 pA vs. 9.4 $\pm$ 2 pA      | 16 vs. 15 cells |
|                |                        | -55 pA: LIII vs. LX  | 0.3855            | (t) 0.869 ( <i>df</i> ) 451 | 10.2 $\pm$ 2 pA vs. 6.9 $\pm$ 2 pA      | 12 vs. 13 cells |
|                |                        | -50 pA: LIII vs. LX  | >0.9999           | (t) 0.000 ( <i>df</i> ) 451 | 0.0 $\pm$ 0 pA vs. 0.0 $\pm$ 0 pA       | 16 vs. 15 cells |
| Figure 7B3     | Mixed-effects analysis | Time x Column factor | <b>&lt;0.0210</b> | F(16, 422)                  |                                         |                 |
|                |                        | -130 pA: LIII vs. LX | 0.0778            | (t) 1.768 ( <i>df</i> ) 451 | 69.8 $\pm$ 9 pA vs. 50.9 $\pm$ 10 pA    | 16 vs. 15 cells |
|                |                        | -125 pA: LIII vs. LX | 0.2572            | (t) 1.134 ( <i>df</i> ) 451 | 62.8 $\pm$ 15 pA vs. 45.9 $\pm$ 9 pA    | 12 vs. 13 cells |
|                |                        | -120 pA: LIII vs. LX | <b>0.0362</b>     | (t) 2.101 ( <i>df</i> ) 451 | 71.5 $\pm$ 8 pA vs. 50.3 $\pm$ 7 pA     | 16 vs. 15 cells |
|                |                        | -115 pA: LIII vs. LX | 0.2040            | (t) 1.272 ( <i>df</i> ) 451 | 65.2 $\pm$ 14 pA vs. 48.3 $\pm$ 9 pA    | 12 vs. 13 cells |
|                |                        | -110 pA: LIII vs. LX | <b>0.0238</b>     | (t) 2.268 ( <i>df</i> ) 451 | 71.7 $\pm$ 7 pA vs. 48.7 $\pm$ 7 pA     | 16 vs. 15 cells |
|                |                        | -105 pA: LIII vs. LX | 0.1231            | (t) 1.545 ( <i>df</i> ) 451 | 64.2 $\pm$ 13 pA vs. 44.4 $\pm$ 7 pA    | 12 vs. 13 cells |
|                |                        | -100 pA: LIII vs. LX | <b>0.0061</b>     | (t) 2.756 ( <i>df</i> ) 451 | 71.1 $\pm$ 7 pA vs. 43.2 $\pm$ 6 pA     | 16 vs. 15 cells |
|                |                        | -95 pA: LIII vs. LX  | <b>0.0205</b>     | (t) 2.324 ( <i>df</i> ) 451 | 71.0 $\pm$ 12 pA vs. 43.0 $\pm$ 8 pA    | 12 vs. 13 cells |
|                |                        | -90 pA: LIII vs. LX  | <b>0.0048</b>     | (t) 2.833 ( <i>df</i> ) 451 | 69.2 $\pm$ 6 pA vs. 40.6 $\pm$ 6 pA     | 16 vs. 15 cells |
|                |                        | -85 pA: LIII vs. LX  | 0.1267            | (t) 1.530 ( <i>df</i> ) 451 | 58.8 $\pm$ 11 pA vs. 39.1 $\pm$ 6 pA    | 12 vs. 13 cells |
|                |                        | -80 pA: LIII vs. LX  | <b>0.0114</b>     | (t) 2.539 ( <i>df</i> ) 451 | 58.6 $\pm$ 6 pA vs. 33.0 $\pm$ 6 pA     | 16 vs. 15 cells |
|                |                        | -75 pA: LIII vs. LX  | 0.1368            | (t) 1.490 ( <i>df</i> ) 451 | 48.8 $\pm$ 9 pA vs. 29.6 $\pm$ 5 pA     | 12 vs. 13 cells |
|                |                        | -70 pA: LIII vs. LX  | 0.0587            | (t) 1.895 ( <i>df</i> ) 451 | 40.2 $\pm$ 5 pA vs. 21.0 $\pm$ 4 pA     | 16 vs. 15 cells |
|                |                        | -65 pA: LIII vs. LX  | 0.4142            | (t) 0.817 ( <i>df</i> ) 451 | 25.0 $\pm$ 6 pA vs. 12.8 $\pm$ 3 pA     | 12 vs. 13 cells |
|                |                        | -60 pA: LIII vs. LX  | 0.3795            | (t) 0.880 ( <i>df</i> ) 451 | 16.6 $\pm$ 3 pA vs. 7.7 $\pm$ 2 pA      | 16 vs. 15 cells |
|                |                        | -55 pA: LIII vs. LX  | 0.6312            | (t) 0.480 ( <i>df</i> ) 451 | 2.8 $\pm$ 3 pA vs. 4.4 $\pm$ 1 pA       | 12 vs. 13 cells |
|                |                        | -50 pA: LIII vs. LX  | >0.9999           | (t) 0.000 ( <i>df</i> ) 451 | 0.0 $\pm$ 0 pA vs. 0.0 $\pm$ 0 pA       | 16 vs. 15 cells |

|               |                         |                           |                          |                                      |                                           |                 |
|---------------|-------------------------|---------------------------|--------------------------|--------------------------------------|-------------------------------------------|-----------------|
| Figure 7C2    | Kruskal–Wallis test     | aCSF+P: LIII vs LX        | 0.0565                   | (Z) 1.907                            | 78.88 ± 6.0 Hz vs. 60.48 ± 5.5 Hz         | 28 vs. 27 cells |
|               |                         | aCSF+PC: LIII vs LX       | <b><u>0.0009</u></b>     | (Z) 3.330                            | 81.90 ± 7.3 Hz vs. 43.99 ± 6.6 Hz         | 11 vs. 11 cells |
|               |                         | LIII: aCSF+P vs. aCSF+PC  | 0.5824                   | (Z) 0.550                            | 78.88 ± 6.0 Hz vs. 81.90 ± 7.3 Hz         | 28 vs. 11 cells |
|               |                         | LX: aCSF+P vs. aCSF+PC    | <b><u>0.0471</u></b>     | (Z) 1.985                            | 60.48 ± 5.5 Hz vs. 43.99 ± 6.6 Hz         | 27 vs. 11 cells |
| Figure 7C3    | Kruskal–Wallis test     | aCSF+P: LIII vs LX        | <b><u>0.0011</u></b>     | (Z) 3.269                            | 0.118 ± 0.02 vs. 0.093 ± 0.02             | 28 vs. 27 cells |
|               |                         | aCSF+PC: LIII vs LX       | <b><u>0.0006</u></b>     | (Z) 3.411                            | 0.104 ± 0.02 vs. 0.040 ± 0.00             | 11 vs. 11 cells |
|               |                         | LIII: aCSF+P vs. aCSF+PC  | 0.8958                   | (Z) 0.131                            | 0.118 ± 0.02 vs. 0.104 ± 0.02             | 28 vs. 11 cells |
|               |                         | LX: aCSF+P vs. aCSF+PC    | 0.0833                   | (Z) 1.732                            | 0.093 ± 0.02 vs. 0.040 ± 0.00             | 27 vs. 11 cells |
| Figure 7D     | Unpaired <i>t</i> -test | LIII vs. LX               | 0.9912                   | ( <i>t</i> ) 0.011 ( <i>df</i> ) 18  | −43.66 ± 1.6 Vm vs. −43.64 ± 1.2 Vm       | 9 vs. 11 cells  |
| Figure 7E     | Unpaired <i>t</i> -test | LIII vs. LX               | 0.1387                   | ( <i>t</i> ) 1.549 ( <i>df</i> ) 18  | 85.60 ± 1.9 mV vs. 92.16 ± 3.5 mV         | 9 vs. 11 cells  |
| Figure 7F1    | Welch’s <i>t</i> -test  | LIII vs. LX               | <b><u>0.0023</u></b>     | ( <i>t</i> ) 3.772 ( <i>df</i> ) 13  | 0.156 ± 0.006 msec vs. 0.211 ± 0.014 msec | 9 vs. 11 cells  |
| Figure 7F2    | Unpaired <i>t</i> -test | LIII vs. LX               | 0.5847                   | ( <i>t</i> ) 0.557 ( <i>df</i> ) 18  | 0.133 ± 0.006 msec vs. 0.138 ± 0.006 msec | 9 vs. 11 cells  |
| Figure 7F3    | Welch’s <i>t</i> -test  | LIII vs. LX               | <b><u>&lt;0.0001</u></b> | ( <i>t</i> ) 6.379 ( <i>df</i> ) 11  | 0.116 ± 0.003 msec vs. 0.229 ± 0.190 msec | 9 vs. 11 cells  |
| Figure 7 S1A1 | Welch’s <i>t</i> -test  | LIII vs. LX               | <b><u>0.0127</u></b>     | ( <i>t</i> ) 2.785 ( <i>df</i> ) 17  | 84.40 ± 5.6 Ω vs. 134.3 ± 17.0 Ω          | 16 vs. 15 cells |
| Figure 7 S1A2 | Welch’s <i>t</i> -test  | LIII vs. LX               | <b><u>0.0118</u></b>     | ( <i>t</i> ) 2.824 ( <i>df</i> ) 17  | 68.67 ± 5.4 Ω vs. 118.7 ± 16.9 Ω          | 16 vs. 15 cells |
| Figure 7 S1A3 | Unpaired <i>t</i> -test | LIII vs. LX               | 0.8988                   | ( <i>t</i> ) 0.128 ( <i>df</i> ) 29  | 15.73 ± 0.8 Ω vs. 15.58 ± 0.8 Ω           | 16 vs. 15 cells |
| Figure 7 S1B1 | Mixed-effects analysis  | LIII: aCSF vs. aCSF+P     | <b><u>&lt;0.0001</u></b> | F(16, 182)                           |                                           |                 |
|               |                         | LIII: aCSF vs. aCSF+Z     | <b><u>&lt;0.0001</u></b> | F(16, 21)                            |                                           |                 |
|               |                         | LIII: aCSF+P vs. aCSF+Z   | <b><u>&lt;0.0001</u></b> | F(16, 27)                            |                                           |                 |
| Figure 7 S1B2 | Mixed-effects analysis  | LX: aCSF vs. aCSF+P       | <b><u>&lt;0.0001</u></b> | F(16, 192)                           |                                           |                 |
|               |                         | LX: aCSF vs. aCSF+Z       | <b><u>&lt;0.0001</u></b> | F(16, 16)                            |                                           |                 |
|               |                         | LX: aCSF+P vs. aCSF+Z     | <b><u>&lt;0.0001</u></b> | F(16, 18)                            |                                           |                 |
| Figure 7 S1B3 | Two-way ANOVA           | LIII aCSF+Z vs. LX aCSF+Z | 0.7754                   | F(16, 80)                            |                                           |                 |
| Figure 7 S1D1 | Unpaired <i>t</i> -test | LIII vs. LX               | <b><u>0.0358</u></b>     | ( <i>t</i> ) 2.252 ( <i>df</i> ) 20  | 64.95 ± 3.9 Ω vs. 84.07 ± 6.5 Ω           | 9 vs. 13 cells  |
| Figure 7 S1D2 | Mann–Whitney U test     | LIII vs. LX               | <b><u>0.0364</u></b>     | ( <i>U</i> ) 27                      | 49.54 ± 3.8 Ω vs. 68.56 ± 6.4 Ω           | 9 vs. 13 cells  |
| Figure 7 S1D3 | Unpaired <i>t</i> -test | LIII vs. LX               | 0.9232                   | ( <i>t</i> ) 0.098 ( <i>df</i> ) 20  | 15.41 ± 0.7 Ω vs. 15.51 ± 0.7 Ω           | 9 vs. 13 cells  |
| Figure 7 S1E  | Unpaired <i>t</i> -test | LIII vs. LX               | 0.8031                   | ( <i>t</i> ) 0.2531 ( <i>df</i> ) 18 | 76.00 ± 12.5 pA vs. 69.91 ± 19.2 pA       | 9 vs. 11 cells  |
| Figure 7 S1F  | Unpaired <i>t</i> -test | LIII vs. LX               | <b><u>0.0585</u></b>     | ( <i>t</i> ) 2.020 ( <i>df</i> ) 18  | 34.90 ± 1.6 Vm vs. 42.13 ± 3.0 Vm         | 9 vs. 11 cells  |
